# Supplementary material for: Pericardial fluid proteomic label-free quantification of differentially expressed proteins in ischemic heart disease patients with systolic dysfunction by nano-LC-ESI-MS/MS analysis
Source: Royal Society of Chemistry journal article supplement (doi:10.1039/d0ra08389e), 2020-12-23
Supplement: d0ra08389e2.pdf [file d0ra08389e2.pdf]

## Supplementary Information

### **Pericardial fluid proteomic label-free quantification of differentially expressed proteins in ischemic heart disease patients with systolic dysfunction by nano-LC-ESI-MS/MS analysis**

Junaid Ullah<sup>a</sup>, Satwat Hashmi<sup>b</sup>, Arslan Ali<sup>c\*</sup>, Faisal Khan<sup>c</sup>, Shahid Ahmed Sami<sup>d</sup>, Nageeb Basir<sup>e</sup>, Syeda Saira Bokhari<sup>e</sup>, Hasanat Sharif<sup>d</sup>, Hesham R. El-Seedi<sup>f,g</sup> and Syed Ghulam Musharraf<sup>a,c\*</sup>

<sup>a</sup>*H.E.J. Research Institute of Chemistry, International Center for Chemical and Biological Sciences, University of Karachi, Karachi-75270, Pakistan*

<sup>b</sup>*Department of Biological and Biomedical Sciences, Agha Khan University, Karachi-74800, Pakistan*

<sup>c</sup>*Dr. Panjwani Center for Molecular Medicine and Drug Research, International Center for Chemical and Biological Sciences, University of Karachi, Karachi-75270, Pakistan*

<sup>d</sup>*Department of Surgery, Agha Khan University, Karachi-74800, Pakistan*

<sup>e</sup>*Department of Medicine, Agha Khan University, Karachi-74800, Pakistan*

<sup>f</sup>*Pharmacognosy Group, Department of Pharmaceutical Biosciences, BMC, Uppsala University, SE-751 23 Uppsala, Sweden.*

<sup>g</sup>*International Research Center for Food Nutrition and Safety, Jiangsu University, Zhenjiang 212013, China.*

\*Corresponding author. Tel.: +92 213 4824924-5; 4819010; fax: + 92 213 4819018-9.

E-mail address: [musharraf1977@yahoo.com](mailto:musharraf1977@yahoo.com), [arslanali1986@gmail.com](mailto:arslanali1986@gmail.com)

**Table S1.** List of 709 pericardial fluid proteins identified in IHD patients

| Row | Accession   | Protein                                                                          | MW [kDa] | pI  | Mascot Scores | #Peptides | SC [%] | RMS90 [ppm] | Rank | Median (LVEF>45):(LVEF<45) | #(LVEF>45):(LVEF<45) | CV [%] (LVEF>45):(LVEF<45) |
|-----|-------------|----------------------------------------------------------------------------------|----------|-----|---------------|-----------|--------|-------------|------|----------------------------|----------------------|----------------------------|
| 1   | ALBU_HUMAN  | Serum albumin OS=Homo sapiens OX=9606 GN=ALB PE=1 SV=2                           | 69.3     | 5.9 | 3565.8        | 62        | 73.9   | 42.24       | 1    | 5.02                       | 1                    | 0.00                       |
| 2   | TRFE_HUMAN  | Serotransferrin OS=Homo sapiens OX=9606 GN=TF PE=1 SV=3                          | 77.0     | 6.8 | 2660.8        | 43        | 50.9   | 44.56       | 2    | 2.09                       | 1                    | 0.00                       |
| 3   | CO3_HUMAN   | Complement C3 OS=Homo sapiens OX=9606 GN=C3 PE=1 SV=2                            | 187.0    | 6.0 | 1298.8        | 37        | 20.4   | 42.63       | 3    |                            |                      |                            |
| 4   | APOA1_HUMAN | Apolipoprotein A-I OS=Homo sapiens OX=9606 GN=APOA1 PE=1 SV=1                    | 30.8     | 5.6 | 1014.4        | 18        | 49.4   | 43.82       | 4    |                            |                      |                            |
| 5   | A2MG_HUMAN  | Alpha-2-macroglobulin OS=Homo sapiens OX=9606 GN=A2M PE=1 SV=3                   | 163.2    | 6.0 | 679.9         | 17        | 13.6   | 43.51       | 5    |                            |                      |                            |
| 6   | HPT_HUMAN   | Haptoglobin OS=Homo sapiens OX=9606 GN=HP PE=1 SV=1                              | 45.2     | 6.1 | 659.3         | 13        | 33.5   | 42.29       | 6    |                            |                      |                            |
| 7   | IGG1_HUMAN  | Immunoglobulin gamma-1 heavy chain OS=Homo sapiens OX=9606 PE=1 SV=2             | 49.3     | 8.9 | 654.7         | 12        | 29.2   | 41.66       | 7    |                            |                      |                            |
| 8   | A1AT_HUMAN  | Alpha-1-antitrypsin OS=Homo sapiens OX=9606 GN=SERPINA1 PE=1 SV=3                | 46.7     | 5.4 | 621.5         | 14        | 35.9   | 42.22       | 8    |                            |                      |                            |
| 9   | IGHA1_HUMAN | Immunoglobulin heavy constant alpha 1 OS=Homo sapiens OX=9606 GN=IGHA1 PE=1 SV=2 | 37.6     | 6.1 | 578.8         | 10        | 29.2   | 42.19       | 9    |                            |                      |                            |
| 10  | HBB_HUMAN   | Hemoglobin subunit beta OS=Homo sapiens OX=9606 GN=HBB PE=1 SV=2                 | 16.0     | 6.7 | 567.2         | 9         | 61.9   | 43.14       | 10   |                            |                      |                            |
| 11  | IGHG3_HUMAN | Immunoglobulin heavy constant gamma 3 OS=Homo sapiens OX=9606 GN=IGHG3 PE=1 SV=2 | 41.3     | 8.2 | 561.9         | 5         | 17.5   | 43.65       | 11   |                            |                      |                            |
| 12  | IGHG2_HUMAN | Immunoglobulin heavy constant gamma 2 OS=Homo sapiens OX=9606 GN=IGHG2 PE=1 SV=2 | 35.9     | 7.7 | 515.0         | 5         | 13.8   | 42.93       | 12   |                            |                      |                            |
| 13  | APOA4_HUMAN | Apolipoprotein A-IV OS=Homo sapiens OX=9606 GN=APOA4 PE=1 SV=3                   | 45.4     | 5.3 | 461.2         | 12        | 32.6   | 44.87       | 13   | 1.86                       | 1                    | 0.00                       |
| 14  | CO4A_HUMAN  | Complement C4-A OS=Homo sapiens OX=9606 GN=C4A PE=1 SV=2                         | 192.7    | 6.7 | 435.1         | 13        | 8.3    | 44.47       | 14   |                            |                      |                            |
| 15  | HBD_HUMAN   | Hemoglobin subunit delta OS=Homo sapiens OX=9606 GN=HBD PE=1 SV=2                | 16.0     | 7.8 | 433.2         | 2         | 17.0   | 40.62       | 15   |                            |                      |                            |
| 16  | HEMO_HUMAN  | Hemopexin OS=Homo sapiens OX=9606 GN=HPX PE=1 SV=2                               | 51.6     | 6.5 | 384.5         | 11        | 20.6   | 44.28       | 16   |                            |                      |                            |
| 17  | IGKC_HUMAN  | Immunoglobulin kappa constant OS=Homo sapiens OX=9606 GN=IGKC PE=1 SV=2          | 11.8     | 6.1 | 335.0         | 5         | 80.4   | 129.51      | 17   |                            |                      |                            |
| 18  | HBA_HUMAN   | Hemoglobin subunit alpha OS=Homo sapiens OX=9606 GN=HBA1 PE=1 SV=2               | 15.2     | 8.7 | 332.1         | 8         | 50.7   | 45.30       | 18   |                            |                      |                            |
| 19  | A1AG1_HUMAN | Alpha-1-acid glycoprotein 1 OS=Homo sapiens OX=9606 GN=ORM1 PE=1 SV=1            | 23.5     | 4.9 | 302.9         | 6         | 27.9   | 43.47       | 19   |                            |                      |                            |

|    |             |                                                                             |       |     |       |    |      |        |    |  |  |  |
|----|-------------|-----------------------------------------------------------------------------|-------|-----|-------|----|------|--------|----|--|--|--|
| 20 | VTDB_HUMAN  | Vitamin D-binding protein OS=Homo sapiens OX=9606 GN=GC PE=1 SV=2           | 52.9  | 5.3 | 299.5 | 10 | 22.2 | 43.67  | 20 |  |  |  |
| 21 | CERU_HUMAN  | Ceruloplasmin OS=Homo sapiens OX=9606 GN=CP PE=1 SV=1                       | 122.1 | 5.4 | 277.1 | 7  | 7.6  | 45.57  | 21 |  |  |  |
| 22 | HPTR_HUMAN  | Haptoglobin-related protein OS=Homo sapiens OX=9606 GN=HPR PE=2 SV=2        | 39.0  | 6.6 | 271.5 | 1  | 4.0  | 47.39  | 22 |  |  |  |
| 23 | A1BG_HUMAN  | Alpha-1B-glycoprotein OS=Homo sapiens OX=9606 GN=A1BG PE=1 SV=4             | 54.2  | 5.6 | 270.3 | 8  | 17.8 | 41.51  | 23 |  |  |  |
| 24 | CFAB_HUMAN  | Complement factor B OS=Homo sapiens OX=9606 GN=CFB PE=1 SV=2                | 85.5  | 6.7 | 259.8 | 5  | 7.6  | 45.71  | 24 |  |  |  |
| 25 | IGLC3_HUMAN | Immunoglobulin lambda constant 3 OS=Homo sapiens OX=9606 GN=IGLC3 PE=1 SV=1 | 11.3  | 6.9 | 244.6 | 5  | 62.3 | 38.32  | 25 |  |  |  |
| 26 | FETUA_HUMAN | Alpha-2-HS-glycoprotein OS=Homo sapiens OX=9606 GN=AHSG PE=1 SV=2           | 39.3  | 5.4 | 236.3 | 6  | 21.5 | 40.30  | 26 |  |  |  |
| 27 | KNG1_HUMAN  | Kininogen-1 OS=Homo sapiens OX=9606 GN=KNG1 PE=1 SV=2                       | 71.9  | 6.3 | 222.4 | 5  | 6.8  | 45.60  | 27 |  |  |  |
| 28 | AACT_HUMAN  | Alpha-1-antichymotrypsin OS=Homo sapiens OX=9606 GN=SERPINA3 PE=1 SV=2      | 47.6  | 5.3 | 221.4 | 5  | 11.1 | 45.72  | 28 |  |  |  |
| 29 | IGHM_HUMAN  | Immunoglobulin heavy constant mu OS=Homo sapiens OX=9606 GN=IGHM PE=1 SV=4  | 49.4  | 6.3 | 211.2 | 7  | 17.9 | 43.92  | 29 |  |  |  |
| 30 | ZA2G_HUMAN  | Zinc-alpha-2-glycoprotein OS=Homo sapiens OX=9606 GN=AZGP1 PE=1 SV=2        | 34.2  | 5.7 | 206.5 | 6  | 23.5 | 44.38  | 30 |  |  |  |
| 31 | IGM_HUMAN   | Immunoglobulin mu heavy chain OS=Homo sapiens OX=9606 PE=1 SV=2             | 63.4  | 8.1 | 189.7 | 1  | 1.2  | 46.04  | 31 |  |  |  |
| 32 | CFAH_HUMAN  | Complement factor H OS=Homo sapiens OX=9606 GN=CFH PE=1 SV=4                | 139.0 | 6.2 | 186.9 | 6  | 5.5  | 43.69  | 32 |  |  |  |
| 33 | ANT3_HUMAN  | Antithrombin-III OS=Homo sapiens OX=9606 GN=SERPINC1 PE=1 SV=1              | 52.6  | 6.3 | 185.9 | 6  | 14.7 | 43.80  | 33 |  |  |  |
| 34 | ITLN1_HUMAN | Intellectin-1 OS=Homo sapiens OX=9606 GN=ITLN1 PE=1 SV=1                    | 34.9  | 5.7 | 185.4 | 3  | 10.9 | 44.30  | 34 |  |  |  |
| 35 | FIBG_HUMAN  | Fibrinogen gamma chain OS=Homo sapiens OX=9606 GN=FGG PE=1 SV=3             | 51.5  | 5.4 | 183.9 | 5  | 13.2 | 44.25  | 35 |  |  |  |
| 36 | AFAM_HUMAN  | Afamin OS=Homo sapiens OX=9606 GN=AFM PE=1 SV=1                             | 69.0  | 5.6 | 173.7 | 5  | 9.2  | 46.04  | 36 |  |  |  |
| 37 | HRG_HUMAN   | Histidine-rich glycoprotein OS=Homo sapiens OX=9606 GN=HRG PE=1 SV=1        | 59.5  | 7.1 | 167.7 | 3  | 7.0  | 45.85  | 37 |  |  |  |
| 38 | VTNC_HUMAN  | Vitronectin OS=Homo sapiens OX=9606 GN=VTN PE=1 SV=1                        | 54.3  | 5.6 | 154.5 | 3  | 8.4  | 47.28  | 38 |  |  |  |
| 39 | FIBB_HUMAN  | Fibrinogen beta chain OS=Homo sapiens OX=9606 GN=FGB PE=1 SV=2              | 55.9  | 8.5 | 148.2 | 3  | 7.3  | 275.80 | 39 |  |  |  |
| 40 | APOH_HUMAN  | Beta-2-glycoprotein 1 OS=Homo sapiens OX=9606 GN=APOH PE=1 SV=3             | 38.3  | 8.3 | 143.8 | 4  | 11.9 | 45.01  | 40 |  |  |  |

|    |             |                                                                                         |       |     |       |   |      |        |    |      |   |      |
|----|-------------|-----------------------------------------------------------------------------------------|-------|-----|-------|---|------|--------|----|------|---|------|
| 41 | A1AG2_HUMAN | Alpha-1-acid glycoprotein 2 OS=Homo sapiens OX=9606 GN=ORM2 PE=1 SV=2                   | 23.6  | 5.0 | 141.6 | 3 | 11.9 | 42.12  | 41 |      |   |      |
| 42 | ITIH2_HUMAN | Inter-alpha-trypsin inhibitor heavy chain H2 OS=Homo sapiens OX=9606 GN=ITIH2 PE=1 SV=2 | 106.4 | 6.4 | 139.8 | 3 | 4.1  | 45.23  | 42 |      |   |      |
| 43 | THRB_HUMAN  | Prothrombin OS=Homo sapiens OX=9606 GN=F2 PE=1 SV=2                                     | 70.0  | 5.6 | 133.8 | 3 | 5.1  | 47.00  | 43 |      |   |      |
| 44 | POTEE_HUMAN | POTE ankyrin domain family member E OS=Homo sapiens OX=9606 GN=POTEE PE=2 SV=3          | 121.3 | 5.8 | 132.5 | 4 | 4.0  | 42.18  | 44 |      |   |      |
| 45 | AMBP_HUMAN  | Protein AMBP OS=Homo sapiens OX=9606 GN=AMBP PE=1 SV=1                                  | 39.0  | 5.9 | 132.0 | 3 | 7.7  | 319.68 | 45 |      |   |      |
| 46 | A2GL_HUMAN  | Leucine-rich alpha-2-glycoprotein OS=Homo sapiens OX=9606 GN=LRG1 PE=1 SV=2             | 38.2  | 6.5 | 130.6 | 4 | 15.6 | 40.89  | 46 |      |   |      |
| 47 | LUM_HUMAN   | Lumican OS=Homo sapiens OX=9606 GN=LUM PE=1 SV=2                                        | 38.4  | 6.2 | 128.0 | 4 | 12.4 | 41.41  | 47 |      |   |      |
| 48 | PGRP2_HUMAN | N-acetylmuramoyl-L-alanine amidase OS=Homo sapiens OX=9606 GN=PGLYRP2 PE=1 SV=1         | 62.2  | 7.3 | 115.0 | 2 | 4.7  | 46.67  | 48 |      |   |      |
| 49 | FINC_HUMAN  | Fibronectin OS=Homo sapiens OX=9606 GN=FN1 PE=1 SV=5                                    | 272.1 | 5.3 | 114.1 | 4 | 1.9  | 46.55  | 49 |      |   |      |
| 50 | PLMN_HUMAN  | Plasminogen OS=Homo sapiens OX=9606 GN=PLG PE=1 SV=2                                    | 90.5  | 7.0 | 107.3 | 4 | 4.6  | 45.57  | 50 |      |   |      |
| 51 | GELS_HUMAN  | Gelsolin OS=Homo sapiens OX=9606 GN=GSN PE=1 SV=1                                       | 85.6  | 5.9 | 96.2  | 3 | 5.0  | 45.20  | 51 |      |   |      |
| 52 | APOA2_HUMAN | Apolipoprotein A-II OS=Homo sapiens OX=9606 GN=APOA2 PE=1 SV=1                          | 11.2  | 6.3 | 86.3  | 3 | 21.0 | 48.51  | 52 |      |   |      |
| 53 | LV39_HUMAN  | Immunoglobulin lambda variable 3-9 OS=Homo sapiens OX=9606 GN=IGLV3-9 PE=3 SV=1         | 12.3  | 6.8 | 82.7  | 1 | 13.9 | 45.02  | 53 |      |   |      |
| 54 | KV108_HUMAN | Immunoglobulin kappa variable 1-8 OS=Homo sapiens OX=9606 GN=IGKV1-8 PE=3 SV=1          | 12.5  | 9.2 | 78.6  | 1 | 13.9 | 43.51  | 54 |      |   |      |
| 55 | ITIH4_HUMAN | Inter-alpha-trypsin inhibitor heavy chain H4 OS=Homo sapiens OX=9606 GN=ITIH4 PE=1 SV=4 | 103.3 | 6.5 | 78.2  | 3 | 3.3  | 45.08  | 55 |      |   |      |
| 56 | MSLN_HUMAN  | Mesothelin OS=Homo sapiens OX=9606 GN=MSLN PE=1 SV=2                                    | 68.9  | 6.0 | 76.2  | 3 | 5.4  | 572.57 | 56 | 4.60 | 1 | 0.00 |
| 57 | FIBA_HUMAN  | Fibrinogen alpha chain OS=Homo sapiens OX=9606 GN=FGA PE=1 SV=2                         | 94.9  | 5.7 | 75.8  | 3 | 4.0  | 42.76  | 57 |      |   |      |
| 58 | FA12_HUMAN  | Coagulation factor XII OS=Homo sapiens OX=9606 GN=F12 PE=1 SV=3                         | 67.7  | 8.0 | 74.5  | 3 | 5.7  | 43.21  | 58 |      |   |      |
| 59 | KVD20_HUMAN | Immunoglobulin kappa variable 3D-20 OS=Homo sapiens OX=9606 GN=IGKV3D-20 PE=3 SV=1      | 12.5  | 4.5 | 74.0  | 2 | 27.6 | 40.27  | 59 |      |   |      |

|    |             |                                                                                                                                    |            |     |      |   |      |         |    |  |  |
|----|-------------|------------------------------------------------------------------------------------------------------------------------------------|------------|-----|------|---|------|---------|----|--|--|
| 60 | TTHY_HUMAN  | Transthyretin OS=Homo sapiens<br>OX=9606 GN=TTR PE=1 SV=1                                                                          | 15.9       | 5.5 | 73.2 | 2 | 18.4 | 47.26   | 60 |  |  |
| 61 | MACF1_HUMAN | Microtubule-actin cross-linking factor<br>1, isoforms 1/2/3/5 OS=Homo sapiens<br>OX=9606 GN=MACF1 PE=1 SV=4                        | 837.8      | 5.3 | 71.8 | 3 | 0.5  | 31.58   | 61 |  |  |
| 62 | KV320_HUMAN | Immunoglobulin kappa variable 3-20<br>OS=Homo sapiens OX=9606 GN=IGKV3-<br>20 PE=1 SV=2                                            | 12.5       | 4.9 | 71.8 | 1 | 7.8  | 44.90   | 62 |  |  |
| 63 | TITIN_HUMAN | Titin OS=Homo sapiens OX=9606<br>GN=TTN PE=1 SV=4                                                                                  | 3813.<br>7 | 6.0 | 71.3 | 3 | 0.1  | 1086.00 | 63 |  |  |
| 64 | KDM5C_HUMAN | Lysine-specific demethylase 5C<br>OS=Homo sapiens OX=9606<br>GN=KDM5C PE=1 SV=2                                                    | 175.6      | 5.4 | 68.0 | 3 | 1.7  | 44.46   | 64 |  |  |
| 65 | WDR87_HUMAN | WD repeat-containing protein 87<br>OS=Homo sapiens OX=9606<br>GN=WDR87 PE=1 SV=3                                                   | 333.0      | 6.9 | 67.1 | 3 | 0.9  | 532.39  | 65 |  |  |
| 66 | VIME_HUMAN  | Vimentin OS=Homo sapiens OX=9606<br>GN=VIM PE=1 SV=4                                                                               | 53.6       | 5.1 | 64.5 | 2 | 5.2  | 47.23   | 66 |  |  |
| 67 | PRG4_HUMAN  | Proteoglycan 4 OS=Homo sapiens<br>OX=9606 GN=PRG4 PE=1 SV=3                                                                        | 151.0      | 9.5 | 64.5 | 2 | 2.4  | 43.49   | 67 |  |  |
| 68 | KVD28_HUMAN | Immunoglobulin kappa variable 2D-28<br>OS=Homo sapiens OX=9606<br>GN=IGKV2D-28 PE=1 SV=2                                           | 12.9       | 5.6 | 64.4 | 1 | 10.8 | 42.83   | 68 |  |  |
| 69 | IC1_HUMAN   | Plasma protease C1 inhibitor OS=Homo<br>sapiens OX=9606 GN=SERPING1 PE=1<br>SV=2                                                   | 55.1       | 6.1 | 60.1 | 2 | 4.2  | 529.97  | 69 |  |  |
| 70 | CO5_HUMAN   | Complement C5 OS=Homo sapiens<br>OX=9606 GN=C5 PE=1 SV=4                                                                           | 188.2      | 6.1 | 59.7 | 2 | 1.1  | 710.78  | 70 |  |  |
| 71 | C1QC_HUMAN  | Complement C1q subcomponent<br>subunit C OS=Homo sapiens OX=9606<br>GN=C1QC PE=1 SV=3                                              | 25.8       | 8.6 | 59.5 | 2 | 9.0  | 48.02   | 71 |  |  |
| 72 | SYNE2_HUMAN | Nesprin-2 OS=Homo sapiens OX=9606<br>GN=SYNE2 PE=1 SV=3                                                                            | 795.9      | 5.3 | 58.6 | 1 | 0.1  | 54.74   | 72 |  |  |
| 73 | CFAI_HUMAN  | Complement factor I OS=Homo sapiens<br>OX=9606 GN=CFI PE=1 SV=2                                                                    | 65.7       | 7.7 | 57.8 | 2 | 3.9  | 48.51   | 73 |  |  |
| 74 | NEBU_HUMAN  | Nebulin OS=Homo sapiens OX=9606<br>GN=NEB PE=1 SV=5                                                                                | 772.4      | 9.1 | 56.3 | 3 | 0.4  | 868.77  | 74 |  |  |
| 75 | ANGT_HUMAN  | Angiotensinogen OS=Homo sapiens<br>OX=9606 GN=AGT PE=1 SV=1                                                                        | 53.1       | 5.9 | 56.1 | 2 | 6.0  | 44.68   | 75 |  |  |
| 76 | KV311_HUMAN | Immunoglobulin kappa variable 3-11<br>OS=Homo sapiens OX=9606 GN=IGKV3-<br>11 PE=1 SV=1                                            | 12.6       | 4.9 | 53.8 | 1 | 7.8  | 44.17   | 76 |  |  |
| 77 | P3C2B_HUMAN | Phosphatidylinositol 4-phosphate 3-<br>kinase C2 domain-containing subunit<br>beta OS=Homo sapiens OX=9606<br>GN=PIK3C2B PE=1 SV=2 | 184.7      | 6.9 | 53.0 | 2 | 0.9  | 27.27   | 77 |  |  |

|    |             |                                                                                                        |       |     |      |   |      |         |    |      |   |      |
|----|-------------|--------------------------------------------------------------------------------------------------------|-------|-----|------|---|------|---------|----|------|---|------|
| 78 | IDH3A_HUMAN | Isocitrate dehydrogenase [NAD] subunit alpha, mitochondrial OS=Homo sapiens OX=9606 GN=IDH3A PE=1 SV=1 | 39.6  | 6.5 | 51.5 | 1 | 2.7  | 14.85   | 78 |      |   |      |
| 79 | EVPL_HUMAN  | Envoplakin OS=Homo sapiens OX=9606 GN=EVPL PE=1 SV=3                                                   | 231.5 | 6.6 | 51.1 | 2 | 0.8  | 14.41   | 79 |      |   |      |
| 80 | RHG44_HUMAN | Rho GTPase-activating protein 44 OS=Homo sapiens OX=9606 GN=ARHGAP44 PE=1 SV=1                         | 89.2  | 6.1 | 51.1 | 2 | 1.1  | 12.74   | 80 | 2.26 | 1 | 0.00 |
| 81 | ZNF41_HUMAN | Zinc finger protein 41 OS=Homo sapiens OX=9606 GN=ZNF41 PE=1 SV=2                                      | 93.7  | 9.1 | 51.0 | 1 | 1.0  | 1052.52 | 81 |      |   |      |
| 82 | UN45A_HUMAN | Protein unc-45 homolog A OS=Homo sapiens OX=9606 GN=UNC45A PE=1 SV=1                                   | 103.0 | 5.8 | 49.7 | 1 | 1.1  | 55.10   | 82 |      |   |      |
| 83 | EPG5_HUMAN  | Ectopic P granules protein 5 homolog OS=Homo sapiens OX=9606 GN=EPG5 PE=1 SV=2                         | 292.3 | 6.0 | 49.0 | 2 | 0.6  | 868.44  | 83 |      |   |      |
| 84 | AKAP9_HUMAN | A-kinase anchor protein 9 OS=Homo sapiens OX=9606 GN=AKAP9 PE=1 SV=4                                   | 452.7 | 4.9 | 48.0 | 1 | 0.2  | 31.26   | 84 |      |   |      |
| 85 | CSCL2_HUMAN | CSC1-like protein 2 OS=Homo sapiens OX=9606 GN=TMEM63B PE=1 SV=1                                       | 94.9  | 7.2 | 47.2 | 2 | 1.9  | 366.04  | 85 |      |   |      |
| 86 | KVD33_HUMAN | Immunoglobulin kappa variable 1D-33 OS=Homo sapiens OX=9606 GN=IGKV1D-33 PE=1 SV=2                     | 12.8  | 4.5 | 46.5 | 1 | 13.7 | 44.57   | 86 |      |   |      |
| 87 | ZFHX4_HUMAN | Zinc finger homeobox protein 4 OS=Homo sapiens OX=9606 GN=ZFHX4 PE=1 SV=1                              | 393.5 | 5.9 | 46.4 | 1 | 0.2  | 24.68   | 87 |      |   |      |
| 88 | CO7_HUMAN   | Complement component C7 OS=Homo sapiens OX=9606 GN=C7 PE=1 SV=2                                        | 93.5  | 6.1 | 46.3 | 2 | 2.0  | 45.19   | 88 |      |   |      |
| 89 | FHR1_HUMAN  | Complement factor H-related protein 1 OS=Homo sapiens OX=9606 GN=CFHR1 PE=1 SV=2                       | 37.6  | 7.4 | 46.2 | 1 | 3.9  | 48.09   | 89 |      |   |      |
| 90 | CHD9_HUMAN  | Chromodomain-helicase-DNA-binding protein 9 OS=Homo sapiens OX=9606 GN=CHD9 PE=1 SV=2                  | 325.8 | 6.6 | 45.2 | 1 | 0.3  | 20.13   | 90 |      |   |      |
| 91 | HV323_HUMAN | Immunoglobulin heavy variable 3-23 OS=Homo sapiens OX=9606 GN=IGHV3-23 PE=1 SV=2                       | 12.6  | 8.5 | 42.5 | 2 | 18.8 | 43.58   | 91 |      |   |      |
| 92 | EZRI_HUMAN  | Ezrin OS=Homo sapiens OX=9606 GN=EZR PE=1 SV=4                                                         | 69.4  | 5.9 | 42.4 | 2 | 2.7  | 32.83   | 92 |      |   |      |
| 93 | CAPS1_HUMAN | Calcium-dependent secretion activator 1 OS=Homo sapiens OX=9606 GN=CADPS PE=1 SV=3                     | 152.7 | 5.5 | 42.2 | 2 | 2.2  | 660.18  | 93 |      |   |      |
| 94 | ABCA3_HUMAN | ATP-binding cassette sub-family A member 3 OS=Homo sapiens OX=9606 GN=ABCA3 PE=1 SV=2                  | 191.2 | 7.5 | 42.2 | 1 | 0.5  | 810.51  | 94 |      |   |      |

|     |             |                                                                                                         |       |     |      |   |     |         |     |      |   |      |
|-----|-------------|---------------------------------------------------------------------------------------------------------|-------|-----|------|---|-----|---------|-----|------|---|------|
| 95  | WDR55_HUMAN | WD repeat-containing protein 55<br>OS=Homo sapiens OX=9606<br>GN=WDR55 PE=1 SV=2                        | 42.0  | 4.8 | 42.1 | 2 | 4.4 | 679.61  | 95  |      |   |      |
| 96  | DOCK9_HUMAN | Dedicator of cytokinesis protein 9<br>OS=Homo sapiens OX=9606<br>GN=DOCK9 PE=1 SV=2                     | 236.3 | 7.2 | 41.8 | 1 | 0.6 | 37.07   | 96  |      |   |      |
| 97  | KLC4_HUMAN  | Kinesin light chain 4 OS=Homo sapiens<br>OX=9606 GN=KLC4 PE=1 SV=3                                      | 68.6  | 5.8 | 41.4 | 1 | 1.9 | 15.11   | 97  |      |   |      |
| 98  | BUP1_HUMAN  | Beta-ureidopropionase OS=Homo sapiens<br>OX=9606 GN=UPB1 PE=1 SV=1                                      | 43.1  | 6.1 | 41.2 | 2 | 5.5 | 12.70   | 98  |      |   |      |
| 99  | MABP1_HUMAN | Mitogen-activated protein kinase-binding protein 1 OS=Homo sapiens<br>OX=9606 GN=MAPKBP1 PE=1 SV=4      | 163.7 | 6.3 | 41.0 | 1 | 0.7 | 766.28  | 99  |      |   |      |
| 100 | BRCA2_HUMAN | Breast cancer type 2 susceptibility protein OS=Homo sapiens OX=9606<br>GN=BRCA2 PE=1 SV=3               | 384.0 | 6.3 | 40.9 | 1 | 0.4 | 697.25  | 100 |      |   |      |
| 101 | CO6_HUMAN   | Complement component C6 OS=Homo sapiens<br>OX=9606 GN=C6 PE=1 SV=3                                      | 104.7 | 6.4 | 40.8 | 1 | 0.9 | 46.98   | 101 |      |   |      |
| 102 | ARHGC_HUMAN | Rho guanine nucleotide exchange factor 12 OS=Homo sapiens OX=9606<br>GN=ARHGEF12 PE=1 SV=1              | 173.1 | 5.5 | 40.6 | 1 | 0.7 | 57.15   | 102 |      |   |      |
| 103 | UBP16_HUMAN | Ubiquitin carboxyl-terminal hydrolase 16 OS=Homo sapiens OX=9606<br>GN=USP16 PE=1 SV=1                  | 93.5  | 6.5 | 40.3 | 1 | 1.0 | 1020.20 | 103 |      |   |      |
| 104 | RGS9_HUMAN  | Regulator of G-protein signaling 9 OS=Homo sapiens OX=9606 GN=RGS9<br>PE=1 SV=1                         | 76.9  | 9.4 | 39.8 | 2 | 3.1 | 14.50   | 104 |      |   |      |
| 105 | SPTN4_HUMAN | Spectrin beta chain, non-erythrocytic 4 OS=Homo sapiens OX=9606<br>GN=SPTBN4 PE=1 SV=2                  | 288.8 | 5.7 | 39.5 | 1 | 0.3 | 24.89   | 105 |      |   |      |
| 106 | PEDF_HUMAN  | Pigment epithelium-derived factor OS=Homo sapiens OX=9606<br>GN=SERPINF1 PE=1 SV=4                      | 46.3  | 6.0 | 39.2 | 2 | 6.2 | 48.05   | 106 |      |   |      |
| 107 | PKHG1_HUMAN | Pleckstrin homology domain-containing family G member 1 OS=Homo sapiens<br>OX=9606 GN=PLEKHG1 PE=1 SV=2 | 155.3 | 5.8 | 39.0 | 2 | 1.2 | 790.35  | 107 |      |   |      |
| 108 | ASTN2_HUMAN | Astrotactin-2 OS=Homo sapiens OX=9606 GN=ASTN2 PE=1 SV=2                                                | 148.1 | 5.7 | 38.8 | 2 | 1.3 | 1028.02 | 108 |      |   |      |
| 109 | S26A6_HUMAN | Solute carrier family 26 member 6 OS=Homo sapiens OX=9606<br>GN=SLC26A6 PE=1 SV=1                       | 82.9  | 8.6 | 38.6 | 2 | 1.3 | 1118.68 | 109 |      |   |      |
| 110 | CP19A_HUMAN | Aromatase OS=Homo sapiens OX=9606<br>GN=CYP19A1 PE=1 SV=3                                               | 57.8  | 7.2 | 38.5 | 2 | 2.6 | 623.97  | 110 |      |   |      |
| 111 | OSBL6_HUMAN | Oxysterol-binding protein-related protein 6 OS=Homo sapiens OX=9606<br>GN=OSBPL6 PE=1 SV=1              | 106.2 | 6.5 | 38.4 | 2 | 2.1 | 36.23   | 111 | 1.89 | 1 | 0.00 |

|     |              |                                                                                                           |       |      |      |   |     |        |     |      |   |      |
|-----|--------------|-----------------------------------------------------------------------------------------------------------|-------|------|------|---|-----|--------|-----|------|---|------|
| 112 | SKT_HUMAN    | Sickle tail protein homolog OS=Homo sapiens OX=9606 GN=KIAA1217 PE=1 SV=2                                 | 214.0 | 6.6  | 38.3 | 2 | 1.0 | 940.44 | 112 |      |   |      |
| 113 | PRR11_HUMAN  | Proline-rich protein 11 OS=Homo sapiens OX=9606 GN=PRR11 PE=1 SV=1                                        | 40.1  | 10.1 | 38.2 | 1 | 2.5 | 6.03   | 113 |      |   |      |
| 114 | AR6P4_HUMAN  | ADP-ribosylation factor-like protein 6-interacting protein 4 OS=Homo sapiens OX=9606 GN=ARL6IP4 PE=1 SV=2 | 44.9  | 10.9 | 38.2 | 2 | 6.4 | 718.94 | 114 |      |   |      |
| 115 | PEPL_HUMAN   | Periplakin OS=Homo sapiens OX=9606 GN=PPL PE=1 SV=4                                                       | 204.6 | 5.5  | 38.0 | 2 | 1.3 | 862.46 | 115 |      |   |      |
| 116 | FHAD1_HUMAN  | Forkhead-associated domain-containing protein 1 OS=Homo sapiens OX=9606 GN=FHAD1 PE=2 SV=2                | 161.8 | 6.5  | 37.8 | 1 | 0.6 | 53.68  | 116 |      |   |      |
| 117 | GLI2_HUMAN   | Zinc finger protein GLI2 OS=Homo sapiens OX=9606 GN=GLI2 PE=1 SV=4                                        | 167.7 | 6.9  | 37.7 | 2 | 1.5 | 664.68 | 117 | 0.22 | 1 | 0.00 |
| 118 | RRBP1_HUMAN  | Ribosome-binding protein 1 OS=Homo sapiens OX=9606 GN=RRBP1 PE=1 SV=5                                     | 152.4 | 8.7  | 37.3 | 2 | 1.4 | 715.23 | 118 |      |   |      |
| 119 | CK5P2_HUMAN  | CDK5 regulatory subunit-associated protein 2 OS=Homo sapiens OX=9606 GN=CDK5RAP2 PE=1 SV=5                | 214.9 | 5.4  | 37.2 | 1 | 0.4 | 43.86  | 119 |      |   |      |
| 120 | TETN_HUMAN   | Tetranectin OS=Homo sapiens OX=9606 GN=CLEC3B PE=1 SV=3                                                   | 22.5  | 5.5  | 36.9 | 1 | 4.5 | 47.24  | 120 |      |   |      |
| 121 | FBLN3_HUMAN  | EGF-containing fibulin-like extracellular matrix protein 1 OS=Homo sapiens OX=9606 GN=EFEMP1 PE=1 SV=2    | 54.6  | 5.0  | 36.7 | 1 | 1.8 | 44.61  | 121 |      |   |      |
| 122 | CBG_HUMAN    | Corticosteroid-binding globulin OS=Homo sapiens OX=9606 GN=SERPINA6 PE=1 SV=1                             | 45.1  | 5.6  | 36.5 | 1 | 2.5 | 41.67  | 122 |      |   |      |
| 123 | FMNL1_HUMAN  | Formin-like protein 1 OS=Homo sapiens OX=9606 GN=FMNL1 PE=1 SV=3                                          | 121.8 | 5.6  | 36.1 | 2 | 1.5 | 48.85  | 123 |      |   |      |
| 124 | AHNAK2_HUMAN | Protein AHNAK2 OS=Homo sapiens OX=9606 GN=AHNAK2 PE=1 SV=2                                                | 616.2 | 5.2  | 35.9 | 2 | 0.3 | 708.57 | 124 |      |   |      |
| 125 | CC178_HUMAN  | Coiled-coil domain-containing protein 178 OS=Homo sapiens OX=9606 GN=CCDC178 PE=2 SV=3                    | 101.9 | 6.3  | 35.9 | 2 | 2.1 | 720.62 | 125 |      |   |      |
| 126 | ZNF512_HUMAN | Zinc finger protein 512 OS=Homo sapiens OX=9606 GN=ZNF512 PE=1 SV=2                                       | 64.6  | 9.8  | 35.9 | 2 | 3.5 | 774.09 | 126 |      |   |      |
| 127 | RET4_HUMAN   | Retinol-binding protein 4 OS=Homo sapiens OX=9606 GN=RBP4 PE=1 SV=3                                       | 23.0  | 5.8  | 35.6 | 1 | 5.0 | 45.26  | 127 |      |   |      |
| 128 | CD44_HUMAN   | CD44 antigen OS=Homo sapiens OX=9606 GN=CD44 PE=1 SV=3                                                    | 81.5  | 5.1  | 35.5 | 1 | 1.6 | 45.83  | 128 |      |   |      |
| 129 | PRP16_HUMAN  | Pre-mRNA-splicing factor ATP-dependent RNA helicase PRP16 OS=Homo sapiens OX=9606 GN=DHX38 PE=1 SV=2      | 140.4 | 6.1  | 35.2 | 2 | 1.4 | 700.92 | 129 |      |   |      |



|     |             |                                                                                                       |       |     |      |   |      |         |     |      |   |      |
|-----|-------------|-------------------------------------------------------------------------------------------------------|-------|-----|------|---|------|---------|-----|------|---|------|
| 130 | S22A1_HUMAN | Solute carrier family 22 member 1<br>OS=Homo sapiens OX=9606<br>GN=SLC22A1 PE=1 SV=2                  | 61.1  | 6.4 | 35.1 | 2 | 4.5  | 868.39  | 130 |      |   |      |
| 131 | CE162_HUMAN | Centrosomal protein of 162 kDa<br>OS=Homo sapiens OX=9606<br>GN=CEP162 PE=1 SV=2                      | 161.8 | 5.4 | 34.9 | 2 | 0.7  | 851.47  | 131 |      |   |      |
| 132 | TET3_HUMAN  | Methylcytosine dioxygenase TET3<br>OS=Homo sapiens OX=9606 GN=TET3<br>PE=1 SV=4                       | 193.6 | 8.0 | 34.9 | 1 | 0.5  | 14.60   | 132 |      |   |      |
| 133 | AMOT_HUMAN  | Angiomotin OS=Homo sapiens<br>OX=9606 GN=AMOT PE=1 SV=1                                               | 118.0 | 7.3 | 34.7 | 1 | 0.9  | 65.19   | 133 |      |   |      |
| 134 | NAA25_HUMAN | N-alpha-acetyltransferase 25, NatB<br>auxiliary subunit OS=Homo sapiens<br>OX=9606 GN=NAA25 PE=1 SV=1 | 112.2 | 6.2 | 34.6 | 1 | 0.7  | 1137.69 | 134 |      |   |      |
| 135 | TBC15_HUMAN | TBC1 domain family member 15<br>OS=Homo sapiens OX=9606<br>GN=TBC1D15 PE=1 SV=2                       | 79.4  | 5.4 | 34.3 | 2 | 2.6  | 31.44   | 135 |      |   |      |
| 136 | SAA2_HUMAN  | Serum amyloid A-2 protein OS=Homo<br>sapiens OX=9606 GN=SAA2 PE=1 SV=1                                | 13.5  | 9.2 | 34.3 | 1 | 11.5 | 46.31   | 136 |      |   |      |
| 137 | SRBP2_HUMAN | Sterol regulatory element-binding<br>protein 2 OS=Homo sapiens OX=9606<br>GN=SREBF2 PE=1 SV=2         | 123.6 | 8.7 | 34.2 | 1 | 1.0  | 1.51    | 137 | 1.50 | 1 | 0.00 |
| 138 | HSPB1_HUMAN | Heat shock protein beta-1 OS=Homo<br>sapiens OX=9606 GN=HSPB1 PE=1 SV=2                               | 22.8  | 6.0 | 34.2 | 1 | 4.9  | 48.95   | 138 |      |   |      |
| 139 | UN13B_HUMAN | Protein unc-13 homolog B OS=Homo<br>sapiens OX=9606 GN=UNC13B PE=1<br>SV=2                            | 180.6 | 5.7 | 34.0 | 2 | 1.3  | 600.80  | 139 |      |   |      |
| 140 | ZN749_HUMAN | Zinc finger protein 749 OS=Homo<br>sapiens OX=9606 GN=ZNF749 PE=1<br>SV=2                             | 90.3  | 9.0 | 34.0 | 2 | 1.9  | 1069.42 | 140 |      |   |      |
| 141 | CO2_HUMAN   | Complement C2 OS=Homo sapiens<br>OX=9606 GN=C2 PE=1 SV=2                                              | 83.2  | 7.2 | 33.9 | 1 | 1.6  | 48.39   | 141 |      |   |      |
| 142 | NAV1_HUMAN  | Neuron navigator 1 OS=Homo sapiens<br>OX=9606 GN=NAV1 PE=1 SV=2                                       | 202.3 | 8.2 | 33.9 | 2 | 1.1  | 599.16  | 142 |      |   |      |
| 143 | SZT2_HUMAN  | KICSTOR complex protein SZT2<br>OS=Homo sapiens OX=9606 GN=SZT2<br>PE=1 SV=3                          | 377.8 | 5.9 | 33.8 | 2 | 0.4  | 1008.32 | 143 |      |   |      |
| 144 | PHLB2_HUMAN | Pleckstrin homology-like domain family<br>B member 2 OS=Homo sapiens<br>OX=9606 GN=PHLDB2 PE=1 SV=2   | 142.1 | 7.1 | 33.8 | 1 | 0.9  | 58.22   | 144 |      |   |      |
| 145 | FBN1_HUMAN  | Fibrillin-1 OS=Homo sapiens OX=9606<br>GN=FBN1 PE=1 SV=4                                              | 312.1 | 4.8 | 33.7 | 1 | 0.4  | 11.52   | 145 |      |   |      |
| 146 | LAMB2_HUMAN | Laminin subunit beta-2 OS=Homo<br>sapiens OX=9606 GN=LAMB2 PE=1<br>SV=2                               | 195.9 | 6.1 | 33.5 | 1 | 0.8  | 659.99  | 146 |      |   |      |

|     |             |                                                                                                |       |     |      |   |      |         |     |  |  |  |
|-----|-------------|------------------------------------------------------------------------------------------------|-------|-----|------|---|------|---------|-----|--|--|--|
| 147 | DCAF1_HUMAN | DDB1- and CUL4-associated factor 1<br>OS=Homo sapiens OX=9606 GN=DCAF1<br>PE=1 SV=3            | 168.9 | 4.9 | 33.4 | 1 | 0.7  | 4.75    | 147 |  |  |  |
| 148 | ASGR2_HUMAN | Asialoglycoprotein receptor 2<br>OS=Homo sapiens OX=9606 GN=ASGR2<br>PE=1 SV=2                 | 35.1  | 5.8 | 33.3 | 1 | 2.3  | 1207.34 | 148 |  |  |  |
| 149 | LAMA3_HUMAN | Laminin subunit alpha-3 OS=Homo<br>sapiens OX=9606 GN=LAMA3 PE=1<br>SV=2                       | 366.4 | 7.0 | 33.3 | 1 | 0.2  | 72.76   | 149 |  |  |  |
| 150 | LV147_HUMAN | Immunoglobulin lambda variable 1-47<br>OS=Homo sapiens OX=9606 GN=IGLV1-<br>47 PE=1 SV=2       | 12.3  | 5.6 | 33.3 | 1 | 11.1 | 42.56   | 150 |  |  |  |
| 151 | FOG2_HUMAN  | Zinc finger protein ZFPM2 OS=Homo<br>sapiens OX=9606 GN=ZFPM2 PE=1<br>SV=3                     | 128.1 | 6.0 | 33.1 | 1 | 1.0  | 35.49   | 151 |  |  |  |
| 152 | SCAFB_HUMAN | Protein SCAF11 OS=Homo sapiens<br>OX=9606 GN=SCAF11 PE=1 SV=2                                  | 164.6 | 8.7 | 32.7 | 2 | 1.3  | 979.89  | 152 |  |  |  |
| 153 | CE170_HUMAN | Centrosomal protein of 170 kDa<br>OS=Homo sapiens OX=9606<br>GN=CEP170 PE=1 SV=1               | 175.2 | 6.6 | 32.7 | 1 | 0.6  | 916.27  | 153 |  |  |  |
| 154 | UN13A_HUMAN | Protein unc-13 homolog A OS=Homo<br>sapiens OX=9606 GN=UNC13A PE=2<br>SV=4                     | 192.9 | 5.2 | 32.4 | 1 | 0.5  | 7.08    | 154 |  |  |  |
| 155 | PPR21_HUMAN | Protein phosphatase 1 regulatory<br>subunit 21 OS=Homo sapiens OX=9606<br>GN=PPP1R21 PE=1 SV=1 | 88.3  | 6.4 | 32.4 | 2 | 2.1  | 920.71  | 155 |  |  |  |
| 156 | BICD1_HUMAN | Protein bicaudal D homolog 1<br>OS=Homo sapiens OX=9606 GN=BICD1<br>PE=1 SV=3                  | 110.7 | 5.6 | 32.3 | 1 | 1.1  | 46.34   | 156 |  |  |  |
| 157 | HEAT3_HUMAN | HEAT repeat-containing protein 3<br>OS=Homo sapiens OX=9606<br>GN=HEATR3 PE=1 SV=2             | 74.5  | 5.0 | 32.2 | 1 | 2.4  | 28.46   | 157 |  |  |  |
| 158 | CC186_HUMAN | Coiled-coil domain-containing protein<br>186 OS=Homo sapiens OX=9606<br>GN=CCDC186 PE=1 SV=2   | 103.6 | 5.9 | 32.1 | 1 | 1.4  | 17.30   | 158 |  |  |  |
| 159 | KV315_HUMAN | Immunoglobulin kappa variable 3-15<br>OS=Homo sapiens OX=9606 GN=IGKV3-<br>15 PE=1 SV=2        | 12.5  | 5.1 | 31.9 | 1 | 7.8  | 40.58   | 159 |  |  |  |
| 160 | NID1_HUMAN  | Nidogen-1 OS=Homo sapiens OX=9606<br>GN=NID1 PE=1 SV=3                                         | 136.3 | 5.1 | 31.9 | 1 | 0.6  | 1116.07 | 160 |  |  |  |
| 161 | CO6A5_HUMAN | Collagen alpha-5(VI) chain OS=Homo<br>sapiens OX=9606 GN=COL6A5 PE=1<br>SV=1                   | 289.7 | 6.5 | 31.8 | 1 | 0.3  | 31.66   | 161 |  |  |  |
| 162 | MBD5_HUMAN  | Methyl-CpG-binding domain protein 5<br>OS=Homo sapiens OX=9606 GN=MBD5<br>PE=1 SV=3            | 159.8 | 9.2 | 31.7 | 2 | 0.7  | 772.53  | 162 |  |  |  |

|     |             |                                                                                                                 |       |     |      |   |     |         |     |      |   |      |
|-----|-------------|-----------------------------------------------------------------------------------------------------------------|-------|-----|------|---|-----|---------|-----|------|---|------|
| 163 | DYH11_HUMAN | Dynein heavy chain 11, axonemal<br>OS=Homo sapiens OX=9606<br>GN=DNAH11 PE=1 SV=4                               | 520.0 | 6.0 | 31.5 | 1 | 0.3 | 27.16   | 163 |      |   |      |
| 164 | ERAP1_HUMAN | Endoplasmic reticulum aminopeptidase<br>1 OS=Homo sapiens OX=9606<br>GN=ERAP1 PE=1 SV=3                         | 107.2 | 6.0 | 31.3 | 1 | 1.1 | 55.25   | 164 |      |   |      |
| 165 | XPO2_HUMAN  | Exportin-2 OS=Homo sapiens OX=9606<br>GN=CSE1L PE=1 SV=3                                                        | 110.3 | 5.5 | 31.3 | 1 | 0.8 | 46.32   | 165 |      |   |      |
| 166 | PHF1_HUMAN  | PHD finger protein 1 OS=Homo sapiens<br>OX=9606 GN=PHF1 PE=1 SV=3                                               | 62.1  | 9.3 | 31.2 | 1 | 1.4 | 6.49    | 166 | 1.42 | 1 | 0.00 |
| 167 | CC033_HUMAN | Protein C3orf33 OS=Homo sapiens<br>OX=9606 GN=C3orf33 PE=1 SV=2                                                 | 33.7  | 9.8 | 30.1 | 1 | 3.1 | 48.99   | 167 |      |   |      |
| 168 | HV349_HUMAN | Immunoglobulin heavy variable 3-49<br>OS=Homo sapiens OX=9606<br>GN=IGHV3-49 PE=3 SV=1                          | 13.0  | 8.8 | 29.9 | 1 | 7.6 | 44.90   | 168 |      |   |      |
| 169 | CDK5_HUMAN  | Cyclin-dependent-like kinase 5<br>OS=Homo sapiens OX=9606 GN=CDK5<br>PE=1 SV=3                                  | 33.3  | 7.6 | 29.4 | 1 | 3.1 | 8.14    | 169 |      |   |      |
| 170 | SH24B_HUMAN | SH2 domain-containing protein 4B<br>OS=Homo sapiens OX=9606<br>GN=SH2D4B PE=2 SV=1                              | 51.2  | 5.9 | 28.9 | 1 | 2.1 | 24.85   | 170 |      |   |      |
| 171 | ATLA1_HUMAN | Atlastin-1 OS=Homo sapiens OX=9606<br>GN=ATL1 PE=1 SV=1                                                         | 63.5  | 5.8 | 28.5 | 1 | 1.6 | 934.45  | 171 |      |   |      |
| 172 | KV401_HUMAN | Immunoglobulin kappa variable 4-1<br>OS=Homo sapiens OX=9606 GN=IGKV4-<br>1 PE=1 SV=1                           | 13.4  | 5.1 | 28.3 | 1 | 7.4 | 41.48   | 172 |      |   |      |
| 173 | TIM_HUMAN   | Protein timeless homolog OS=Homo<br>sapiens OX=9606 GN=TIMELESS PE=1<br>SV=2                                    | 138.6 | 5.3 | 27.9 | 1 | 0.7 | 1154.36 | 173 |      |   |      |
| 174 | RNPC3_HUMAN | RNA-binding region-containing protein<br>3 OS=Homo sapiens OX=9606<br>GN=RNPC3 PE=1 SV=1                        | 58.5  | 7.6 | 27.7 | 1 | 1.9 | 11.57   | 174 |      |   |      |
| 175 | CAC1C_HUMAN | Voltage-dependent L-type calcium<br>channel subunit alpha-1C OS=Homo<br>sapiens OX=9606 GN=CACNA1C PE=1<br>SV=4 | 248.8 | 6.3 | 27.6 | 1 | 0.8 | 47.58   | 175 |      |   |      |
| 176 | PCGF2_HUMAN | Polycomb group RING finger protein 2<br>OS=Homo sapiens OX=9606 GN=PCGF2<br>PE=1 SV=1                           | 37.8  | 8.2 | 27.5 | 1 | 3.5 | 820.74  | 176 |      |   |      |
| 177 | KI16B_HUMAN | Kinesin-like protein KIF16B OS=Homo<br>sapiens OX=9606 GN=KIF16B PE=1<br>SV=2                                   | 151.9 | 5.9 | 27.4 | 1 | 0.7 | 24.39   | 177 |      |   |      |
| 178 | KIF15_HUMAN | Kinesin-like protein KIF15 OS=Homo<br>sapiens OX=9606 GN=KIF15 PE=1 SV=1                                        | 160.1 | 5.7 | 26.6 | 1 | 0.6 | 3.42    | 178 |      |   |      |
| 179 | NDUF2_HUMAN | NADH dehydrogenase [ubiquinone] 1<br>alpha subcomplex assembly factor 2                                         | 19.8  | 8.9 | 26.5 | 1 | 4.1 | 58.85   | 179 |      |   |      |

|     |             |                                                                                                              |       |      |      |   |     |        |     |      |   |      |  |
|-----|-------------|--------------------------------------------------------------------------------------------------------------|-------|------|------|---|-----|--------|-----|------|---|------|--|
|     |             | OS=Homo sapiens OX=9606<br>GN=NDUFAF2 PE=1 SV=1                                                              |       |      |      |   |     |        |     |      |   |      |  |
| 180 | LIPR3_HUMAN | Pancreatic lipase-related protein 3<br>OS=Homo sapiens OX=9606<br>GN=PNLIPRP3 PE=2 SV=2                      | 52.2  | 8.6  | 26.1 | 1 | 1.9 | 27.85  | 180 |      |   |      |  |
| 181 | VWA3A_HUMAN | von Willebrand factor A domain-<br>containing protein 3A OS=Homo<br>sapiens OX=9606 GN=VWA3A PE=2<br>SV=3    | 133.9 | 8.7  | 26.0 | 1 | 0.8 | 35.24  | 181 |      |   |      |  |
| 182 | EZH1_HUMAN  | EZH inhibitory protein OS=Homo<br>sapiens OX=9606 GN=EZH1 PE=1 SV=1                                          | 51.9  | 10.1 | 26.0 | 1 | 2.2 | 946.03 | 182 |      |   |      |  |
| 183 | HOIL1_HUMAN | RanBP-type and C3HC4-type zinc<br>finger-containing protein 1 OS=Homo<br>sapiens OX=9606 GN=RBCK1 PE=1 SV=2  | 57.5  | 5.5  | 26.0 | 1 | 2.2 | 38.57  | 183 |      |   |      |  |
| 184 | CO1A1_HUMAN | Collagen alpha-1(I) chain OS=Homo<br>sapiens OX=9606 GN=COL1A1 PE=1<br>SV=5                                  | 138.9 | 5.6  | 26.0 | 1 | 0.8 | 8.39   | 184 |      |   |      |  |
| 185 | KCC1A_HUMAN | Calcium/calmodulin-dependent protein<br>kinase type 1 OS=Homo sapiens<br>OX=9606 GN=CAMK1 PE=1 SV=1          | 41.3  | 5.1  | 26.0 | 1 | 2.7 | 859.11 | 185 |      |   |      |  |
| 186 | F120A_HUMAN | Constitutive coactivator of PPAR-<br>gamma-like protein 1 OS=Homo<br>sapiens OX=9606 GN=FAM120A PE=1<br>SV=2 | 121.8 | 9.1  | 25.8 | 1 | 1.7 | 20.37  | 186 |      |   |      |  |
| 187 | IGJ_HUMAN   | Immunoglobulin J chain OS=Homo<br>sapiens OX=9606 GN=JCHAIN PE=1<br>SV=4                                     | 18.1  | 5.1  | 25.7 | 1 | 6.9 | 47.22  | 187 |      |   |      |  |
| 188 | CRAD_HUMAN  | Cancer-related regulator of actin<br>dynamics OS=Homo sapiens OX=9606<br>GN=CRAD PE=1 SV=3                   | 136.7 | 5.5  | 25.7 | 1 | 0.7 | 71.79  | 188 |      |   |      |  |
| 189 | ZN831_HUMAN | Zinc finger protein 831 OS=Homo<br>sapiens OX=9606 GN=ZNF831 PE=2<br>SV=4                                    | 177.8 | 8.7  | 25.7 | 1 | 1.0 | 5.91   | 189 | 0.25 | 1 | 0.00 |  |
| 190 | SPKAP_HUMAN | A-kinase anchor protein SPKAP<br>OS=Homo sapiens OX=9606<br>GN=SPKAP PE=1 SV=1                               | 186.3 | 5.0  | 25.6 | 1 | 0.9 | 5.01   | 190 |      |   |      |  |
| 191 | HV313_HUMAN | Immunoglobulin heavy variable 3-13<br>OS=Homo sapiens OX=9606<br>GN=IGHV3-13 PE=1 SV=2                       | 12.5  | 6.5  | 25.5 | 1 | 9.5 | 31.85  | 191 |      |   |      |  |
| 192 | FETUB_HUMAN | Fetuin-B OS=Homo sapiens OX=9606<br>GN=FETUB PE=1 SV=2                                                       | 42.0  | 6.5  | 25.4 | 1 | 2.1 | 45.18  | 192 |      |   |      |  |
| 193 | CO9_HUMAN   | Complement component C9 OS=Homo<br>sapiens OX=9606 GN=C9 PE=1 SV=2                                           | 63.1  | 5.4  | 25.4 | 1 | 2.0 | 47.18  | 193 |      |   |      |  |
| 194 | SPT6H_HUMAN | Transcription elongation factor SPT6<br>OS=Homo sapiens OX=9606<br>GN=SUPT6H PE=1 SV=2                       | 198.9 | 4.8  | 25.3 | 1 | 0.5 | 40.39  | 194 |      |   |      |  |

|     |             |                                                                                                            |       |     |      |   |      |        |     |  |  |
|-----|-------------|------------------------------------------------------------------------------------------------------------|-------|-----|------|---|------|--------|-----|--|--|
| 195 | TM100_HUMAN | Transmembrane protein 100 OS=Homo sapiens OX=9606 GN=TMEM100 PE=1 SV=2                                     | 14.4  | 9.6 | 25.3 | 1 | 9.0  | 19.21  | 195 |  |  |
| 196 | USP9Y_HUMAN | Probable ubiquitin carboxyl-terminal hydrolase FAF-Y OS=Homo sapiens OX=9606 GN=USP9Y PE=2 SV=2            | 290.9 | 5.6 | 25.2 | 1 | 0.5  | 15.69  | 196 |  |  |
| 197 | PCH2_HUMAN  | Pachytene checkpoint protein 2 homolog OS=Homo sapiens OX=9606 GN=TRIP13 PE=1 SV=2                         | 48.5  | 5.7 | 25.1 | 1 | 3.9  | 33.93  | 197 |  |  |
| 198 | RBM19_HUMAN | Probable RNA-binding protein 19 OS=Homo sapiens OX=9606 GN=RBM19 PE=1 SV=3                                 | 107.3 | 6.1 | 25.1 | 1 | 1.0  | 959.63 | 198 |  |  |
| 199 | MYO1H_HUMAN | Unconventional myosin-Ih OS=Homo sapiens OX=9606 GN=MYO1H PE=1 SV=2                                        | 119.0 | 9.2 | 25.0 | 1 | 1.0  | 23.05  | 199 |  |  |
| 200 | ZRAB3_HUMAN | DNA annealing helicase and endonuclease ZRANB3 OS=Homo sapiens OX=9606 GN=ZRANB3 PE=1 SV=2                 | 123.2 | 8.7 | 24.9 | 1 | 1.0  | 57.28  | 200 |  |  |
| 201 | ACADV_HUMAN | Very long-chain specific acyl-CoA dehydrogenase, mitochondrial OS=Homo sapiens OX=9606 GN=ACADVL PE=1 SV=1 | 70.3  | 8.9 | 24.9 | 1 | 1.8  | 789.41 | 201 |  |  |
| 202 | NOS2_HUMAN  | Nitric oxide synthase, inducible OS=Homo sapiens OX=9606 GN=NOS2 PE=1 SV=2                                 | 131.0 | 8.2 | 24.7 | 1 | 1.1  | 48.91  | 202 |  |  |
| 203 | GLYL1_HUMAN | Glycine N-acyltransferase-like protein 1 OS=Homo sapiens OX=9606 GN=GLYATL1 PE=1 SV=1                      | 35.1  | 6.4 | 24.7 | 1 | 3.3  | 12.20  | 203 |  |  |
| 204 | HV551_HUMAN | Immunoglobulin heavy variable 5-51 OS=Homo sapiens OX=9606 GN=IGHV5-51 PE=3 SV=1                           | 12.7  | 8.4 | 24.6 | 1 | 11.1 | 46.88  | 204 |  |  |
| 205 | CSC2A_HUMAN | Protein CASC2, isoform 3 OS=Homo sapiens OX=9606 GN=CASC2 PE=2 SV=1                                        | 11.9  | 8.5 | 24.5 | 1 | 8.8  | 51.21  | 205 |  |  |
| 206 | PTPRM_HUMAN | Receptor-type tyrosine-protein phosphatase mu OS=Homo sapiens OX=9606 GN=PTPRM PE=1 SV=2                   | 163.6 | 6.2 | 24.5 | 1 | 0.8  | 26.11  | 206 |  |  |
| 207 | CD22_HUMAN  | B-cell receptor CD22 OS=Homo sapiens OX=9606 GN=CD22 PE=1 SV=2                                             | 95.3  | 6.2 | 24.4 | 1 | 1.4  | 50.87  | 207 |  |  |
| 208 | WDR7_HUMAN  | WD repeat-containing protein 7 OS=Homo sapiens OX=9606 GN=WDR7 PE=1 SV=2                                   | 163.7 | 6.5 | 24.4 | 1 | 0.5  | 23.73  | 208 |  |  |
| 209 | ZN554_HUMAN | Zinc finger protein 554 OS=Homo sapiens OX=9606 GN=ZNF554 PE=1 SV=1                                        | 60.5  | 7.6 | 24.4 | 1 | 1.5  | 952.43 | 209 |  |  |
| 210 | TSN14_HUMAN | Tetraspanin-14 OS=Homo sapiens OX=9606 GN=TSPAN14 PE=1 SV=1                                                | 30.7  | 6.4 | 24.3 | 1 | 3.0  | 44.90  | 210 |  |  |

|     |             |                                                                                                                              |       |     |      |   |     |         |     |  |  |  |
|-----|-------------|------------------------------------------------------------------------------------------------------------------------------|-------|-----|------|---|-----|---------|-----|--|--|--|
| 211 | KDM1A_HUMAN | Lysine-specific histone demethylase 1A<br>OS=Homo sapiens OX=9606<br>GN=KDM1A PE=1 SV=2                                      | 92.8  | 6.1 | 24.3 | 1 | 1.3 | 771.41  | 211 |  |  |  |
| 212 | GTD2A_HUMAN | General transcription factor II-I repeat<br>domain-containing protein 2A<br>OS=Homo sapiens OX=9606<br>GN=GTF2IRD2 PE=1 SV=3 | 107.1 | 5.5 | 24.3 | 1 | 1.1 | 42.71   | 212 |  |  |  |
| 213 | RGS13_HUMAN | Regulator of G-protein signaling 13<br>OS=Homo sapiens OX=9606 GN=RGS13<br>PE=2 SV=1                                         | 19.1  | 9.1 | 24.1 | 1 | 4.4 | 17.92   | 213 |  |  |  |
| 214 | GEM15_HUMAN | Gem-associated protein 5 OS=Homo<br>sapiens OX=9606 GN=GEMIN5 PE=1<br>SV=3                                                   | 168.5 | 6.2 | 24.1 | 1 | 0.7 | 910.49  | 214 |  |  |  |
| 215 | TAPT1_HUMAN | Transmembrane anterior posterior<br>transformation protein 1 homolog<br>OS=Homo sapiens OX=9606 GN=TAPT1<br>PE=1 SV=1        | 64.2  | 8.6 | 23.9 | 1 | 1.2 | 10.46   | 215 |  |  |  |
| 216 | LRC39_HUMAN | Leucine-rich repeat-containing protein<br>39 OS=Homo sapiens OX=9606<br>GN=LRRC39 PE=1 SV=1                                  | 38.8  | 6.0 | 23.9 | 1 | 2.1 | 1138.93 | 216 |  |  |  |
| 217 | C1S_HUMAN   | Complement C1s subcomponent<br>OS=Homo sapiens OX=9606 GN=C1S<br>PE=1 SV=1                                                   | 76.6  | 4.8 | 23.9 | 1 | 1.2 | 44.45   | 217 |  |  |  |
| 218 | AT10D_HUMAN | Probable phospholipid-transporting<br>ATPase VD OS=Homo sapiens OX=9606<br>GN=ATP10D PE=2 SV=3                               | 160.2 | 6.8 | 23.9 | 1 | 0.8 | 9.45    | 218 |  |  |  |
| 219 | ZN622_HUMAN | Zinc finger protein 622 OS=Homo<br>sapiens OX=9606 GN=ZNF622 PE=1<br>SV=1                                                    | 54.2  | 5.8 | 23.8 | 1 | 2.5 | 811.70  | 219 |  |  |  |
| 220 | THOC6_HUMAN | THO complex subunit 6 homolog<br>OS=Homo sapiens OX=9606 GN=THOC6<br>PE=1 SV=1                                               | 37.5  | 7.1 | 23.7 | 1 | 4.4 | 10.27   | 220 |  |  |  |
| 221 | GGYF2_HUMAN | GRB10-interacting GYF protein 2<br>OS=Homo sapiens OX=9606<br>GN=GIGYF2 PE=1 SV=1                                            | 150.0 | 5.4 | 23.5 | 1 | 1.0 | 26.49   | 221 |  |  |  |
| 222 | RBG10_HUMAN | Rab GTPase-activating protein 1-like,<br>isoform 10 OS=Homo sapiens OX=9606<br>GN=RABGAP1L PE=1 SV=1                         | 29.0  | 5.3 | 23.5 | 1 | 2.8 | 89.22   | 222 |  |  |  |
| 223 | KPYM_HUMAN  | Pyruvate kinase PKM OS=Homo sapiens<br>OX=9606 GN=PKM PE=1 SV=4                                                              | 57.9  | 8.0 | 23.4 | 1 | 2.4 | 47.07   | 223 |  |  |  |
| 224 | CK052_HUMAN | Uncharacterized protein C11orf52<br>OS=Homo sapiens OX=9606<br>GN=C11orf52 PE=1 SV=2                                         | 13.9  | 9.5 | 23.4 | 1 | 8.9 | 30.08   | 224 |  |  |  |
| 225 | RAB21_HUMAN | Ras-related protein Rab-21 OS=Homo<br>sapiens OX=9606 GN=RAB21 PE=1<br>SV=3                                                  | 24.3  | 8.1 | 23.3 | 1 | 6.7 | 43.00   | 225 |  |  |  |

|     |             |                                                                                                                         |       |     |      |   |     |         |     |  |  |  |
|-----|-------------|-------------------------------------------------------------------------------------------------------------------------|-------|-----|------|---|-----|---------|-----|--|--|--|
| 226 | RNF17_HUMAN | RING finger protein 17 OS=Homo sapiens OX=9606 GN=RNF17 PE=1 SV=3                                                       | 184.5 | 5.3 | 23.3 | 1 | 0.6 | 723.70  | 226 |  |  |  |
| 227 | NDUA9_HUMAN | NADH dehydrogenase [ubiquinone] 1 alpha subcomplex subunit 9, mitochondrial OS=Homo sapiens OX=9606 GN=NDUFA9 PE=1 SV=2 | 42.5  | 9.8 | 23.2 | 1 | 2.9 | 19.36   | 227 |  |  |  |
| 228 | RGAP1_HUMAN | Rac GTPase-activating protein 1 OS=Homo sapiens OX=9606 GN=RACGAP1 PE=1 SV=1                                            | 71.0  | 9.1 | 23.1 | 1 | 1.4 | 22.37   | 228 |  |  |  |
| 229 | AOFA_HUMAN  | Amine oxidase [flavin-containing] A OS=Homo sapiens OX=9606 GN=MAOA PE=1 SV=1                                           | 59.6  | 7.9 | 23.1 | 1 | 1.9 | 34.65   | 229 |  |  |  |
| 230 | GCYA1_HUMAN | Guanylate cyclase soluble subunit alpha-1 OS=Homo sapiens OX=9606 GN=GUCY1A1 PE=1 SV=2                                  | 77.4  | 6.7 | 23.1 | 1 | 1.3 | 950.37  | 230 |  |  |  |
| 231 | GALT_HUMAN  | Galactose-1-phosphate uridylyltransferase OS=Homo sapiens OX=9606 GN=GALT PE=1 SV=3                                     | 43.3  | 6.5 | 23.1 | 1 | 2.6 | 40.73   | 231 |  |  |  |
| 232 | ZN696_HUMAN | Zinc finger protein 696 OS=Homo sapiens OX=9606 GN=ZNF696 PE=2 SV=2                                                     | 40.5  | 9.3 | 22.9 | 1 | 2.7 | 1107.95 | 232 |  |  |  |
| 233 | CNTN2_HUMAN | Contactin-2 OS=Homo sapiens OX=9606 GN=CNTN2 PE=1 SV=1                                                                  | 113.3 | 8.1 | 22.9 | 1 | 1.0 | 9.65    | 233 |  |  |  |
| 234 | ABRX2_HUMAN | BRISC complex subunit Abraxas 2 OS=Homo sapiens OX=9606 GN=ABRAXAS2 PE=1 SV=2                                           | 46.9  | 5.8 | 22.9 | 1 | 2.2 | 865.73  | 234 |  |  |  |
| 235 | NKRF_HUMAN  | NF-kappa-B-repressing factor OS=Homo sapiens OX=9606 GN=NKRF PE=1 SV=2                                                  | 77.6  | 8.9 | 22.8 | 1 | 2.0 | 585.37  | 235 |  |  |  |
| 236 | EHBP1_HUMAN | EH domain-binding protein 1 OS=Homo sapiens OX=9606 GN=EHBP1 PE=1 SV=3                                                  | 139.9 | 5.2 | 22.8 | 1 | 0.6 | 46.61   | 236 |  |  |  |
| 237 | KLK11_HUMAN | Kallikrein-11 OS=Homo sapiens OX=9606 GN=KLK11 PE=1 SV=2                                                                | 31.0  | 9.2 | 22.8 | 1 | 6.7 | 448.92  | 237 |  |  |  |
| 238 | ZC12C_HUMAN | Probable ribonuclease ZC3H12C OS=Homo sapiens OX=9606 GN=ZC3H12C PE=1 SV=2                                              | 99.3  | 6.5 | 22.8 | 1 | 1.0 | 25.45   | 238 |  |  |  |
| 239 | PITM2_HUMAN | Membrane-associated phosphatidylinositol transfer protein 2 OS=Homo sapiens OX=9606 GN=PITPNM2 PE=1 SV=1                | 148.8 | 6.7 | 22.6 | 1 | 0.7 | 37.59   | 239 |  |  |  |
| 240 | ATRX_HUMAN  | Transcriptional regulator ATRX OS=Homo sapiens OX=9606 GN=ATRX PE=1 SV=5                                                | 282.4 | 6.2 | 22.6 | 1 | 0.4 | 813.76  | 240 |  |  |  |
| 241 | PLXB3_HUMAN | Plexin-B3 OS=Homo sapiens OX=9606 GN=PLXNB3 PE=1 SV=2                                                                   | 206.7 | 6.0 | 22.4 | 1 | 0.5 | 4.58    | 241 |  |  |  |

|     |              |                                                                                                   |       |     |      |   |      |        |     |  |  |  |
|-----|--------------|---------------------------------------------------------------------------------------------------|-------|-----|------|---|------|--------|-----|--|--|--|
| 242 | HV118_HUMAN  | Immunoglobulin heavy variable 1-18<br>OS=Homo sapiens OX=9606<br>GN=IGHV1-18 PE=3 SV=1            | 12.8  | 9.0 | 22.4 | 1 | 9.4  | 726.41 | 242 |  |  |  |
| 243 | SAA4_HUMAN   | Serum amyloid A-4 protein OS=Homo<br>sapiens OX=9606 GN=SAA4 PE=1 SV=2                            | 14.7  | 9.2 | 22.4 | 1 | 11.5 | 569.86 | 243 |  |  |  |
| 244 | LMAN2_HUMAN  | Vesicular integral-membrane protein<br>VIP36 OS=Homo sapiens OX=9606<br>GN=LMAN2 PE=1 SV=1        | 40.2  | 6.5 | 22.4 | 1 | 2.5  | 32.22  | 244 |  |  |  |
| 245 | TRIPB_HUMAN  | Thyroid receptor-interacting protein 11<br>OS=Homo sapiens OX=9606 GN=TRIP11<br>PE=1 SV=3         | 227.4 | 5.2 | 22.2 | 1 | 0.5  | 32.49  | 245 |  |  |  |
| 246 | SYFB_HUMAN   | Phenylalanine--tRNA ligase beta<br>subunit OS=Homo sapiens OX=9606<br>GN=FARSB PE=1 SV=3          | 66.1  | 6.4 | 22.1 | 1 | 1.2  | 39.92  | 246 |  |  |  |
| 247 | ANR29_HUMAN  | Ankyrin repeat domain-containing<br>protein 29 OS=Homo sapiens OX=9606<br>GN=ANKRD29 PE=2 SV=2    | 32.4  | 9.5 | 22.1 | 1 | 5.3  | 29.78  | 247 |  |  |  |
| 248 | SIR1_HUMAN   | NAD-dependent protein deacetylase<br>sirtuin-1 OS=Homo sapiens OX=9606<br>GN=SIRT1 PE=1 SV=2      | 81.6  | 4.6 | 22.0 | 1 | 1.1  | 23.75  | 248 |  |  |  |
| 249 | IPO11_HUMAN  | Importin-11 OS=Homo sapiens<br>OX=9606 GN=IPO11 PE=1 SV=1                                         | 112.5 | 5.1 | 21.9 | 1 | 1.4  | 552.19 | 249 |  |  |  |
| 250 | CE295_HUMAN  | Centrosomal protein of 295 kDa<br>OS=Homo sapiens OX=9606<br>GN=CEP295 PE=1 SV=4                  | 295.0 | 5.7 | 21.9 | 1 | 0.4  | 692.19 | 250 |  |  |  |
| 251 | APOM_HUMAN   | Apolipoprotein M OS=Homo sapiens<br>OX=9606 GN=APOM PE=1 SV=2                                     | 21.2  | 5.7 | 21.9 | 1 | 3.7  | 46.05  | 251 |  |  |  |
| 252 | CAPR2_HUMAN  | Caprin-2 OS=Homo sapiens OX=9606<br>GN=CAPRIN2 PE=1 SV=1                                          | 125.8 | 6.3 | 21.9 | 1 | 0.6  | 33.85  | 252 |  |  |  |
| 253 | ENKUR_HUMAN  | Enkurin OS=Homo sapiens OX=9606<br>GN=ENKUR PE=2 SV=1                                             | 29.4  | 9.3 | 21.8 | 1 | 5.1  | 6.01   | 253 |  |  |  |
| 254 | TTL11_HUMAN  | Tubulin polyglutamylase TTL11<br>OS=Homo sapiens OX=9606 GN=TTL11<br>PE=1 SV=2                    | 87.6  | 9.1 | 21.8 | 1 | 1.3  | 44.86  | 254 |  |  |  |
| 255 | KIF26A_HUMAN | Kinesin-like protein KIF26A OS=Homo<br>sapiens OX=9606 GN=KIF26A PE=1<br>SV=3                     | 194.5 | 9.1 | 21.7 | 1 | 0.6  | 692.36 | 255 |  |  |  |
| 256 | GP155_HUMAN  | Integral membrane protein GPR155<br>OS=Homo sapiens OX=9606<br>GN=GPR155 PE=2 SV=2                | 96.9  | 6.4 | 21.6 | 1 | 1.6  | 560.77 | 256 |  |  |  |
| 257 | DSE_HUMAN    | Dermatan-sulfate epimerase OS=Homo<br>sapiens OX=9606 GN=DSE PE=1 SV=1                            | 109.7 | 8.2 | 21.6 | 1 | 0.8  | 38.00  | 257 |  |  |  |
| 258 | PDS5A_HUMAN  | Sister chromatid cohesion protein PDS5<br>homolog A OS=Homo sapiens OX=9606<br>GN=PDS5A PE=1 SV=1 | 150.7 | 8.2 | 21.6 | 1 | 0.5  | 42.95  | 258 |  |  |  |



|     |             |                                                                                                                  |       |      |      |   |      |        |     |  |  |
|-----|-------------|------------------------------------------------------------------------------------------------------------------|-------|------|------|---|------|--------|-----|--|--|
| 259 | YT001_HUMAN | Putative uncharacterized protein<br>PRO0628 OS=Homo sapiens OX=9606<br>GN=PRO0628 PE=5 SV=1                      | 6.4   | 10.3 | 21.5 | 1 | 18.2 | 75.91  | 259 |  |  |
| 260 | HNRPU_HUMAN | Heterogeneous nuclear<br>ribonucleoprotein U OS=Homo sapiens<br>OX=9606 GN=HNRNPU PE=1 SV=6                      | 90.5  | 5.8  | 21.5 | 1 | 1.2  | 26.70  | 260 |  |  |
| 261 | WNT16_HUMAN | Protein Wnt-16 OS=Homo sapiens<br>OX=9606 GN=WNT16 PE=2 SV=1                                                     | 40.7  | 9.0  | 21.5 | 1 | 3.8  | 553.87 | 261 |  |  |
| 262 | TEN4_HUMAN  | Teneurin-4 OS=Homo sapiens OX=9606<br>GN=TENM4 PE=1 SV=2                                                         | 307.8 | 6.1  | 21.4 | 1 | 0.3  | 26.50  | 262 |  |  |
| 263 | CA137_HUMAN | Putative uncharacterized protein<br>C1orf137 OS=Homo sapiens OX=9606<br>GN=C1orf137 PE=4 SV=1                    | 11.0  | 7.6  | 21.4 | 1 | 9.2  | 931.56 | 263 |  |  |
| 264 | MPP5_HUMAN  | MAGUK p55 subfamily member 5<br>OS=Homo sapiens OX=9606 GN=MPP5<br>PE=1 SV=3                                     | 77.2  | 5.8  | 21.4 | 1 | 1.5  | 876.81 | 264 |  |  |
| 265 | DCTN5_HUMAN | Dynactin subunit 5 OS=Homo sapiens<br>OX=9606 GN=DCTN5 PE=1 SV=1                                                 | 20.1  | 8.3  | 21.4 | 1 | 5.5  | 761.46 | 265 |  |  |
| 266 | LRC41_HUMAN | Leucine-rich repeat-containing protein<br>41 OS=Homo sapiens OX=9606<br>GN=LRRC41 PE=1 SV=3                      | 88.6  | 8.8  | 21.3 | 1 | 1.2  | 17.59  | 266 |  |  |
| 267 | BMP15_HUMAN | Bone morphogenetic protein 15<br>OS=Homo sapiens OX=9606<br>GN=BMP15 PE=1 SV=2                                   | 45.0  | 9.3  | 21.3 | 1 | 2.6  | 26.96  | 267 |  |  |
| 268 | SSU72_HUMAN | RNA polymerase II subunit A C-terminal<br>domain phosphatase SSU72 OS=Homo<br>sapiens OX=9606 GN=SSU72 PE=1 SV=1 | 22.6  | 5.2  | 21.1 | 1 | 3.6  | 69.21  | 268 |  |  |
| 269 | IMA1_HUMAN  | Importin subunit alpha-1 OS=Homo<br>sapiens OX=9606 GN=KPNA2 PE=1<br>SV=1                                        | 57.8  | 5.3  | 21.1 | 1 | 1.7  | 848.72 | 269 |  |  |
| 270 | AHDC1_HUMAN | AT-hook DNA-binding motif-containing<br>protein 1 OS=Homo sapiens OX=9606<br>GN=AHDC1 PE=1 SV=1                  | 168.2 | 9.2  | 21.1 | 1 | 0.7  | 770.09 | 270 |  |  |
| 271 | HEP2_HUMAN  | Heparin cofactor 2 OS=Homo sapiens<br>OX=9606 GN=SERPIND1 PE=1 SV=3                                              | 57.0  | 6.4  | 21.1 | 1 | 1.8  | 47.44  | 271 |  |  |
| 272 | TEKT4_HUMAN | Tektin-4 OS=Homo sapiens OX=9606<br>GN=TEKT4 PE=1 SV=1                                                           | 50.6  | 6.0  | 21.0 | 1 | 2.3  | 57.55  | 272 |  |  |
| 273 | TTC7B_HUMAN | Tetratricopeptide repeat protein 7B<br>OS=Homo sapiens OX=9606 GN=TTC7B<br>PE=1 SV=3                             | 94.1  | 6.4  | 21.0 | 1 | 2.5  | 29.28  | 273 |  |  |
| 274 | KCNA4_HUMAN | Potassium voltage-gated channel<br>subfamily A member 4 OS=Homo<br>sapiens OX=9606 GN=KCNA4 PE=1<br>SV=2         | 73.2  | 5.1  | 21.0 | 1 | 2.3  | 628.34 | 274 |  |  |
| 275 | CBPC5_HUMAN | Cytosolic carboxypeptidase-like protein<br>5 OS=Homo sapiens OX=9606<br>GN=AGBL5 PE=1 SV=1                       | 97.5  | 9.3  | 21.0 | 1 | 1.2  | 811.87 | 275 |  |  |

|     |             |                                                                                                       |       |      |      |   |     |         |     |  |  |
|-----|-------------|-------------------------------------------------------------------------------------------------------|-------|------|------|---|-----|---------|-----|--|--|
| 276 | ZN624_HUMAN | Zinc finger protein 624 OS=Homo sapiens OX=9606 GN=ZNF624 PE=1 SV=3                                   | 99.9  | 9.1  | 20.9 | 1 | 1.2 | 63.70   | 276 |  |  |
| 277 | FURIN_HUMAN | Furin OS=Homo sapiens OX=9606 GN=FURIN PE=1 SV=2                                                      | 86.6  | 6.0  | 20.9 | 1 | 1.0 | 58.63   | 277 |  |  |
| 278 | ZN197_HUMAN | Zinc finger protein 197 OS=Homo sapiens OX=9606 GN=ZNF197 PE=2 SV=1                                   | 118.8 | 8.9  | 20.7 | 1 | 0.7 | 1110.09 | 278 |  |  |
| 279 | RS4X_HUMAN  | 40S ribosomal protein S4, X isoform OS=Homo sapiens OX=9606 GN=RPS4X PE=1 SV=2                        | 29.6  | 10.2 | 20.7 | 1 | 3.8 | 57.58   | 279 |  |  |
| 280 | MRM2_HUMAN  | rRNA methyltransferase 2, mitochondrial OS=Homo sapiens OX=9606 GN=MRM2 PE=1 SV=1                     | 27.4  | 9.6  | 20.6 | 1 | 2.8 | 1068.81 | 280 |  |  |
| 281 | XPO1_HUMAN  | Exportin-1 OS=Homo sapiens OX=9606 GN=XPO1 PE=1 SV=1                                                  | 123.3 | 5.7  | 20.6 | 1 | 0.8 | 799.59  | 281 |  |  |
| 282 | UT14C_HUMAN | U3 small nucleolar RNA-associated protein 14 homolog C OS=Homo sapiens OX=9606 GN=UTP14C PE=1 SV=1    | 87.1  | 6.7  | 20.6 | 1 | 1.0 | 6.91    | 282 |  |  |
| 283 | TM246_HUMAN | Transmembrane protein 246 OS=Homo sapiens OX=9606 GN=TMEM246 PE=1 SV=1                                | 46.6  | 7.3  | 20.5 | 1 | 2.2 | 892.24  | 283 |  |  |
| 284 | DCR1A_HUMAN | DNA cross-link repair 1A protein OS=Homo sapiens OX=9606 GN=DCLRE1A PE=1 SV=3                         | 116.3 | 8.2  | 20.5 | 1 | 1.3 | 15.53   | 284 |  |  |
| 285 | ZN184_HUMAN | Zinc finger protein 184 OS=Homo sapiens OX=9606 GN=ZNF184 PE=1 SV=4                                   | 86.1  | 8.4  | 20.5 | 1 | 1.2 | 981.00  | 285 |  |  |
| 286 | SNP29_HUMAN | Synaptosomal-associated protein 29 OS=Homo sapiens OX=9606 GN=SNAP29 PE=1 SV=1                        | 29.0  | 5.6  | 20.3 | 1 | 4.7 | 718.11  | 286 |  |  |
| 287 | AP1S3_HUMAN | AP-1 complex subunit sigma-3 OS=Homo sapiens OX=9606 GN=AP1S3 PE=1 SV=1                               | 18.3  | 6.3  | 20.3 | 1 | 5.8 | 28.09   | 287 |  |  |
| 288 | IMPG1_HUMAN | Interphotoreceptor matrix proteoglycan 1 OS=Homo sapiens OX=9606 GN=IMPG1 PE=1 SV=2                   | 89.3  | 4.8  | 20.3 | 1 | 1.0 | 65.60   | 288 |  |  |
| 289 | MEF2B_HUMAN | Myocyte-specific enhancer factor 2B OS=Homo sapiens OX=9606 GN=MEF2B PE=1 SV=2                        | 38.6  | 9.6  | 20.3 | 1 | 2.5 | 1149.64 | 289 |  |  |
| 290 | LCORL_HUMAN | Ligand-dependent nuclear receptor corepressor-like protein OS=Homo sapiens OX=9606 GN=LCORL PE=1 SV=4 | 66.9  | 8.2  | 20.3 | 1 | 1.5 | 916.84  | 290 |  |  |
| 291 | LIMK1_HUMAN | LIM domain kinase 1 OS=Homo sapiens OX=9606 GN=LIMK1 PE=1 SV=3                                        | 72.5  | 6.5  | 20.3 | 1 | 3.1 | 27.06   | 291 |  |  |

|     |              |                                                                                                   |       |     |      |   |     |         |     |      |   |      |
|-----|--------------|---------------------------------------------------------------------------------------------------|-------|-----|------|---|-----|---------|-----|------|---|------|
| 292 | RLGPB_HUMAN  | Ral GTPase-activating protein subunit beta OS=Homo sapiens OX=9606 GN=RALGAPB PE=1 SV=1           | 166.7 | 6.3 | 20.2 | 1 | 0.7 | 54.22   | 292 |      |   |      |
| 293 | KR87P_HUMAN  | Putative keratin-87 protein OS=Homo sapiens OX=9606 GN=KRT87P PE=5 SV=4                           | 29.1  | 5.6 | 20.2 | 1 | 4.3 | 26.63   | 293 |      |   |      |
| 294 | DNMT1_HUMAN  | DNA (cytosine-5)-methyltransferase 1 OS=Homo sapiens OX=9606 GN=DNMT1 PE=1 SV=2                   | 183.0 | 8.0 | 20.2 | 1 | 1.2 | 4.35    | 294 |      |   |      |
| 295 | PHX2A_HUMAN  | Paired mesoderm homeobox protein 2A OS=Homo sapiens OX=9606 GN=PHOX2A PE=1 SV=2                   | 29.6  | 9.0 | 20.2 | 1 | 3.5 | 27.02   | 295 |      |   |      |
| 296 | EFC4B_HUMAN  | EF-hand calcium-binding domain-containing protein 4B OS=Homo sapiens OX=9606 GN=CRACR2A PE=1 SV=1 | 45.6  | 4.9 | 20.2 | 1 | 2.5 | 16.97   | 296 | 1.50 | 1 | 0.00 |
| 297 | TLK1_HUMAN   | Serine/threonine-protein kinase tousled-like 1 OS=Homo sapiens OX=9606 GN=TLK1 PE=1 SV=2          | 86.6  | 8.9 | 20.1 | 1 | 1.0 | 1084.07 | 297 |      |   |      |
| 298 | CLMP_HUMAN   | CXADR-like membrane protein OS=Homo sapiens OX=9606 GN=CLMP PE=1 SV=1                             | 41.3  | 8.1 | 20.0 | 1 | 3.5 | 678.74  | 298 |      |   |      |
| 299 | NU205_HUMAN  | Nuclear pore complex protein Nup205 OS=Homo sapiens OX=9606 GN=NUP205 PE=1 SV=3                   | 227.8 | 5.8 | 20.0 | 1 | 0.4 | 922.75  | 299 | 1.08 | 1 | 0.00 |
| 300 | MFN2_HUMAN   | Mitofusin-2 OS=Homo sapiens OX=9606 GN=MFN2 PE=1 SV=3                                             | 86.3  | 6.5 | 20.0 | 1 | 2.8 | 0.22    | 300 |      |   |      |
| 301 | NUDT15_HUMAN | Nucleotide triphosphate diphosphatase NUDT15 OS=Homo sapiens OX=9606 GN=NUDT15 PE=1 SV=1          | 18.6  | 5.7 | 20.0 | 1 | 5.5 | 34.92   | 301 |      |   |      |
| 302 | TGT_HUMAN    | Queuine tRNA-ribosyltransferase catalytic subunit 1 OS=Homo sapiens OX=9606 GN=QTRT1 PE=1 SV=3    | 44.0  | 6.8 | 20.0 | 1 | 2.2 | 912.71  | 302 |      |   |      |
| 303 | DPOD2_HUMAN  | DNA polymerase delta subunit 2 OS=Homo sapiens OX=9606 GN=POLD2 PE=1 SV=1                         | 51.3  | 5.3 | 19.9 | 1 | 1.9 | 995.80  | 303 |      |   |      |
| 304 | FBLN1_HUMAN  | Fibulin-1 OS=Homo sapiens OX=9606 GN=FBLN1 PE=1 SV=4                                              | 77.2  | 5.1 | 19.9 | 1 | 1.4 | 878.42  | 304 |      |   |      |
| 305 | CCHCR_HUMAN  | Coiled-coil alpha-helical rod protein 1 OS=Homo sapiens OX=9606 GN=CCHCR1 PE=1 SV=2               | 88.6  | 5.8 | 19.9 | 1 | 1.2 | 28.10   | 305 |      |   |      |
| 306 | ATP4A_HUMAN  | Potassium-transporting ATPase alpha chain 1 OS=Homo sapiens OX=9606 GN=ATP4A PE=2 SV=5            | 114.0 | 5.6 | 19.9 | 1 | 2.0 | 23.00   | 306 |      |   |      |
| 307 | KANL1_HUMAN  | KAT8 regulatory NSL complex subunit 1 OS=Homo sapiens OX=9606 GN=KANSL1 PE=1 SV=2                 | 121.0 | 9.0 | 19.9 | 1 | 1.5 | 12.11   | 307 |      |   |      |

|     |              |                                                                                                       |       |      |      |   |      |         |     |      |   |      |
|-----|--------------|-------------------------------------------------------------------------------------------------------|-------|------|------|---|------|---------|-----|------|---|------|
| 308 | U520_HUMAN   | U5 small nuclear ribonucleoprotein 200 kDa helicase OS=Homo sapiens OX=9606 GN=SNRNP200 PE=1 SV=2     | 244.4 | 5.7  | 19.8 | 1 | 0.5  | 717.45  | 308 |      |   |      |
| 309 | GFAP_HUMAN   | Glial fibrillary acidic protein OS=Homo sapiens OX=9606 GN=GFAP PE=1 SV=1                             | 49.8  | 5.4  | 19.8 | 1 | 2.5  | 48.31   | 309 |      |   |      |
| 310 | VIR_HUMAN    | Protein virilizer homolog OS=Homo sapiens OX=9606 GN=VIRMA PE=1 SV=2                                  | 201.9 | 4.9  | 19.7 | 1 | 0.4  | 52.40   | 310 |      |   |      |
| 311 | KVD13_HUMAN  | Immunoglobulin kappa variable 1D-13 OS=Homo sapiens OX=9606 GN=IGKV1D-13 PE=3 SV=1                    | 12.6  | 7.7  | 19.7 | 1 | 13.7 | 44.55   | 311 |      |   |      |
| 312 | IPRI_HUMAN   | Inositol 1,4,5-trisphosphate receptor-interacting protein OS=Homo sapiens OX=9606 GN=ITPRIP PE=1 SV=1 | 62.0  | 5.6  | 19.7 | 1 | 2.2  | 58.15   | 312 |      |   |      |
| 313 | MECP2_HUMAN  | Methyl-CpG-binding protein 2 OS=Homo sapiens OX=9606 GN=MECP2 PE=1 SV=1                               | 52.4  | 10.0 | 19.7 | 1 | 2.1  | 844.05  | 313 |      |   |      |
| 314 | NUMBL_HUMAN  | Numb-like protein OS=Homo sapiens OX=9606 GN=NUMBL PE=1 SV=1                                          | 64.9  | 9.1  | 19.7 | 1 | 2.0  | 3.60    | 314 |      |   |      |
| 315 | SEC61G_HUMAN | Protein transport protein Sec61 subunit gamma OS=Homo sapiens OX=9606 GN=SEC61G PE=1 SV=1             | 7.7   | 10.0 | 19.6 | 1 | 17.6 | 635.74  | 315 |      |   |      |
| 316 | RL21_HUMAN   | 60S ribosomal protein L21 OS=Homo sapiens OX=9606 GN=RPL21 PE=1 SV=2                                  | 18.6  | 10.5 | 19.6 | 1 | 4.4  | 1225.37 | 316 |      |   |      |
| 317 | P5F1B_HUMAN  | Putative POU domain, class 5, transcription factor 1B OS=Homo sapiens OX=9606 GN=POU5F1B PE=5 SV=2    | 38.6  | 6.3  | 19.6 | 1 | 2.5  | 15.49   | 317 |      |   |      |
| 318 | STX8_HUMAN   | Syntaxin-8 OS=Homo sapiens OX=9606 GN=STX8 PE=1 SV=2                                                  | 26.9  | 4.9  | 19.6 | 1 | 4.2  | 21.88   | 318 |      |   |      |
| 319 | MTUS1_HUMAN  | Microtubule-associated tumor suppressor 1 OS=Homo sapiens OX=9606 GN=MTUS1 PE=1 SV=2                  | 141.3 | 7.3  | 19.6 | 1 | 0.8  | 8.45    | 319 | 1.50 | 1 | 0.00 |
| 320 | DMD_HUMAN    | Dystrophin OS=Homo sapiens OX=9606 GN=DMD PE=1 SV=3                                                   | 426.5 | 5.6  | 19.5 | 1 | 0.2  | 33.90   | 320 |      |   |      |
| 321 | SLN11_HUMAN  | Schlafen family member 11 OS=Homo sapiens OX=9606 GN=SLFN11 PE=1 SV=2                                 | 102.8 | 8.0  | 19.5 | 1 | 1.2  | 651.15  | 321 |      |   |      |
| 322 | PKN2_HUMAN   | Serine/threonine-protein kinase N2 OS=Homo sapiens OX=9606 GN=PKN2 PE=1 SV=1                          | 112.0 | 5.9  | 19.5 | 1 | 0.9  | 50.96   | 322 |      |   |      |
| 323 | CHSTF_HUMAN  | Carbohydrate sulfotransferase 15 OS=Homo sapiens OX=9606 GN=CHST15 PE=1 SV=1                          | 64.9  | 8.6  | 19.4 | 1 | 1.4  | 59.66   | 323 |      |   |      |
| 324 | CTIP_HUMAN   | DNA endonuclease RBBP8 OS=Homo sapiens OX=9606 GN=RBBP8 PE=1 SV=2                                     | 101.9 | 5.9  | 19.4 | 1 | 1.0  | 42.00   | 324 |      |   |      |

|     |             |                                                                                                        |       |     |      |   |     |         |     |  |  |
|-----|-------------|--------------------------------------------------------------------------------------------------------|-------|-----|------|---|-----|---------|-----|--|--|
| 325 | MS18B_HUMAN | Protein Mis18-beta OS=Homo sapiens<br>OX=9606 GN=OIP5 PE=1 SV=2                                        | 24.7  | 7.0 | 19.4 | 1 | 3.1 | 1222.57 | 325 |  |  |
| 326 | I20RB_HUMAN | Interleukin-20 receptor subunit beta<br>OS=Homo sapiens OX=9606 GN=IL20RB<br>PE=1 SV=1                 | 35.1  | 5.0 | 19.4 | 1 | 2.3 | 42.82   | 326 |  |  |
| 327 | TLRN1_HUMAN | Talin rod domain-containing protein 1<br>OS=Homo sapiens OX=9606<br>GN=TLNRD1 PE=1 SV=1                | 37.7  | 8.5 | 19.4 | 1 | 2.2 | 1.94    | 327 |  |  |
| 328 | AFG32_HUMAN | AFG3-like protein 2 OS=Homo sapiens<br>OX=9606 GN=AFG3L2 PE=1 SV=2                                     | 88.5  | 8.8 | 19.4 | 1 | 1.0 | 101.83  | 328 |  |  |
| 329 | GRM4_HUMAN  | Metabotropic glutamate receptor 4<br>OS=Homo sapiens OX=9606 GN=GRM4<br>PE=2 SV=1                      | 101.8 | 9.1 | 19.4 | 1 | 1.2 | 20.62   | 329 |  |  |
| 330 | FCGBP_HUMAN | IgGfc-binding protein OS=Homo<br>sapiens OX=9606 GN=FCGBP PE=1<br>SV=3                                 | 571.6 | 5.1 | 19.4 | 1 | 0.1 | 59.25   | 330 |  |  |
| 331 | C19L2_HUMAN | CWF19-like protein 2 OS=Homo<br>sapiens OX=9606 GN=CWF19L2 PE=1<br>SV=4                                | 103.7 | 8.8 | 19.4 | 1 | 1.6 | 0.86    | 331 |  |  |
| 332 | PPIH_HUMAN  | Peptidyl-prolyl cis-trans isomerase H<br>OS=Homo sapiens OX=9606 GN=PPIH<br>PE=1 SV=1                  | 19.2  | 8.3 | 19.3 | 1 | 6.2 | 54.19   | 332 |  |  |
| 333 | ACTBL_HUMAN | Beta-actin-like protein 2 OS=Homo<br>sapiens OX=9606 GN=ACTBL2 PE=1<br>SV=2                            | 42.0  | 5.4 | 19.2 | 1 | 2.9 | 763.63  | 333 |  |  |
| 334 | RCC1_HUMAN  | Regulator of chromosome<br>condensation OS=Homo sapiens<br>OX=9606 GN=RCC1 PE=1 SV=1                   | 44.9  | 7.2 | 19.2 | 1 | 2.1 | 3.45    | 334 |  |  |
| 335 | HACD2_HUMAN | Very-long-chain (3R)-3-hydroxyacyl-<br>CoA dehydratase 2 OS=Homo sapiens<br>OX=9606 GN=HACD2 PE=1 SV=1 | 28.4  | 9.6 | 19.2 | 1 | 4.3 | 23.75   | 335 |  |  |
| 336 | UAP1_HUMAN  | UDP-N-acetylhexosamine<br>pyrophosphorylase OS=Homo sapiens<br>OX=9606 GN=UAP1 PE=1 SV=3               | 58.7  | 5.9 | 19.2 | 1 | 2.1 | 15.47   | 336 |  |  |
| 337 | AUP1_HUMAN  | Ancient ubiquitous protein 1 OS=Homo<br>sapiens OX=9606 GN=AUP1 PE=1 SV=2                              | 45.8  | 9.0 | 19.1 | 1 | 2.0 | 45.09   | 337 |  |  |
| 338 | ANTR1_HUMAN | Anthrax toxin receptor 1 OS=Homo<br>sapiens OX=9606 GN=ANTXR1 PE=1<br>SV=2                             | 62.7  | 7.5 | 19.1 | 1 | 2.0 | 49.22   | 338 |  |  |
| 339 | WDR26_HUMAN | WD repeat-containing protein 26<br>OS=Homo sapiens OX=9606<br>GN=WDR26 PE=1 SV=3                       | 72.1  | 5.7 | 19.1 | 1 | 1.7 | 3.88    | 339 |  |  |
| 340 | ASHWN_HUMAN | Ashwin OS=Homo sapiens OX=9606<br>GN=C2orf49 PE=1 SV=1                                                 | 25.8  | 9.8 | 19.1 | 1 | 3.9 | 35.20   | 340 |  |  |
| 341 | FA83G_HUMAN | Protein FAM83G OS=Homo sapiens<br>OX=9606 GN=FAM83G PE=1 SV=2                                          | 90.8  | 6.0 | 19.1 | 1 | 1.1 | 40.16   | 341 |  |  |

|     |             |                                                                                                                      |       |     |      |   |     |         |     |  |  |
|-----|-------------|----------------------------------------------------------------------------------------------------------------------|-------|-----|------|---|-----|---------|-----|--|--|
| 342 | NEDD4_HUMAN | E3 ubiquitin-protein ligase NEDD4<br>OS=Homo sapiens OX=9606<br>GN=NEDD4 PE=1 SV=4                                   | 149.0 | 6.1 | 19.1 | 1 | 0.8 | 7.85    | 342 |  |  |
| 343 | ESR2_HUMAN  | Estrogen receptor beta OS=Homo<br>sapiens OX=9606 GN=ESR2 PE=1 SV=2                                                  | 59.2  | 8.8 | 19.1 | 1 | 1.7 | 1100.41 | 343 |  |  |
| 344 | AP5Z1_HUMAN | AP-5 complex subunit zeta-1 OS=Homo<br>sapiens OX=9606 GN=AP5Z1 PE=1 SV=2                                            | 88.5  | 6.6 | 19.1 | 1 | 0.9 | 1057.38 | 344 |  |  |
| 345 | NOE1_HUMAN  | Noelin OS=Homo sapiens OX=9606<br>GN=OLFM1 PE=1 SV=4                                                                 | 55.3  | 6.5 | 19.1 | 1 | 2.3 | 8.81    | 345 |  |  |
| 346 | MMP2_HUMAN  | 72 kDa type IV collagenase OS=Homo<br>sapiens OX=9606 GN=MMP2 PE=1<br>SV=2                                           | 73.8  | 5.3 | 19.0 | 1 | 1.4 | 998.94  | 346 |  |  |
| 347 | ANKZ1_HUMAN | Ankyrin repeat and zinc finger domain-<br>containing protein 1 OS=Homo sapiens<br>OX=9606 GN=ANKZF1 PE=1 SV=1        | 80.9  | 8.7 | 19.0 | 1 | 1.4 | 946.44  | 347 |  |  |
| 348 | MROH5_HUMAN | Maestro heat-like repeat family<br>member 5 OS=Homo sapiens OX=9606<br>GN=MROH5 PE=2 SV=2                            | 149.0 | 7.6 | 19.0 | 1 | 0.5 | 74.76   | 348 |  |  |
| 349 | FXDC2_HUMAN | Fatty acid hydroxylase domain-<br>containing protein 2 OS=Homo sapiens<br>OX=9606 GN=FAXDC2 PE=2 SV=1                | 39.0  | 9.0 | 19.0 | 1 | 3.0 | 777.63  | 349 |  |  |
| 350 | M3K6_HUMAN  | Mitogen-activated protein kinase<br>kinase kinase 6 OS=Homo sapiens<br>OX=9606 GN=MAP3K6 PE=1 SV=3                   | 142.5 | 6.7 | 19.0 | 1 | 0.7 | 19.14   | 350 |  |  |
| 351 | MYO5C_HUMAN | Unconventional myosin-Vc OS=Homo<br>sapiens OX=9606 GN=MYO5C PE=1<br>SV=2                                            | 202.7 | 7.7 | 19.0 | 1 | 0.5 | 1058.56 | 351 |  |  |
| 352 | PAR15_HUMAN | Protein mono-ADP-ribosyltransferase<br>PARP15 OS=Homo sapiens OX=9606<br>GN=PARP15 PE=1 SV=2                         | 74.5  | 9.0 | 19.0 | 1 | 2.1 | 552.74  | 352 |  |  |
| 353 | CP072_HUMAN | UPF0472 protein C16orf72 OS=Homo<br>sapiens OX=9606 GN=C16orf72 PE=1<br>SV=1                                         | 30.9  | 7.8 | 18.9 | 1 | 2.9 | 15.77   | 353 |  |  |
| 354 | SMC1A_HUMAN | Structural maintenance of<br>chromosomes protein 1A OS=Homo<br>sapiens OX=9606 GN=SMC1A PE=1<br>SV=2                 | 143.1 | 7.5 | 18.9 | 1 | 0.8 | 57.15   | 354 |  |  |
| 355 | CRK_HUMAN   | Adapter molecule crk OS=Homo<br>sapiens OX=9606 GN=CRK PE=1 SV=2                                                     | 33.8  | 5.4 | 18.9 | 1 | 3.9 | 33.61   | 355 |  |  |
| 356 | RIC3_HUMAN  | Protein RIC-3 OS=Homo sapiens<br>OX=9606 GN=RIC3 PE=1 SV=1                                                           | 41.1  | 5.0 | 18.9 | 1 | 2.2 | 1150.70 | 356 |  |  |
| 357 | SUCB1_HUMAN | Succinate--CoA ligase [ADP-forming]<br>subunit beta, mitochondrial OS=Homo<br>sapiens OX=9606 GN=SUCLA2 PE=1<br>SV=3 | 50.3  | 7.0 | 18.9 | 1 | 1.7 | 88.17   | 357 |  |  |

|     |             |                                                                                                                                  |       |     |      |   |      |        |     |  |  |
|-----|-------------|----------------------------------------------------------------------------------------------------------------------------------|-------|-----|------|---|------|--------|-----|--|--|
| 358 | GHDC_HUMAN  | GH3 domain-containing protein<br>OS=Homo sapiens OX=9606 GN=GHDC<br>PE=1 SV=2                                                    | 57.5  | 8.1 | 18.9 | 1 | 1.5  | 29.23  | 358 |  |  |
| 359 | SOGA3_HUMAN | Protein SOGA3 OS=Homo sapiens<br>OX=9606 GN=SOGA3 PE=3 SV=1                                                                      | 103.1 | 5.8 | 18.8 | 1 | 1.5  | 25.67  | 359 |  |  |
| 360 | CJ067_HUMAN | Uncharacterized protein C10orf67,<br>mitochondrial OS=Homo sapiens<br>OX=9606 GN=C10orf67 PE=1 SV=3                              | 63.6  | 8.9 | 18.8 | 1 | 1.6  | 24.37  | 360 |  |  |
| 361 | PAI1_HUMAN  | Plasminogen activator inhibitor 1<br>OS=Homo sapiens OX=9606<br>GN=SERPINE1 PE=1 SV=1                                            | 45.0  | 6.7 | 18.7 | 1 | 2.5  | 55.01  | 361 |  |  |
| 362 | FRITZ_HUMAN | WD repeat-containing and planar cell<br>polarity effector protein fritz homolog<br>OS=Homo sapiens OX=9606<br>GN=WDPCP PE=1 SV=2 | 85.0  | 6.0 | 18.7 | 1 | 1.1  | 70.59  | 362 |  |  |
| 363 | TSN12_HUMAN | Tetraspanin-12 OS=Homo sapiens<br>OX=9606 GN=TSPAN12 PE=1 SV=1                                                                   | 35.4  | 5.7 | 18.7 | 1 | 3.6  | 42.01  | 363 |  |  |
| 364 | SUMO1_HUMAN | Small ubiquitin-related modifier 1<br>OS=Homo sapiens OX=9606<br>GN=SUMO1 PE=1 SV=1                                              | 11.5  | 5.3 | 18.7 | 1 | 15.8 | 30.82  | 364 |  |  |
| 365 | SGCG_HUMAN  | Gamma-sarcoglycan OS=Homo sapiens<br>OX=9606 GN=SGCG PE=1 SV=4                                                                   | 32.4  | 5.6 | 18.7 | 1 | 3.8  | 810.34 | 365 |  |  |
| 366 | DOCK4_HUMAN | Dedicator of cytokinesis protein 4<br>OS=Homo sapiens OX=9606<br>GN=DOCK4 PE=1 SV=3                                              | 225.1 | 7.6 | 18.7 | 1 | 0.6  | 21.80  | 366 |  |  |
| 367 | WAPL_HUMAN  | Wings apart-like protein homolog<br>OS=Homo sapiens OX=9606 GN=WAPL<br>PE=1 SV=1                                                 | 132.9 | 5.3 | 18.7 | 1 | 0.8  | 940.22 | 367 |  |  |
| 368 | ARIP4_HUMAN | Helicase ARIP4 OS=Homo sapiens<br>OX=9606 GN=RAD54L2 PE=1 SV=4                                                                   | 162.7 | 5.7 | 18.7 | 1 | 0.6  | 65.94  | 368 |  |  |
| 369 | SLTM_HUMAN  | SAFB-like transcription modulator<br>OS=Homo sapiens OX=9606 GN=SLTM<br>PE=1 SV=2                                                | 117.1 | 7.7 | 18.7 | 1 | 1.0  | 48.14  | 369 |  |  |
| 370 | BIG3_HUMAN  | Brefeldin A-inhibited guanine<br>nucleotide-exchange protein 3<br>OS=Homo sapiens OX=9606<br>GN=ARFGEF3 PE=1 SV=3                | 240.5 | 5.5 | 18.7 | 1 | 0.4  | 26.52  | 370 |  |  |
| 371 | PAR14_HUMAN | Protein mono-ADP-ribosyltransferase<br>PARP14 OS=Homo sapiens OX=9606<br>GN=PARP14 PE=1 SV=3                                     | 202.7 | 6.8 | 18.6 | 1 | 0.7  | 20.05  | 371 |  |  |
| 372 | PAPP1_HUMAN | Pappalysin-1 OS=Homo sapiens<br>OX=9606 GN=PAPPA PE=1 SV=3                                                                       | 180.9 | 5.8 | 18.6 | 1 | 0.7  | 888.17 | 372 |  |  |
| 373 | MGAP_HUMAN  | MAX gene-associated protein<br>OS=Homo sapiens OX=9606 GN=MGA<br>PE=1 SV=4                                                       | 336.0 | 6.5 | 18.6 | 1 | 0.3  | 993.30 | 373 |  |  |
| 374 | DCD_HUMAN   | Dermcidin OS=Homo sapiens OX=9606<br>GN=DCD PE=1 SV=2                                                                            | 11.3  | 6.1 | 18.6 | 1 | 7.3  | 31.42  | 374 |  |  |

|     |             |                                                                                           |       |      |      |   |     |         |     |  |  |
|-----|-------------|-------------------------------------------------------------------------------------------|-------|------|------|---|-----|---------|-----|--|--|
| 375 | CQ082_HUMAN | Putative uncharacterized protein C17orf82 OS=Homo sapiens OX=9606 GN=C17orf82 PE=1 SV=2   | 25.4  | 10.4 | 18.6 | 1 | 3.6 | 8.86    | 375 |  |  |
| 376 | ULA1_HUMAN  | NEDD8-activating enzyme E1 regulatory subunit OS=Homo sapiens OX=9606 GN=NAE1 PE=1 SV=1   | 60.2  | 5.2  | 18.5 | 1 | 1.5 | 1048.04 | 376 |  |  |
| 377 | CYLC1_HUMAN | Cylicin-1 OS=Homo sapiens OX=9606 GN=CYLC1 PE=2 SV=2                                      | 74.2  | 9.7  | 18.5 | 1 | 1.1 | 1232.42 | 377 |  |  |
| 378 | HACE1_HUMAN | E3 ubiquitin-protein ligase HACE1 OS=Homo sapiens OX=9606 GN=HACE1 PE=1 SV=2              | 102.3 | 5.6  | 18.5 | 1 | 1.1 | 20.29   | 378 |  |  |
| 379 | ICE2_HUMAN  | Little elongation complex subunit 2 OS=Homo sapiens OX=9606 GN=ICE2 PE=1 SV=2             | 109.9 | 6.7  | 18.5 | 1 | 1.0 | 6.62    | 379 |  |  |
| 380 | FRPD3_HUMAN | FERM and PDZ domain-containing protein 3 OS=Homo sapiens OX=9606 GN=FRMPD3 PE=2 SV=2      | 199.1 | 8.4  | 18.4 | 1 | 0.6 | 21.50   | 380 |  |  |
| 381 | RUFY2_HUMAN | RUN and FYVE domain-containing protein 2 OS=Homo sapiens OX=9606 GN=RUFY2 PE=1 SV=3       | 70.0  | 5.6  | 18.4 | 1 | 1.7 | 42.74   | 381 |  |  |
| 382 | LIPS_HUMAN  | Hormone-sensitive lipase OS=Homo sapiens OX=9606 GN=LIPE PE=1 SV=4                        | 116.5 | 6.2  | 18.4 | 1 | 1.5 | 542.36  | 382 |  |  |
| 383 | KIF7_HUMAN  | Kinesin-like protein KIF7 OS=Homo sapiens OX=9606 GN=KIF7 PE=1 SV=2                       | 150.5 | 6.4  | 18.3 | 1 | 0.5 | 43.60   | 383 |  |  |
| 384 | SSX9_HUMAN  | Putative protein SSX9 OS=Homo sapiens OX=9606 GN=SSX9P PE=5 SV=1                          | 21.5  | 9.2  | 18.3 | 1 | 5.9 | 812.62  | 384 |  |  |
| 385 | GPTC4_HUMAN | G patch domain-containing protein 4 OS=Homo sapiens OX=9606 GN=GPATCH4 PE=1 SV=2          | 50.4  | 9.6  | 18.3 | 1 | 2.5 | 51.58   | 385 |  |  |
| 386 | TM198_HUMAN | Transmembrane protein 198 OS=Homo sapiens OX=9606 GN=TMEM198 PE=1 SV=1                    | 39.4  | 10.0 | 18.3 | 1 | 2.5 | 41.15   | 386 |  |  |
| 387 | ZNT6_HUMAN  | Zinc transporter 6 OS=Homo sapiens OX=9606 GN=SLC30A6 PE=1 SV=2                           | 51.1  | 9.3  | 18.2 | 1 | 2.4 | 793.50  | 387 |  |  |
| 388 | CBPQ_HUMAN  | Carboxypeptidase Q OS=Homo sapiens OX=9606 GN=CPQ PE=1 SV=1                               | 51.9  | 5.8  | 18.2 | 1 | 1.9 | 80.95   | 388 |  |  |
| 389 | ZN623_HUMAN | Zinc finger protein 623 OS=Homo sapiens OX=9606 GN=ZNF623 PE=1 SV=2                       | 61.4  | 8.5  | 18.2 | 1 | 2.6 | 5.10    | 389 |  |  |
| 390 | TF3C5_HUMAN | General transcription factor 3C polypeptide 5 OS=Homo sapiens OX=9606 GN=GTF3C5 PE=1 SV=2 | 59.5  | 6.5  | 18.2 | 1 | 2.7 | 35.70   | 390 |  |  |
| 391 | UCP3_HUMAN  | Mitochondrial uncoupling protein 3 OS=Homo sapiens OX=9606 GN=UCP3 PE=1 SV=1              | 34.2  | 9.3  | 18.2 | 1 | 2.6 | 1059.68 | 391 |  |  |



|     |              |                                                                                                               |       |     |      |   |      |        |     |  |  |
|-----|--------------|---------------------------------------------------------------------------------------------------------------|-------|-----|------|---|------|--------|-----|--|--|
| 392 | SPT13_HUMAN  | Spermatogenesis-associated protein 13<br>OS=Homo sapiens OX=9606<br>GN=SPATA13 PE=1 SV=1                      | 74.8  | 7.0 | 18.2 | 1 | 1.4  | 926.49 | 392 |  |  |
| 393 | LIPN_HUMAN   | Lipase member N OS=Homo sapiens<br>OX=9606 GN=LIPN PE=2 SV=2                                                  | 45.5  | 6.4 | 18.2 | 1 | 4.5  | 31.09  | 393 |  |  |
| 394 | OTU7A_HUMAN  | OTU domain-containing protein 7A<br>OS=Homo sapiens OX=9606<br>GN=OTUD7A PE=1 SV=1                            | 100.6 | 8.7 | 18.2 | 1 | 0.8  | 41.03  | 394 |  |  |
| 395 | ARH40_HUMAN  | Rho guanine nucleotide exchange<br>factor 40 OS=Homo sapiens OX=9606<br>GN=ARHGEF40 PE=1 SV=3                 | 164.6 | 5.8 | 18.2 | 1 | 0.5  | 30.47  | 395 |  |  |
| 396 | F161B_HUMAN  | Protein FAM161B OS=Homo sapiens<br>OX=9606 GN=FAM161B PE=1 SV=2                                               | 73.6  | 9.4 | 18.2 | 1 | 1.2  | 20.80  | 396 |  |  |
| 397 | ARHG8_HUMAN  | Neuroepithelial cell-transforming gene<br>1 protein OS=Homo sapiens OX=9606<br>GN=NET1 PE=1 SV=1              | 67.7  | 9.3 | 18.1 | 1 | 2.3  | 613.12 | 397 |  |  |
| 398 | CLD10_HUMAN  | Claudin-10 OS=Homo sapiens OX=9606<br>GN=CLDN10 PE=1 SV=2                                                     | 24.5  | 8.3 | 18.1 | 1 | 4.4  | 12.28  | 398 |  |  |
| 399 | RFC1_HUMAN   | Replication factor C subunit 1<br>OS=Homo sapiens OX=9606 GN=RFC1<br>PE=1 SV=4                                | 128.2 | 9.4 | 18.1 | 1 | 0.7  | 56.20  | 399 |  |  |
| 400 | RMC1_HUMAN   | Regulator of MON1-CCZ1 complex<br>OS=Homo sapiens OX=9606 GN=RMC1<br>PE=1 SV=2                                | 74.9  | 7.9 | 18.0 | 1 | 1.2  | 12.03  | 400 |  |  |
| 401 | ENOL_HUMAN   | Putative protein T-ENOL OS=Homo<br>sapiens OX=9606 GN=CDIPTOSP PE=4<br>SV=1                                   | 9.0   | 8.5 | 18.0 | 1 | 14.5 | 38.79  | 401 |  |  |
| 402 | CHSTB_HUMAN  | Carbohydrate sulfotransferase 11<br>OS=Homo sapiens OX=9606<br>GN=CHST11 PE=1 SV=1                            | 41.5  | 9.0 | 18.0 | 1 | 2.3  | 79.83  | 402 |  |  |
| 403 | TTF2_HUMAN   | Transcription termination factor 2<br>OS=Homo sapiens OX=9606 GN=TTF2<br>PE=1 SV=2                            | 129.5 | 8.6 | 18.0 | 1 | 0.8  | 41.78  | 403 |  |  |
| 404 | F184A_HUMAN  | Protein FAM184A OS=Homo sapiens<br>OX=9606 GN=FAM184A PE=2 SV=3                                               | 132.9 | 5.6 | 18.0 | 1 | 1.0  | 15.20  | 404 |  |  |
| 405 | BORCS8_HUMAN | BLOC-1-related complex subunit 8<br>OS=Homo sapiens OX=9606<br>GN=BORCS8 PE=1 SV=1                            | 13.4  | 5.5 | 18.0 | 1 | 9.2  | 798.70 | 405 |  |  |
| 406 | TR49D_HUMAN  | Tripartite motif-containing protein 49D<br>OS=Homo sapiens OX=9606<br>GN=TRIM49D1 PE=2 SV=1                   | 52.5  | 8.7 | 18.0 | 1 | 1.5  | 55.69  | 406 |  |  |
| 407 | UBE3C_HUMAN  | Ubiquitin-protein ligase E3C OS=Homo<br>sapiens OX=9606 GN=UBE3C PE=1<br>SV=3                                 | 123.8 | 6.3 | 18.0 | 1 | 1.3  | 630.64 | 407 |  |  |
| 408 | CK2N1_HUMAN  | Calcium/calmodulin-dependent protein<br>kinase II inhibitor 1 OS=Homo sapiens<br>OX=9606 GN=CAMK2N1 PE=1 SV=1 | 8.5   | 5.2 | 18.0 | 1 | 14.1 | 7.42   | 408 |  |  |

|     |             |                                                                                                                |       |      |      |   |     |         |     |  |  |  |
|-----|-------------|----------------------------------------------------------------------------------------------------------------|-------|------|------|---|-----|---------|-----|--|--|--|
| 409 | ES8L2_HUMAN | Epidermal growth factor receptor kinase substrate 8-like protein 2 OS=Homo sapiens OX=9606 GN=EPS8L2 PE=1 SV=2 | 80.6  | 6.4  | 18.0 | 1 | 1.4 | 17.75   | 409 |  |  |  |
| 410 | BRWD1_HUMAN | Bromodomain and WD repeat-containing protein 1 OS=Homo sapiens OX=9606 GN=BRWD1 PE=1 SV=4                      | 262.8 | 8.7  | 17.9 | 1 | 0.4 | 46.86   | 410 |  |  |  |
| 411 | STAT6_HUMAN | Signal transducer and activator of transcription 6 OS=Homo sapiens OX=9606 GN=STAT6 PE=1 SV=1                  | 94.1  | 5.8  | 17.9 | 1 | 0.9 | 1041.43 | 411 |  |  |  |
| 412 | ZN416_HUMAN | Zinc finger protein 416 OS=Homo sapiens OX=9606 GN=ZNF416 PE=2 SV=1                                            | 67.1  | 8.3  | 17.9 | 1 | 1.7 | 63.70   | 412 |  |  |  |
| 413 | PPR36_HUMAN | Protein phosphatase 1 regulatory subunit 36 OS=Homo sapiens OX=9606 GN=PPP1R36 PE=1 SV=1                       | 49.4  | 9.4  | 17.8 | 1 | 1.7 | 1007.03 | 413 |  |  |  |
| 414 | KS6A6_HUMAN | Ribosomal protein S6 kinase alpha-6 OS=Homo sapiens OX=9606 GN=RPS6KA6 PE=1 SV=1                               | 83.8  | 5.9  | 17.8 | 1 | 1.2 | 27.74   | 414 |  |  |  |
| 415 | RS6_HUMAN   | 40S ribosomal protein S6 OS=Homo sapiens OX=9606 GN=RPS6 PE=1 SV=1                                             | 28.7  | 10.9 | 17.8 | 1 | 5.2 | 693.21  | 415 |  |  |  |
| 416 | CP2CI_HUMAN | Cytochrome P450 2C18 OS=Homo sapiens OX=9606 GN=CYP2C18 PE=1 SV=3                                              | 55.7  | 6.8  | 17.8 | 1 | 1.8 | 1010.83 | 416 |  |  |  |
| 417 | ENY2_HUMAN  | Transcription and mRNA export factor ENY2 OS=Homo sapiens OX=9606 GN=ENY2 PE=1 SV=1                            | 11.5  | 9.4  | 17.8 | 1 | 7.9 | 965.79  | 417 |  |  |  |
| 418 | LAMA2_HUMAN | Laminin subunit alpha-2 OS=Homo sapiens OX=9606 GN=LAMA2 PE=1 SV=4                                             | 343.7 | 6.0  | 17.7 | 1 | 0.5 | 8.10    | 418 |  |  |  |
| 419 | MYOZ3_HUMAN | Myozenin-3 OS=Homo sapiens OX=9606 GN=MYOZ3 PE=1 SV=2                                                          | 27.1  | 9.4  | 17.7 | 1 | 5.6 | 16.38   | 419 |  |  |  |
| 420 | MON2_HUMAN  | Protein MON2 homolog OS=Homo sapiens OX=9606 GN=MON2 PE=1 SV=3                                                 | 190.2 | 5.7  | 17.7 | 1 | 0.6 | 691.36  | 420 |  |  |  |
| 421 | FZD2_HUMAN  | Frizzled-2 OS=Homo sapiens OX=9606 GN=FZD2 PE=1 SV=1                                                           | 63.5  | 8.5  | 17.7 | 1 | 1.9 | 752.32  | 421 |  |  |  |
| 422 | DC8L1_HUMAN | DDB1- and CUL4-associated factor 8-like protein 1 OS=Homo sapiens OX=9606 GN=DCAF8L1 PE=2 SV=1                 | 67.3  | 4.7  | 17.7 | 1 | 1.5 | 19.86   | 422 |  |  |  |
| 423 | RSF1_HUMAN  | Remodeling and spacing factor 1 OS=Homo sapiens OX=9606 GN=RSF1 PE=1 SV=2                                      | 163.7 | 4.9  | 17.7 | 1 | 0.7 | 788.29  | 423 |  |  |  |
| 424 | FLNC_HUMAN  | Filamin-C OS=Homo sapiens OX=9606 GN=FLNC PE=1 SV=3                                                            | 290.8 | 5.6  | 17.7 | 1 | 0.4 | 785.97  | 424 |  |  |  |
| 425 | SDCB2_HUMAN | Syntenin-2 OS=Homo sapiens OX=9606 GN=SDCBP2 PE=1 SV=2                                                         | 31.6  | 9.2  | 17.6 | 1 | 3.8 | 24.82   | 425 |  |  |  |

|     |             |                                                                                                 |       |      |      |   |     |         |     |      |   |      |
|-----|-------------|-------------------------------------------------------------------------------------------------|-------|------|------|---|-----|---------|-----|------|---|------|
| 426 | OTC_HUMAN   | Ornithine carbamoyltransferase, mitochondrial OS=Homo sapiens OX=9606 GN=OTC PE=1 SV=3          | 39.9  | 8.7  | 17.6 | 1 | 2.5 | 16.96   | 426 |      |   |      |
| 427 | COE2_HUMAN  | Transcription factor COE2 OS=Homo sapiens OX=9606 GN=EBF2 PE=2 SV=4                             | 62.6  | 9.2  | 17.6 | 1 | 3.0 | 24.99   | 427 |      |   |      |
| 428 | ARF5_HUMAN  | ADP-ribosylation factor 5 OS=Homo sapiens OX=9606 GN=ARF5 PE=1 SV=2                             | 20.5  | 6.3  | 17.6 | 1 | 8.3 | 46.75   | 428 |      |   |      |
| 429 | HHIP_HUMAN  | Hedgehog-interacting protein OS=Homo sapiens OX=9606 GN=HHIP PE=1 SV=3                          | 78.8  | 8.2  | 17.6 | 1 | 2.0 | 6.71    | 429 | 0.43 | 1 | 0.00 |
| 430 | EEA1_HUMAN  | Early endosome antigen 1 OS=Homo sapiens OX=9606 GN=EEA1 PE=1 SV=2                              | 162.4 | 5.5  | 17.6 | 1 | 0.6 | 935.06  | 430 |      |   |      |
| 431 | EIF3G_HUMAN | Eukaryotic translation initiation factor 3 subunit G OS=Homo sapiens OX=9606 GN=EIF3G PE=1 SV=2 | 35.6  | 5.9  | 17.6 | 1 | 2.5 | 11.94   | 431 |      |   |      |
| 432 | TXND2_HUMAN | Thioredoxin domain-containing protein 2 OS=Homo sapiens OX=9606 GN=TXND2 PE=2 SV=4              | 60.4  | 4.8  | 17.6 | 1 | 2.4 | 21.36   | 432 |      |   |      |
| 433 | PUS10_HUMAN | Putative tRNA pseudouridine synthase Pus10 OS=Homo sapiens OX=9606 GN=PUS10 PE=1 SV=1           | 60.2  | 6.1  | 17.6 | 1 | 2.6 | 575.73  | 433 |      |   |      |
| 434 | DDX6L_HUMAN | Probable ATP-dependent RNA helicase DDX60-like OS=Homo sapiens OX=9606 GN=DDX60L PE=2 SV=2      | 197.5 | 8.6  | 17.6 | 1 | 0.6 | 707.81  | 434 |      |   |      |
| 435 | ANR39_HUMAN | Ankyrin repeat domain-containing protein 39 OS=Homo sapiens OX=9606 GN=ANKRD39 PE=1 SV=1        | 19.6  | 6.4  | 17.5 | 1 | 7.1 | 8.63    | 435 |      |   |      |
| 436 | RL3_HUMAN   | 60S ribosomal protein L3 OS=Homo sapiens OX=9606 GN=RPL3 PE=1 SV=2                              | 46.1  | 10.2 | 17.5 | 1 | 2.7 | 840.43  | 436 |      |   |      |
| 437 | MYBPP_HUMAN | MYCBP-associated protein OS=Homo sapiens OX=9606 GN=MYCBPAP PE=1 SV=2                           | 108.1 | 7.1  | 17.5 | 1 | 1.1 | 908.12  | 437 |      |   |      |
| 438 | SPT22_HUMAN | Spermatogenesis-associated protein 22 OS=Homo sapiens OX=9606 GN=SPATA22 PE=1 SV=2              | 41.3  | 9.4  | 17.5 | 1 | 1.9 | 1294.82 | 438 |      |   |      |
| 439 | HXA10_HUMAN | Homeobox protein Hox-A10 OS=Homo sapiens OX=9606 GN=HOXA10 PE=1 SV=3                            | 42.4  | 8.6  | 17.5 | 1 | 2.2 | 79.55   | 439 |      |   |      |
| 440 | OSBL1_HUMAN | Oxysterol-binding protein-related protein 1 OS=Homo sapiens OX=9606 GN=OSBPL1A PE=1 SV=2        | 108.4 | 6.0  | 17.5 | 1 | 1.1 | 26.54   | 440 |      |   |      |
| 441 | FGF14_HUMAN | Fibroblast growth factor 14 OS=Homo sapiens OX=9606 GN=FGF14 PE=1 SV=1                          | 27.7  | 10.1 | 17.4 | 1 | 5.7 | 17.44   | 441 |      |   |      |
| 442 | PTPRE_HUMAN | Receptor-type tyrosine-protein phosphatase epsilon OS=Homo sapiens OX=9606 GN=PTPRE PE=1 SV=1   | 80.6  | 6.6  | 17.4 | 1 | 1.1 | 1163.34 | 442 |      |   |      |

|     |             |                                                                                                             |       |     |      |   |      |         |     |  |  |  |
|-----|-------------|-------------------------------------------------------------------------------------------------------------|-------|-----|------|---|------|---------|-----|--|--|--|
| 443 | AINX_HUMAN  | Alpha-internexin OS=Homo sapiens<br>OX=9606 GN=INA PE=1 SV=2                                                | 55.4  | 5.3 | 17.4 | 1 | 1.8  | 976.64  | 443 |  |  |  |
| 444 | NAT8_HUMAN  | N-acetyltransferase 8 OS=Homo sapiens<br>OX=9606 GN=NAT8 PE=1 SV=2                                          | 25.6  | 9.1 | 17.4 | 1 | 4.0  | 31.41   | 444 |  |  |  |
| 445 | NUDC3_HUMAN | NudC domain-containing protein 3<br>OS=Homo sapiens OX=9606<br>GN=NUDC3 PE=1 SV=3                           | 40.8  | 5.2 | 17.4 | 1 | 4.4  | 536.57  | 445 |  |  |  |
| 446 | GP1BA_HUMAN | Platelet glycoprotein Ib alpha chain<br>OS=Homo sapiens OX=9606 GN=GP1BA<br>PE=1 SV=2                       | 71.5  | 5.9 | 17.4 | 1 | 1.2  | 22.08   | 446 |  |  |  |
| 447 | ERVV2_HUMAN | Endogenous retrovirus group V<br>member 2 Env polyprotein OS=Homo sapiens<br>OX=9606 GN=ERVV-2 PE=2<br>SV=1 | 59.3  | 8.9 | 17.4 | 1 | 1.3  | 26.96   | 447 |  |  |  |
| 448 | C4BPA_HUMAN | C4b-binding protein alpha chain<br>OS=Homo sapiens OX=9606 GN=C4BPA<br>PE=1 SV=2                            | 67.0  | 7.2 | 17.4 | 1 | 2.3  | 43.35   | 448 |  |  |  |
| 449 | MEIOB_HUMAN | Meiosis-specific with OB domain-<br>containing protein OS=Homo sapiens<br>OX=9606 GN=MEIOB PE=2 SV=3        | 49.3  | 6.0 | 17.3 | 1 | 1.6  | 1275.64 | 449 |  |  |  |
| 450 | KAAG1_HUMAN | Kidney-associated antigen 1 OS=Homo sapiens<br>OX=9606 GN=KAAG1 PE=2<br>SV=1                                | 9.0   | 9.5 | 17.3 | 1 | 16.7 | 44.83   | 450 |  |  |  |
| 451 | S22A3_HUMAN | Solute carrier family 22 member 3<br>OS=Homo sapiens OX=9606<br>GN=SLC22A3 PE=1 SV=1                        | 61.2  | 8.9 | 17.3 | 1 | 1.4  | 45.48   | 451 |  |  |  |
| 452 | ZN730_HUMAN | Putative zinc finger protein 730<br>OS=Homo sapiens OX=9606<br>GN=ZNF730 PE=2 SV=1                          | 59.0  | 9.5 | 17.3 | 1 | 2.2  | 38.40   | 452 |  |  |  |
| 453 | SVIL_HUMAN  | Supervillin OS=Homo sapiens OX=9606<br>GN=SVIL PE=1 SV=2                                                    | 247.6 | 6.5 | 17.3 | 1 | 0.9  | 2.10    | 453 |  |  |  |
| 454 | KCNJ1_HUMAN | ATP-sensitive inward rectifier<br>potassium channel 1 OS=Homo sapiens<br>OX=9606 GN=KCNJ1 PE=1 SV=1         | 44.8  | 9.0 | 17.3 | 1 | 2.0  | 39.17   | 454 |  |  |  |
| 455 | M3K11_HUMAN | Mitogen-activated protein kinase<br>kinase kinase 11 OS=Homo sapiens<br>OX=9606 GN=MAP3K11 PE=1 SV=1        | 92.6  | 8.4 | 17.3 | 1 | 1.8  | 598.19  | 455 |  |  |  |
| 456 | OR3A3_HUMAN | Olfactory receptor 3A3 OS=Homo sapiens<br>OX=9606 GN=OR3A3 PE=2<br>SV=3                                     | 34.9  | 7.0 | 17.2 | 1 | 4.7  | 9.76    | 456 |  |  |  |
| 457 | CNBD2_HUMAN | Cyclic nucleotide-binding domain-<br>containing protein 2 OS=Homo sapiens<br>OX=9606 GN=CNBD2 PE=2 SV=2     | 67.5  | 9.3 | 17.2 | 1 | 2.4  | 594.00  | 457 |  |  |  |
| 458 | JADE2_HUMAN | E3 ubiquitin-protein ligase Jade-2<br>OS=Homo sapiens OX=9606 GN=JADE2<br>PE=1 SV=2                         | 87.4  | 5.1 | 17.2 | 1 | 1.3  | 67.88   | 458 |  |  |  |

|     |              |                                                                                                        |       |     |      |   |      |         |     |      |   |      |
|-----|--------------|--------------------------------------------------------------------------------------------------------|-------|-----|------|---|------|---------|-----|------|---|------|
| 459 | SKOR2_HUMAN  | SKI family transcriptional corepressor 2<br>OS=Homo sapiens OX=9606 GN=SKOR2<br>PE=1 SV=2              | 104.2 | 6.0 | 17.2 | 1 | 1.0  | 866.32  | 459 |      |   |      |
| 460 | MYL6_HUMAN   | Myosin light polypeptide 6 OS=Homo<br>sapiens OX=9606 GN=MYL6 PE=1 SV=2                                | 16.9  | 4.6 | 17.2 | 1 | 10.6 | 590.19  | 460 |      |   |      |
| 461 | TNFL8_HUMAN  | Tumor necrosis factor ligand<br>superfamily member 8 OS=Homo<br>sapiens OX=9606 GN=TNFSF8 PE=2<br>SV=1 | 26.0  | 7.6 | 17.2 | 1 | 6.0  | 677.63  | 461 |      |   |      |
| 462 | PALB2_HUMAN  | Partner and localizer of BRCA2<br>OS=Homo sapiens OX=9606 GN=PALB2<br>PE=1 SV=1                        | 131.2 | 6.0 | 17.2 | 1 | 0.8  | 1007.91 | 462 |      |   |      |
| 463 | HS74L_HUMAN  | Heat shock 70 kDa protein 4L<br>OS=Homo sapiens OX=9606<br>GN=HSPA4L PE=1 SV=3                         | 94.5  | 5.6 | 17.1 | 1 | 1.2  | 839.21  | 463 |      |   |      |
| 464 | HIPK2_HUMAN  | Homeodomain-interacting protein<br>kinase 2 OS=Homo sapiens OX=9606<br>GN=HIPK2 PE=1 SV=2              | 130.9 | 8.7 | 17.1 | 1 | 0.9  | 27.86   | 464 |      |   |      |
| 465 | R3GEF_HUMAN  | Guanine nucleotide exchange factor for<br>Rab-3A OS=Homo sapiens OX=9606<br>GN=RAB31L1 PE=1 SV=1       | 42.6  | 6.1 | 17.1 | 1 | 2.4  | 57.86   | 465 |      |   |      |
| 466 | RNF26_HUMAN  | E3 ubiquitin-protein ligase RNF26<br>OS=Homo sapiens OX=9606 GN=RNF26<br>PE=1 SV=1                     | 47.7  | 8.9 | 17.1 | 1 | 1.8  | 64.80   | 466 |      |   |      |
| 467 | ABCC8_HUMAN  | ATP-binding cassette sub-family C<br>member 8 OS=Homo sapiens OX=9606<br>GN=ABCC8 PE=1 SV=6            | 176.9 | 8.0 | 17.1 | 1 | 0.5  | 85.76   | 467 |      |   |      |
| 468 | TM50A_HUMAN  | Transmembrane protein 50A OS=Homo<br>sapiens OX=9606 GN=TMEM50A PE=1<br>SV=1                           | 17.4  | 5.6 | 17.1 | 1 | 6.4  | 50.46   | 468 |      |   |      |
| 469 | CCDC40_HUMAN | Coiled-coil domain-containing protein<br>40 OS=Homo sapiens OX=9606<br>GN=CCDC40 PE=2 SV=2             | 130.0 | 5.2 | 17.1 | 1 | 1.0  | 54.77   | 469 |      |   |      |
| 470 | IGSF3_HUMAN  | Immunoglobulin superfamily member 3<br>OS=Homo sapiens OX=9606 GN=IGSF3<br>PE=2 SV=3                   | 135.1 | 5.7 | 17.1 | 1 | 0.8  | 751.35  | 470 |      |   |      |
| 471 | CBPC1_HUMAN  | Cytosolic carboxypeptidase 1 OS=Homo<br>sapiens OX=9606 GN=AGTPBP1 PE=1<br>SV=3                        | 138.4 | 5.8 | 17.1 | 1 | 1.3  | 26.55   | 471 |      |   |      |
| 472 | SH3RF3_HUMAN | E3 ubiquitin-protein ligase SH3RF3<br>OS=Homo sapiens OX=9606<br>GN=SH3RF3 PE=1 SV=2                   | 92.7  | 9.1 | 17.0 | 1 | 1.0  | 10.22   | 472 | 3.17 | 1 | 0.00 |
| 473 | ZGRF1_HUMAN  | Protein ZGRF1 OS=Homo sapiens<br>OX=9606 GN=ZGRF1 PE=1 SV=3                                            | 236.5 | 5.8 | 17.0 | 1 | 0.4  | 54.14   | 473 |      |   |      |
| 474 | CDK18_HUMAN  | Cyclin-dependent kinase 18 OS=Homo<br>sapiens OX=9606 GN=CDK18 PE=1<br>SV=4                            | 54.4  | 8.8 | 17.0 | 1 | 1.7  | 77.96   | 474 |      |   |      |

|     |             |                                                                                                                |       |      |      |   |     |         |     |  |  |
|-----|-------------|----------------------------------------------------------------------------------------------------------------|-------|------|------|---|-----|---------|-----|--|--|
| 475 | SRSF1_HUMAN | Serine/arginine-rich splicing factor 1<br>OS=Homo sapiens OX=9606 GN=SRSF1<br>PE=1 SV=2                        | 27.7  | 10.4 | 17.0 | 1 | 3.6 | 831.90  | 475 |  |  |
| 476 | MYH4_HUMAN  | Myosin-4 OS=Homo sapiens OX=9606<br>GN=MYH4 PE=2 SV=2                                                          | 222.9 | 5.7  | 17.0 | 1 | 0.6 | 54.99   | 476 |  |  |
| 477 | PIIP2_HUMAN | Proline-serine-threonine phosphatase-<br>interacting protein 2 OS=Homo sapiens<br>OX=9606 GN=PSTPIP2 PE=1 SV=4 | 38.8  | 8.7  | 17.0 | 1 | 5.1 | 7.69    | 477 |  |  |
| 478 | NEC1_HUMAN  | Neuroendocrine convertase 1<br>OS=Homo sapiens OX=9606 GN=PCSK1<br>PE=1 SV=2                                   | 84.1  | 5.7  | 17.0 | 1 | 1.2 | 51.94   | 478 |  |  |
| 479 | DPOLN_HUMAN | DNA polymerase nu OS=Homo sapiens<br>OX=9606 GN=POLN PE=1 SV=2                                                 | 100.2 | 8.6  | 17.0 | 1 | 2.8 | 3.28    | 479 |  |  |
| 480 | CANT1_HUMAN | Soluble calcium-activated nucleotidase<br>1 OS=Homo sapiens OX=9606<br>GN=CANT1 PE=1 SV=1                      | 44.8  | 5.7  | 16.9 | 1 | 1.7 | 25.38   | 480 |  |  |
| 481 | ARGAL_HUMAN | Rho guanine nucleotide exchange<br>factor 10-like protein OS=Homo<br>sapiens OX=9606 GN=ARHGEF10L PE=1<br>SV=4 | 140.3 | 5.6  | 16.9 | 1 | 0.7 | 848.99  | 481 |  |  |
| 482 | UBQL1_HUMAN | Ubiquilin-1 OS=Homo sapiens OX=9606<br>GN=UBQLN1 PE=1 SV=2                                                     | 62.5  | 5.0  | 16.9 | 1 | 2.5 | 42.67   | 482 |  |  |
| 483 | PKHG5_HUMAN | Pleckstrin homology domain-containing<br>family G member 5 OS=Homo sapiens<br>OX=9606 GN=PLEKHG5 PE=1 SV=3     | 117.4 | 5.9  | 16.9 | 1 | 1.1 | 2.51    | 483 |  |  |
| 484 | T200B_HUMAN | Transmembrane protein 200B<br>OS=Homo sapiens OX=9606<br>GN=TMEM200B PE=2 SV=1                                 | 32.7  | 11.4 | 16.9 | 1 | 3.3 | 51.92   | 484 |  |  |
| 485 | COE4_HUMAN  | Transcription factor COE4 OS=Homo<br>sapiens OX=9606 GN=EBF4 PE=2 SV=2                                         | 64.4  | 8.9  | 16.9 | 1 | 1.3 | 1055.31 | 485 |  |  |
| 486 | DOC11_HUMAN | Dedicator of cytokinesis protein 11<br>OS=Homo sapiens OX=9606<br>GN=DOCK11 PE=1 SV=2                          | 237.5 | 7.9  | 16.9 | 1 | 0.4 | 29.99   | 486 |  |  |
| 487 | FA47E_HUMAN | Protein FAM47E OS=Homo sapiens<br>OX=9606 GN=FAM47E PE=2 SV=3                                                  | 45.6  | 9.5  | 16.9 | 1 | 2.0 | 1159.10 | 487 |  |  |
| 488 | PCDGH_HUMAN | Protocadherin gamma-B5 OS=Homo<br>sapiens OX=9606 GN=PCDHGB5 PE=2<br>SV=1                                      | 99.8  | 4.9  | 16.9 | 1 | 0.9 | 10.75   | 488 |  |  |
| 489 | LRN4L_HUMAN | LRRN4 C-terminal-like protein<br>OS=Homo sapiens OX=9606<br>GN=LRRN4CL PE=2 SV=1                               | 25.2  | 6.1  | 16.9 | 1 | 4.2 | 72.27   | 489 |  |  |
| 490 | F102A_HUMAN | Protein FAM102A OS=Homo sapiens<br>OX=9606 GN=FAM102A PE=1 SV=2                                                | 41.8  | 8.8  | 16.8 | 1 | 2.3 | 12.67   | 490 |  |  |
| 491 | OFUT2_HUMAN | GDP-fucose protein O-<br>fucosyltransferase 2 OS=Homo sapiens<br>OX=9606 GN=POFUT2 PE=1 SV=3                   | 49.9  | 6.1  | 16.8 | 1 | 2.8 | 26.85   | 491 |  |  |

|     |             |                                                                                                                                |       |     |      |   |      |         |     |  |  |
|-----|-------------|--------------------------------------------------------------------------------------------------------------------------------|-------|-----|------|---|------|---------|-----|--|--|
| 492 | SYNP2_HUMAN | Synaptopodin-2 OS=Homo sapiens<br>OX=9606 GN=SYNPO2 PE=1 SV=2                                                                  | 117.4 | 8.8 | 16.8 | 1 | 1.6  | 24.20   | 492 |  |  |
| 493 | PLXA1_HUMAN | Plexin-A1 OS=Homo sapiens OX=9606<br>GN=PLXNA1 PE=1 SV=3                                                                       | 210.9 | 6.5 | 16.8 | 1 | 0.8  | 40.71   | 493 |  |  |
| 494 | PRDX2_HUMAN | Peroxiredoxin-2 OS=Homo sapiens<br>OX=9606 GN=PRDX2 PE=1 SV=5                                                                  | 21.9  | 5.7 | 16.8 | 1 | 5.6  | 47.35   | 494 |  |  |
| 495 | TICN2_HUMAN | Testican-2 OS=Homo sapiens OX=9606<br>GN=SPOCK2 PE=1 SV=1                                                                      | 46.7  | 4.7 | 16.8 | 1 | 4.0  | 628.35  | 495 |  |  |
| 496 | CG026_HUMAN | Uncharacterized protein C7orf26<br>OS=Homo sapiens OX=9606<br>GN=C7orf26 PE=2 SV=1                                             | 50.0  | 7.6 | 16.8 | 1 | 2.4  | 804.82  | 496 |  |  |
| 497 | CEBOS_HUMAN | Protein CEBPZOS OS=Homo sapiens<br>OX=9606 GN=CEBPZOS PE=1 SV=2                                                                | 9.3   | 9.7 | 16.7 | 1 | 15.0 | 21.06   | 497 |  |  |
| 498 | MED16_HUMAN | Mediator of RNA polymerase II<br>transcription subunit 16 OS=Homo<br>sapiens OX=9606 GN=MED16 PE=1<br>SV=2                     | 96.7  | 7.1 | 16.7 | 1 | 1.4  | 29.92   | 498 |  |  |
| 499 | PYRD1_HUMAN | Pyridine nucleotide-disulfide<br>oxidoreductase domain-containing<br>protein 1 OS=Homo sapiens OX=9606<br>GN=PYROXD1 PE=1 SV=1 | 55.8  | 5.6 | 16.7 | 1 | 1.4  | 25.82   | 499 |  |  |
| 500 | SARG_HUMAN  | Specifically androgen-regulated gene<br>protein OS=Homo sapiens OX=9606<br>GN=SARG PE=1 SV=2                                   | 63.9  | 8.8 | 16.7 | 1 | 1.3  | 54.14   | 500 |  |  |
| 501 | CD36_HUMAN  | Platelet glycoprotein 4 OS=Homo<br>sapiens OX=9606 GN=CD36 PE=1 SV=2                                                           | 53.0  | 8.2 | 16.7 | 1 | 1.7  | 80.14   | 501 |  |  |
| 502 | GALE_HUMAN  | UDP-glucose 4-epimerase OS=Homo<br>sapiens OX=9606 GN=GALE PE=1 SV=2                                                           | 38.3  | 6.3 | 16.7 | 1 | 2.3  | 35.26   | 502 |  |  |
| 503 | MUS81_HUMAN | Crossover junction endonuclease<br>MUS81 OS=Homo sapiens OX=9606<br>GN=MUS81 PE=1 SV=3                                         | 61.1  | 9.8 | 16.7 | 1 | 1.5  | 5.10    | 503 |  |  |
| 504 | MMP16_HUMAN | Matrix metalloproteinase-16 OS=Homo<br>sapiens OX=9606 GN=MMP16 PE=1<br>SV=2                                                   | 69.5  | 8.7 | 16.6 | 1 | 1.5  | 48.01   | 504 |  |  |
| 505 | TGO1_HUMAN  | Transport and Golgi organization<br>protein 1 homolog OS=Homo sapiens<br>OX=9606 GN=MIA3 PE=1 SV=1                             | 213.6 | 4.8 | 16.6 | 1 | 0.4  | 1043.14 | 505 |  |  |
| 506 | CARD8_HUMAN | Caspase recruitment domain-<br>containing protein 8 OS=Homo sapiens<br>OX=9606 GN=CARD8 PE=1 SV=1                              | 48.9  | 5.1 | 16.6 | 1 | 2.1  | 31.02   | 506 |  |  |
| 507 | FHOD3_HUMAN | FH1/FH2 domain-containing protein 3<br>OS=Homo sapiens OX=9606<br>GN=FHOD3 PE=1 SV=2                                           | 158.5 | 5.7 | 16.6 | 1 | 0.8  | 44.68   | 507 |  |  |
| 508 | MRCKA_HUMAN | Serine/threonine-protein kinase MRCK<br>alpha OS=Homo sapiens OX=9606<br>GN=CDC42BPA PE=1 SV=1                                 | 197.2 | 6.2 | 16.6 | 1 | 0.6  | 3.21    | 508 |  |  |

|     |             |                                                                                                                 |       |     |      |   |     |        |     |  |  |
|-----|-------------|-----------------------------------------------------------------------------------------------------------------|-------|-----|------|---|-----|--------|-----|--|--|
| 509 | PARI_HUMAN  | PCNA-interacting partner OS=Homo sapiens OX=9606 GN=PARPBP PE=1 SV=3                                            | 65.0  | 9.0 | 16.6 | 1 | 1.9 | 52.48  | 509 |  |  |
| 510 | SNX13_HUMAN | Sorting nexin-13 OS=Homo sapiens OX=9606 GN=SNX13 PE=1 SV=4                                                     | 112.1 | 6.2 | 16.6 | 1 | 1.1 | 814.56 | 510 |  |  |
| 511 | LYSM2_HUMAN | LysM and putative peptidoglycan-binding domain-containing protein 2 OS=Homo sapiens OX=9606 GN=LYSMD2 PE=1 SV=1 | 23.4  | 5.3 | 16.5 | 1 | 7.4 | 571.18 | 511 |  |  |
| 512 | TTC29_HUMAN | Tetratricopeptide repeat protein 29 OS=Homo sapiens OX=9606 GN=TTC29 PE=2 SV=2                                  | 55.0  | 5.5 | 16.5 | 1 | 1.9 | 827.76 | 512 |  |  |
| 513 | MCM2_HUMAN  | DNA replication licensing factor MCM2 OS=Homo sapiens OX=9606 GN=MCM2 PE=1 SV=4                                 | 101.8 | 5.3 | 16.5 | 1 | 1.2 | 57.35  | 513 |  |  |
| 514 | IQEC3_HUMAN | IQ motif and SEC7 domain-containing protein 3 OS=Homo sapiens OX=9606 GN=IQSEC3 PE=2 SV=3                       | 127.5 | 6.1 | 16.5 | 1 | 1.0 | 57.17  | 514 |  |  |
| 515 | GMDS_HUMAN  | GDP-mannose 4,6 dehydratase OS=Homo sapiens OX=9606 GN=GMDS PE=1 SV=1                                           | 41.9  | 6.9 | 16.5 | 1 | 4.3 | 586.73 | 515 |  |  |
| 516 | K1C14_HUMAN | Keratin, type I cytoskeletal 14 OS=Homo sapiens OX=9606 GN=KRT14 PE=1 SV=4                                      | 51.5  | 5.1 | 16.5 | 1 | 2.3 | 768.61 | 516 |  |  |
| 517 | RETST_HUMAN | All-trans-retinol 13,14-reductase OS=Homo sapiens OX=9606 GN=RETSAT PE=1 SV=2                                   | 66.8  | 8.5 | 16.5 | 1 | 2.0 | 51.03  | 517 |  |  |
| 518 | K1C12_HUMAN | Keratin, type I cytoskeletal 12 OS=Homo sapiens OX=9606 GN=KRT12 PE=1 SV=1                                      | 53.5  | 4.7 | 16.4 | 1 | 2.0 | 70.81  | 518 |  |  |
| 519 | SCLT1_HUMAN | Sodium channel and clathrin linker 1 OS=Homo sapiens OX=9606 GN=SCLT1 PE=1 SV=2                                 | 80.9  | 5.8 | 16.4 | 1 | 1.2 | 43.47  | 519 |  |  |
| 520 | KS6C1_HUMAN | Ribosomal protein S6 kinase delta-1 OS=Homo sapiens OX=9606 GN=RPS6KC1 PE=1 SV=2                                | 118.6 | 4.8 | 16.4 | 1 | 0.8 | 45.22  | 520 |  |  |
| 521 | Z705D_HUMAN | Zinc finger protein 705D OS=Homo sapiens OX=9606 GN=ZNF705D PE=2 SV=1                                           | 34.7  | 9.1 | 16.4 | 1 | 6.0 | 462.90 | 521 |  |  |
| 522 | STRN4_HUMAN | Striatin-4 OS=Homo sapiens OX=9606 GN=STRN4 PE=1 SV=2                                                           | 80.5  | 5.2 | 16.4 | 1 | 1.9 | 19.58  | 522 |  |  |
| 523 | ARMC2_HUMAN | Armadillo repeat-containing protein 2 OS=Homo sapiens OX=9606 GN=ARMC2 PE=1 SV=4                                | 96.8  | 8.5 | 16.4 | 1 | 1.7 | 21.17  | 523 |  |  |
| 524 | WWTR1_HUMAN | WW domain-containing transcription regulator protein 1 OS=Homo sapiens OX=9606 GN=WWTR1 PE=1 SV=1               | 44.1  | 5.5 | 16.4 | 1 | 1.8 | 982.85 | 524 |  |  |



|     |             |                                                                                                         |       |     |      |   |     |         |     |  |  |
|-----|-------------|---------------------------------------------------------------------------------------------------------|-------|-----|------|---|-----|---------|-----|--|--|
| 525 | ABCB6_HUMAN | ATP-binding cassette sub-family B member 6, mitochondrial OS=Homo sapiens OX=9606 GN=ABCB6 PE=1 SV=1    | 93.8  | 8.7 | 16.4 | 1 | 0.8 | 61.35   | 525 |  |  |
| 526 | MSH2_HUMAN  | DNA mismatch repair protein Msh2 OS=Homo sapiens OX=9606 GN=MSH2 PE=1 SV=1                              | 104.7 | 5.6 | 16.4 | 1 | 1.5 | 648.97  | 526 |  |  |
| 527 | CDN1B_HUMAN | Cyclin-dependent kinase inhibitor 1B OS=Homo sapiens OX=9606 GN=CDKN1B PE=1 SV=1                        | 22.1  | 6.5 | 16.4 | 1 | 7.1 | 21.07   | 527 |  |  |
| 528 | HD_HUMAN    | Huntingtin OS=Homo sapiens OX=9606 GN=HTT PE=1 SV=2                                                     | 347.4 | 5.8 | 16.4 | 1 | 0.3 | 88.68   | 528 |  |  |
| 529 | MOB3C_HUMAN | MOB kinase activator 3C OS=Homo sapiens OX=9606 GN=MOB3C PE=1 SV=1                                      | 25.6  | 9.0 | 16.4 | 1 | 5.1 | 8.64    | 529 |  |  |
| 530 | CRFR2_HUMAN | Corticotropin-releasing factor receptor 2 OS=Homo sapiens OX=9606 GN=CRHR2 PE=1 SV=2                    | 47.7  | 7.9 | 16.4 | 1 | 1.7 | 1221.23 | 530 |  |  |
| 531 | ZNT1_HUMAN  | Zinc transporter 1 OS=Homo sapiens OX=9606 GN=SLC30A1 PE=1 SV=3                                         | 55.3  | 6.0 | 16.4 | 1 | 2.2 | 19.64   | 531 |  |  |
| 532 | CLIC6_HUMAN | Chloride intracellular channel protein 6 OS=Homo sapiens OX=9606 GN=CLIC6 PE=2 SV=3                     | 73.0  | 4.3 | 16.4 | 1 | 1.1 | 22.60   | 532 |  |  |
| 533 | RET3_HUMAN  | Retinol-binding protein 3 OS=Homo sapiens OX=9606 GN=RBP3 PE=1 SV=2                                     | 135.3 | 5.0 | 16.3 | 1 | 0.6 | 57.02   | 533 |  |  |
| 534 | ELOA1_HUMAN | Elongin-A OS=Homo sapiens OX=9606 GN=ELOA PE=1 SV=2                                                     | 89.9  | 9.6 | 16.3 | 1 | 1.3 | 857.78  | 534 |  |  |
| 535 | IFT1B_HUMAN | Interferon-induced protein with tetratricopeptide repeats 1B OS=Homo sapiens OX=9606 GN=IFT1B PE=1 SV=1 | 55.0  | 7.6 | 16.3 | 1 | 3.2 | 563.71  | 535 |  |  |
| 536 | XRN2_HUMAN  | 5'-3' exoribonuclease 2 OS=Homo sapiens OX=9606 GN=XRN2 PE=1 SV=1                                       | 108.5 | 7.3 | 16.3 | 1 | 0.8 | 53.67   | 536 |  |  |
| 537 | DYR_HUMAN   | Dihydrofolate reductase OS=Homo sapiens OX=9606 GN=DHFR PE=1 SV=2                                       | 21.4  | 6.8 | 16.3 | 1 | 5.3 | 933.56  | 537 |  |  |
| 538 | TUT4_HUMAN  | Terminal uridylyltransferase 4 OS=Homo sapiens OX=9606 GN=TUT4 PE=1 SV=3                                | 185.0 | 8.3 | 16.3 | 1 | 0.5 | 1027.84 | 538 |  |  |
| 539 | TR61B_HUMAN | tRNA (adenine(58)-N(1))-methyltransferase, mitochondrial OS=Homo sapiens OX=9606 GN=TRMT61B PE=1 SV=2   | 52.9  | 6.2 | 16.3 | 1 | 3.1 | 492.81  | 539 |  |  |
| 540 | INHBA_HUMAN | Inhibin beta A chain OS=Homo sapiens OX=9606 GN=INHBA PE=1 SV=2                                         | 47.4  | 8.3 | 16.3 | 1 | 3.3 | 606.74  | 540 |  |  |
| 541 | RGPS1_HUMAN | Ras-specific guanine nucleotide-releasing factor RalGPS1 OS=Homo sapiens OX=9606 GN=RALGPS1 PE=1 SV=1   | 62.1  | 9.2 | 16.2 | 1 | 2.2 | 7.23    | 541 |  |  |

|     |             |                                                                                              |       |     |      |   |     |         |     |  |  |
|-----|-------------|----------------------------------------------------------------------------------------------|-------|-----|------|---|-----|---------|-----|--|--|
| 542 | UH1BL_HUMAN | UHRF1-binding protein 1-like OS=Homo sapiens OX=9606 GN=UHRF1BP1L PE=1 SV=2                  | 164.1 | 5.9 | 16.2 | 1 | 0.8 | 23.16   | 542 |  |  |
| 543 | LMO7_HUMAN  | LIM domain only protein 7 OS=Homo sapiens OX=9606 GN=LMO7 PE=1 SV=3                          | 192.6 | 8.3 | 16.2 | 1 | 0.5 | 43.12   | 543 |  |  |
| 544 | ZMYM4_HUMAN | Zinc finger MYM-type protein 4 OS=Homo sapiens OX=9606 GN=ZMYM4 PE=1 SV=1                    | 172.7 | 6.5 | 16.2 | 1 | 0.8 | 20.28   | 544 |  |  |
| 545 | MGDP1_HUMAN | Magnesium-dependent phosphatase 1 OS=Homo sapiens OX=9606 GN=MDP1 PE=1 SV=1                  | 20.1  | 6.0 | 16.2 | 1 | 5.7 | 45.82   | 545 |  |  |
| 546 | MTCL1_HUMAN | Microtubule cross-linking factor 1 OS=Homo sapiens OX=9606 GN=MTCL1 PE=1 SV=5                | 209.4 | 6.0 | 16.2 | 1 | 0.5 | 882.44  | 546 |  |  |
| 547 | ASM3B_HUMAN | Acid sphingomyelinase-like phosphodiesterase 3b OS=Homo sapiens OX=9606 GN=SMPDL3B PE=1 SV=2 | 50.8  | 5.4 | 16.2 | 1 | 2.2 | 40.41   | 547 |  |  |
| 548 | VACHT_HUMAN | Vesicular acetylcholine transporter OS=Homo sapiens OX=9606 GN=SLC18A3 PE=1 SV=2             | 56.9  | 5.8 | 16.2 | 1 | 2.4 | 766.89  | 548 |  |  |
| 549 | E41L1_HUMAN | Band 4.1-like protein 1 OS=Homo sapiens OX=9606 GN=EPB41L1 PE=1 SV=2                         | 98.4  | 5.4 | 16.2 | 1 | 1.5 | 33.55   | 549 |  |  |
| 550 | CYTC_HUMAN  | Cystatin-C OS=Homo sapiens OX=9606 GN=CST3 PE=1 SV=1                                         | 15.8  | 9.0 | 16.2 | 1 | 7.5 | 47.78   | 550 |  |  |
| 551 | MRM3_HUMAN  | rRNA methyltransferase 3, mitochondrial OS=Homo sapiens OX=9606 GN=MRM3 PE=1 SV=2            | 47.0  | 8.9 | 16.2 | 1 | 2.6 | 25.06   | 551 |  |  |
| 552 | NHRF4_HUMAN | Na(+)/H(+) exchange regulatory cofactor NHE-RF4 OS=Homo sapiens OX=9606 GN=PDZD3 PE=1 SV=2   | 61.0  | 6.2 | 16.1 | 1 | 3.3 | 523.76  | 552 |  |  |
| 553 | NEB1_HUMAN  | Neurabin-1 OS=Homo sapiens OX=9606 GN=PPP1R9A PE=1 SV=2                                      | 123.3 | 5.0 | 16.1 | 1 | 0.9 | 13.09   | 553 |  |  |
| 554 | PLXA4_HUMAN | Plexin-A4 OS=Homo sapiens OX=9606 GN=PLXNA4 PE=1 SV=4                                        | 212.3 | 6.4 | 16.1 | 1 | 0.8 | 630.32  | 554 |  |  |
| 555 | DPYL4_HUMAN | Dihydropyrimidinase-related protein 4 OS=Homo sapiens OX=9606 GN=DPYSL4 PE=1 SV=2            | 61.8  | 6.6 | 16.1 | 1 | 1.9 | 917.05  | 555 |  |  |
| 556 | CQ047_HUMAN | Uncharacterized protein C17orf47 OS=Homo sapiens OX=9606 GN=C17orf47 PE=2 SV=3               | 63.1  | 9.3 | 16.1 | 1 | 1.6 | 979.00  | 556 |  |  |
| 557 | FA49B_HUMAN | Protein FAM49B OS=Homo sapiens OX=9606 GN=FAM49B PE=1 SV=1                                   | 36.7  | 5.8 | 16.1 | 1 | 2.2 | 1104.36 | 557 |  |  |
| 558 | TRIM9_HUMAN | E3 ubiquitin-protein ligase TRIM9 OS=Homo sapiens OX=9606 GN=TRIM9 PE=1 SV=1                 | 79.1  | 6.4 | 16.1 | 1 | 1.7 | 40.31   | 558 |  |  |

|     |             |                                                                                                  |       |      |      |   |      |         |     |  |  |
|-----|-------------|--------------------------------------------------------------------------------------------------|-------|------|------|---|------|---------|-----|--|--|
| 559 | CD1D_HUMAN  | Antigen-presenting glycoprotein CD1d<br>OS=Homo sapiens OX=9606 GN=CD1D<br>PE=1 SV=1             | 37.7  | 8.4  | 16.1 | 1 | 4.8  | 39.95   | 559 |  |  |
| 560 | GAB1_HUMAN  | GRB2-associated-binding protein 1<br>OS=Homo sapiens OX=9606 GN=GAB1<br>PE=1 SV=2                | 76.6  | 5.6  | 16.1 | 1 | 2.0  | 3.65    | 560 |  |  |
| 561 | ANR35_HUMAN | Ankyrin repeat domain-containing<br>protein 35 OS=Homo sapiens OX=9606<br>GN=ANKRD35 PE=2 SV=2   | 109.9 | 5.8  | 16.1 | 1 | 0.9  | 9.83    | 561 |  |  |
| 562 | PRKDC_HUMAN | DNA-dependent protein kinase<br>catalytic subunit OS=Homo sapiens<br>OX=9606 GN=PRKDC PE=1 SV=3  | 468.8 | 6.7  | 16.1 | 1 | 0.3  | 698.50  | 562 |  |  |
| 563 | DYH1_HUMAN  | Dynein heavy chain 1, axonemal<br>OS=Homo sapiens OX=9606<br>GN=DNAH1 PE=1 SV=5                  | 487.2 | 5.6  | 16.1 | 1 | 0.3  | 37.58   | 563 |  |  |
| 564 | NAR3_HUMAN  | Ecto-ADP-ribosyltransferase 3<br>OS=Homo sapiens OX=9606 GN=ART3<br>PE=1 SV=2                    | 43.9  | 5.7  | 16.0 | 1 | 3.6  | 14.42   | 564 |  |  |
| 565 | AP3M1_HUMAN | AP-3 complex subunit mu-1 OS=Homo<br>sapiens OX=9606 GN=AP3M1 PE=1<br>SV=1                       | 46.9  | 6.5  | 16.0 | 1 | 2.9  | 42.81   | 565 |  |  |
| 566 | NRDE2_HUMAN | Nuclear exosome regulator NRDE2<br>OS=Homo sapiens OX=9606 GN=NRDE2<br>PE=1 SV=3                 | 132.6 | 7.7  | 16.0 | 1 | 0.8  | 14.66   | 566 |  |  |
| 567 | HPPD_HUMAN  | 4-hydroxyphenylpyruvate dioxygenase<br>OS=Homo sapiens OX=9606 GN=HPD<br>PE=1 SV=2               | 44.9  | 6.5  | 16.0 | 1 | 2.5  | 966.51  | 567 |  |  |
| 568 | MKS1_HUMAN  | Meckel syndrome type 1 protein<br>OS=Homo sapiens OX=9606 GN=MKS1<br>PE=1 SV=2                   | 64.5  | 6.0  | 16.0 | 1 | 1.8  | 919.40  | 568 |  |  |
| 569 | NCBP3_HUMAN | Nuclear cap-binding protein subunit 3<br>OS=Homo sapiens OX=9606 GN=NCBP3<br>PE=1 SV=2           | 70.5  | 5.6  | 16.0 | 1 | 1.1  | 22.98   | 569 |  |  |
| 570 | ADM2_HUMAN  | Protein ADM2 OS=Homo sapiens<br>OX=9606 GN=ADM2 PE=1 SV=1                                        | 15.9  | 11.8 | 16.0 | 1 | 10.8 | 1.70    | 570 |  |  |
| 571 | GTPB1_HUMAN | GTP-binding protein 1 OS=Homo<br>sapiens OX=9606 GN=GTPBP1 PE=1<br>SV=3                          | 72.4  | 8.6  | 16.0 | 1 | 2.1  | 580.45  | 571 |  |  |
| 572 | FGD5_HUMAN  | FYVE, RhoGEF and PH domain-<br>containing protein 5 OS=Homo sapiens<br>OX=9606 GN=FGD5 PE=1 SV=3 | 159.8 | 4.9  | 16.0 | 1 | 0.5  | 1122.23 | 572 |  |  |
| 573 | PTBP2_HUMAN | Polypyrimidine tract-binding protein 2<br>OS=Homo sapiens OX=9606 GN=PTBP2<br>PE=1 SV=1          | 57.5  | 8.7  | 16.0 | 1 | 1.3  | 1097.05 | 573 |  |  |
| 574 | ABCG5_HUMAN | ATP-binding cassette sub-family G<br>member 5 OS=Homo sapiens OX=9606<br>GN=ABCG5 PE=1 SV=1      | 72.5  | 9.2  | 16.0 | 1 | 1.7  | 48.03   | 574 |  |  |

|     |             |                                                                                                               |       |     |      |   |     |         |     |  |  |
|-----|-------------|---------------------------------------------------------------------------------------------------------------|-------|-----|------|---|-----|---------|-----|--|--|
| 575 | ZHX2_HUMAN  | Zinc fingers and homeoboxes protein 2<br>OS=Homo sapiens OX=9606 GN=ZHX2<br>PE=1 SV=1                         | 92.2  | 6.4 | 16.0 | 1 | 0.8 | 54.53   | 575 |  |  |
| 576 | SO1B1_HUMAN | Solute carrier organic anion transporter<br>family member 1B1 OS=Homo sapiens<br>OX=9606 GN=SLCO1B1 PE=1 SV=2 | 76.4  | 8.9 | 16.0 | 1 | 1.2 | 30.70   | 576 |  |  |
| 577 | SMAG1_HUMAN | Protein Smaug homolog 1 OS=Homo<br>sapiens OX=9606 GN=SAMD4A PE=1<br>SV=3                                     | 79.4  | 8.6 | 16.0 | 1 | 1.3 | 942.16  | 577 |  |  |
| 578 | ICAL_HUMAN  | Calpastatin OS=Homo sapiens OX=9606<br>GN=CAST PE=1 SV=4                                                      | 76.5  | 5.0 | 15.9 | 1 | 1.1 | 12.30   | 578 |  |  |
| 579 | CBLB_HUMAN  | E3 ubiquitin-protein ligase CBL-B<br>OS=Homo sapiens OX=9606 GN=CBLB<br>PE=1 SV=2                             | 109.4 | 8.1 | 15.9 | 1 | 1.2 | 784.33  | 579 |  |  |
| 580 | CP2C8_HUMAN | Cytochrome P450 2C8 OS=Homo<br>sapiens OX=9606 GN=CYP2C8 PE=1<br>SV=2                                         | 55.8  | 8.8 | 15.9 | 1 | 2.0 | 52.77   | 580 |  |  |
| 581 | PLXC1_HUMAN | Plexin-C1 OS=Homo sapiens OX=9606<br>GN=PLXNC1 PE=1 SV=1                                                      | 175.6 | 7.8 | 15.9 | 1 | 0.5 | 930.14  | 581 |  |  |
| 582 | PKHN1_HUMAN | Pleckstrin homology domain-containing<br>family N member 1 OS=Homo sapiens<br>OX=9606 GN=PLEKHN1 PE=1 SV=3    | 66.4  | 9.1 | 15.9 | 1 | 1.6 | 919.83  | 582 |  |  |
| 583 | ARI5A_HUMAN | AT-rich interactive domain-containing<br>protein 5A OS=Homo sapiens OX=9606<br>GN=ARID5A PE=1 SV=2            | 64.0  | 9.3 | 15.9 | 1 | 1.7 | 47.99   | 583 |  |  |
| 584 | C1GLC_HUMAN | C1GALT1-specific chaperone 1<br>OS=Homo sapiens OX=9606<br>GN=C1GALT1C1 PE=1 SV=1                             | 36.4  | 6.4 | 15.9 | 1 | 2.2 | 1215.89 | 584 |  |  |
| 585 | RBMX2_HUMAN | RNA-binding motif protein, X-linked 2<br>OS=Homo sapiens OX=9606<br>GN=RBMX2 PE=1 SV=2                        | 37.3  | 9.8 | 15.8 | 1 | 3.1 | 1.27    | 585 |  |  |
| 586 | MCM8_HUMAN  | DNA helicase MCM8 OS=Homo sapiens<br>OX=9606 GN=MCM8 PE=1 SV=2                                                | 93.6  | 7.8 | 15.8 | 1 | 1.2 | 833.89  | 586 |  |  |
| 587 | IDD_HUMAN   | Integral membrane protein DGCR2/IDD<br>OS=Homo sapiens OX=9606 GN=DGCR2<br>PE=1 SV=1                          | 60.8  | 5.1 | 15.8 | 1 | 1.3 | 1092.04 | 587 |  |  |
| 588 | TLL8_HUMAN  | Protein monoglycylase TLL8 OS=Homo<br>sapiens OX=9606 GN=TLL8 PE=2 SV=4                                       | 94.6  | 8.5 | 15.8 | 1 | 1.6 | 20.24   | 588 |  |  |
| 589 | ZN473_HUMAN | Zinc finger protein 473 OS=Homo<br>sapiens OX=9606 GN=ZNF473 PE=1<br>SV=1                                     | 100.1 | 8.6 | 15.8 | 1 | 0.9 | 1122.34 | 589 |  |  |
| 590 | MAST3_HUMAN | Microtubule-associated<br>serine/threonine-protein kinase 3<br>OS=Homo sapiens OX=9606<br>GN=MAST3 PE=1 SV=2  | 143.0 | 8.2 | 15.8 | 1 | 0.9 | 690.95  | 590 |  |  |

|     |             |                                                                                                                      |       |     |      |   |      |        |     |  |  |
|-----|-------------|----------------------------------------------------------------------------------------------------------------------|-------|-----|------|---|------|--------|-----|--|--|
| 591 | CP2CJ_HUMAN | Cytochrome P450 2C19 OS=Homo sapiens OX=9606 GN=CYP2C19 PE=1 SV=3                                                    | 55.9  | 7.1 | 15.8 | 1 | 4.3  | 16.45  | 591 |  |  |
| 592 | PDILT_HUMAN | Protein disulfide-isomerase-like protein of the testis OS=Homo sapiens OX=9606 GN=PDILT PE=1 SV=2                    | 66.6  | 6.4 | 15.8 | 1 | 1.9  | 3.50   | 592 |  |  |
| 593 | COBA2_HUMAN | Collagen alpha-2(XI) chain OS=Homo sapiens OX=9606 GN=COL11A2 PE=1 SV=5                                              | 171.7 | 5.9 | 15.8 | 1 | 1.0  | 32.08  | 593 |  |  |
| 594 | COCA1_HUMAN | Collagen alpha-1(XII) chain OS=Homo sapiens OX=9606 GN=COL12A1 PE=1 SV=2                                             | 332.9 | 5.4 | 15.8 | 1 | 0.5  | 22.16  | 594 |  |  |
| 595 | FA11_HUMAN  | Coagulation factor XI OS=Homo sapiens OX=9606 GN=F11 PE=1 SV=1                                                       | 70.1  | 8.5 | 15.7 | 1 | 1.1  | 55.06  | 595 |  |  |
| 596 | ZN816_HUMAN | Zinc finger protein 816 OS=Homo sapiens OX=9606 GN=ZNF816 PE=2 SV=2                                                  | 75.7  | 9.4 | 15.7 | 1 | 1.2  | 78.40  | 596 |  |  |
| 597 | DYH10_HUMAN | Dynein heavy chain 10, axonemal OS=Homo sapiens OX=9606 GN=DNAH10 PE=1 SV=4                                          | 514.5 | 5.6 | 15.7 | 1 | 0.2  | 48.59  | 597 |  |  |
| 598 | MUC12_HUMAN | Mucin-12 OS=Homo sapiens OX=9606 GN=MUC12 PE=1 SV=2                                                                  | 557.8 | 5.3 | 15.7 | 1 | 0.2  | 21.65  | 598 |  |  |
| 599 | F86C2_HUMAN | Putative protein FAM86C2P OS=Homo sapiens OX=9606 GN=FAM86C2P PE=5 SV=1                                              | 18.5  | 8.2 | 15.7 | 1 | 11.5 | 508.33 | 599 |  |  |
| 600 | SIA4C_HUMAN | CMP-N-acetylneuraminat-beta-galactosamide-alpha-2,3-sialyltransferase 4 OS=Homo sapiens OX=9606 GN=ST3GAL4 PE=2 SV=1 | 38.0  | 9.4 | 15.7 | 1 | 3.0  | 786.59 | 600 |  |  |
| 601 | LAR4B_HUMAN | La-related protein 4B OS=Homo sapiens OX=9606 GN=LARP4B PE=1 SV=3                                                    | 80.5  | 6.5 | 15.7 | 1 | 1.9  | 646.99 | 601 |  |  |
| 602 | PZRN3_HUMAN | E3 ubiquitin-protein ligase PDZRN3 OS=Homo sapiens OX=9606 GN=PDZRN3 PE=1 SV=2                                       | 119.5 | 5.7 | 15.7 | 1 | 0.8  | 47.82  | 602 |  |  |
| 603 | REV1_HUMAN  | DNA repair protein REV1 OS=Homo sapiens OX=9606 GN=REV1 PE=1 SV=1                                                    | 138.2 | 8.8 | 15.7 | 1 | 0.8  | 41.91  | 603 |  |  |
| 604 | MAGD2_HUMAN | Melanoma-associated antigen D2 OS=Homo sapiens OX=9606 GN=MAGED2 PE=1 SV=2                                           | 64.9  | 9.3 | 15.7 | 1 | 1.8  | 38.13  | 604 |  |  |
| 605 | MYO5B_HUMAN | Unconventional myosin-Vb OS=Homo sapiens OX=9606 GN=MYO5B PE=1 SV=3                                                  | 213.5 | 6.8 | 15.7 | 1 | 0.5  | 883.83 | 605 |  |  |
| 606 | IDLC_HUMAN  | Axonemal dynein light intermediate polypeptide 1 OS=Homo sapiens OX=9606 GN=DNALI1 PE=1 SV=2                         | 29.6  | 8.7 | 15.7 | 1 | 6.6  | 639.33 | 606 |  |  |

|     |             |                                                                                                                     |       |      |      |   |     |         |     |      |   |      |
|-----|-------------|---------------------------------------------------------------------------------------------------------------------|-------|------|------|---|-----|---------|-----|------|---|------|
| 607 | CRBB2_HUMAN | Beta-crystallin B2 OS=Homo sapiens<br>OX=9606 GN=CRYBB2 PE=1 SV=2                                                   | 23.4  | 6.5  | 15.6 | 1 | 3.4 | 89.31   | 607 |      |   |      |
| 608 | GBB3_HUMAN  | Guanine nucleotide-binding protein<br>G(I)/G(S)/G(T) subunit beta-3<br>OS=Homo sapiens OX=9606 GN=GNB3<br>PE=1 SV=1 | 37.2  | 5.4  | 15.6 | 1 | 2.9 | 945.60  | 608 |      |   |      |
| 609 | FA98B_HUMAN | Protein FAM98B OS=Homo sapiens<br>OX=9606 GN=FAM98B PE=1 SV=2                                                       | 45.5  | 8.9  | 15.6 | 1 | 2.1 | 1017.90 | 609 |      |   |      |
| 610 | PIMRE_HUMAN | Protein PIMREG OS=Homo sapiens<br>OX=9606 GN=PIMREG PE=1 SV=1                                                       | 27.5  | 10.2 | 15.6 | 1 | 5.6 | 15.85   | 610 |      |   |      |
| 611 | PLEC_HUMAN  | Plectin OS=Homo sapiens OX=9606<br>GN=PLEC PE=1 SV=3                                                                | 531.5 | 5.7  | 15.6 | 1 | 0.2 | 1014.34 | 611 |      |   |      |
| 612 | ANR40_HUMAN | Ankyrin repeat domain-containing<br>protein 40 OS=Homo sapiens OX=9606<br>GN=ANKRD40 PE=1 SV=2                      | 41.1  | 4.9  | 15.6 | 1 | 2.7 | 14.08   | 612 |      |   |      |
| 613 | TENA_HUMAN  | Tenascin OS=Homo sapiens OX=9606<br>GN=TNC PE=1 SV=3                                                                | 240.7 | 4.8  | 15.6 | 1 | 0.4 | 49.85   | 613 |      |   |      |
| 614 | MYZAP_HUMAN | Myocardial zonula adherens protein<br>OS=Homo sapiens OX=9606<br>GN=MYZAP PE=1 SV=1                                 | 54.2  | 5.9  | 15.6 | 1 | 1.9 | 40.79   | 614 |      |   |      |
| 615 | ZN703_HUMAN | Zinc finger protein 703 OS=Homo<br>sapiens OX=9606 GN=ZNF703 PE=1<br>SV=1                                           | 58.2  | 9.0  | 15.6 | 1 | 2.0 | 40.88   | 615 |      |   |      |
| 616 | ARI4A_HUMAN | AT-rich interactive domain-containing<br>protein 4A OS=Homo sapiens OX=9606<br>GN=ARID4A PE=1 SV=3                  | 142.7 | 5.0  | 15.6 | 1 | 1.0 | 3.54    | 616 | 0.22 | 1 | 0.00 |
| 617 | CHD4_HUMAN  | Chromodomain-helicase-DNA-binding<br>protein 4 OS=Homo sapiens OX=9606<br>GN=CHD4 PE=1 SV=2                         | 217.9 | 5.6  | 15.6 | 1 | 0.5 | 17.50   | 617 |      |   |      |
| 618 | DGKK_HUMAN  | Diacylglycerol kinase kappa OS=Homo<br>sapiens OX=9606 GN=DGKK PE=1 SV=1                                            | 141.7 | 5.4  | 15.5 | 1 | 0.6 | 11.57   | 618 |      |   |      |
| 619 | CHERP_HUMAN | Calcium homeostasis endoplasmic<br>reticulum protein OS=Homo sapiens<br>OX=9606 GN=CHERP PE=1 SV=3                  | 103.6 | 9.1  | 15.5 | 1 | 1.7 | 36.24   | 619 |      |   |      |
| 620 | SFI1_HUMAN  | Protein SFI1 homolog OS=Homo<br>sapiens OX=9606 GN=SFI1 PE=1 SV=2                                                   | 147.6 | 10.8 | 15.5 | 1 | 0.9 | 5.38    | 620 |      |   |      |
| 621 | MET25_HUMAN | Methyltransferase-like protein 25<br>OS=Homo sapiens OX=9606<br>GN=METT25 PE=2 SV=2                                 | 68.2  | 6.7  | 15.5 | 1 | 1.2 | 30.78   | 621 |      |   |      |
| 622 | OAT_HUMAN   | Ornithine aminotransferase,<br>mitochondrial OS=Homo sapiens<br>OX=9606 GN=OAT PE=1 SV=1                            | 48.5  | 6.6  | 15.5 | 1 | 2.3 | 917.11  | 622 |      |   |      |
| 623 | IWS1_HUMAN  | Protein IWS1 homolog OS=Homo<br>sapiens OX=9606 GN=IWS1 PE=1 SV=2                                                   | 91.9  | 4.6  | 15.5 | 1 | 1.1 | 893.22  | 623 |      |   |      |
| 624 | CHK2_HUMAN  | Serine/threonine-protein kinase Chk2<br>OS=Homo sapiens OX=9606 GN=CHK2<br>PE=1 SV=1                                | 60.9  | 5.7  | 15.5 | 1 | 1.7 | 18.74   | 624 |      |   |      |

|     |             |                                                                                                          |       |      |      |   |      |        |     |  |  |
|-----|-------------|----------------------------------------------------------------------------------------------------------|-------|------|------|---|------|--------|-----|--|--|
| 625 | GRPE1_HUMAN | GrpE protein homolog 1, mitochondrial OS=Homo sapiens OX=9606 GN=GRPEL1 PE=1 SV=2                        | 24.3  | 8.2  | 15.5 | 1 | 4.1  | 928.84 | 625 |  |  |
| 626 | PDE7A_HUMAN | High affinity cAMP-specific 3',5'-cyclic phosphodiesterase 7A OS=Homo sapiens OX=9606 GN=PDE7A PE=1 SV=2 | 55.5  | 7.1  | 15.5 | 1 | 3.3  | 536.41 | 626 |  |  |
| 627 | KVD12_HUMAN | Immunoglobulin kappa variable 1D-12 OS=Homo sapiens OX=9606 GN=IGKV1D-12 PE=1 SV=2                       | 12.6  | 7.7  | 15.5 | 1 | 13.7 | 44.50  | 627 |  |  |
| 628 | AL9A1_HUMAN | 4-trimethylaminobutyraldehyde dehydrogenase OS=Homo sapiens OX=9606 GN=ALDH9A1 PE=1 SV=3                 | 53.8  | 5.7  | 15.5 | 1 | 2.4  | 13.98  | 628 |  |  |
| 629 | NAL13_HUMAN | NACHT, LRR and PYD domains-containing protein 13 OS=Homo sapiens OX=9606 GN=NLRP13 PE=2 SV=2             | 118.8 | 5.4  | 15.5 | 1 | 0.9  | 831.86 | 629 |  |  |
| 630 | SC5A9_HUMAN | Sodium/glucose cotransporter 4 OS=Homo sapiens OX=9606 GN=SLC5A9 PE=1 SV=2                               | 74.0  | 6.7  | 15.4 | 1 | 2.5  | 597.73 | 630 |  |  |
| 631 | NHLC2_HUMAN | NHL repeat-containing protein 2 OS=Homo sapiens OX=9606 GN=NHLRC2 PE=1 SV=1                              | 79.4  | 5.3  | 15.4 | 1 | 1.9  | 564.11 | 631 |  |  |
| 632 | HIP1R_HUMAN | Huntingtin-interacting protein 1-related protein OS=Homo sapiens OX=9606 GN=HIP1R PE=1 SV=2              | 119.3 | 6.2  | 15.4 | 1 | 0.8  | 52.87  | 632 |  |  |
| 633 | RHDF1_HUMAN | Inactive rhomboid protein 1 OS=Homo sapiens OX=9606 GN=RHBDF1 PE=1 SV=2                                  | 97.3  | 8.8  | 15.4 | 1 | 1.1  | 42.18  | 633 |  |  |
| 634 | FA8_HUMAN   | Coagulation factor VIII OS=Homo sapiens OX=9606 GN=F8 PE=1 SV=1                                          | 266.8 | 6.9  | 15.4 | 1 | 0.5  | 29.20  | 634 |  |  |
| 635 | MPRI_HUMAN  | Cation-independent mannose-6-phosphate receptor OS=Homo sapiens OX=9606 GN=IGF2R PE=1 SV=3               | 274.2 | 5.6  | 15.4 | 1 | 0.3  | 61.49  | 635 |  |  |
| 636 | NAT14_HUMAN | N-acetyltransferase 14 OS=Homo sapiens OX=9606 GN=NAT14 PE=1 SV=1                                        | 21.6  | 10.7 | 15.4 | 1 | 5.8  | 2.12   | 636 |  |  |
| 637 | EMAL5_HUMAN | Echinoderm microtubule-associated protein-like 5 OS=Homo sapiens OX=9606 GN=EML5 PE=2 SV=3               | 219.3 | 7.9  | 15.4 | 1 | 0.5  | 982.18 | 637 |  |  |
| 638 | IF3M_HUMAN  | Translation initiation factor IF-3, mitochondrial OS=Homo sapiens OX=9606 GN=MTIF3 PE=1 SV=4             | 31.7  | 9.7  | 15.4 | 1 | 3.2  | 65.13  | 638 |  |  |
| 639 | FBX33_HUMAN | F-box only protein 33 OS=Homo sapiens OX=9606 GN=FBXO33 PE=1 SV=1                                        | 62.6  | 7.0  | 15.4 | 1 | 2.5  | 22.08  | 639 |  |  |

|     |             |                                                                                                                |       |      |      |   |      |         |     |  |  |  |
|-----|-------------|----------------------------------------------------------------------------------------------------------------|-------|------|------|---|------|---------|-----|--|--|--|
| 640 | NIP7_HUMAN  | 60S ribosome subunit biogenesis protein NIP7 homolog OS=Homo sapiens OX=9606 GN=NIP7 PE=1 SV=1                 | 20.4  | 8.7  | 15.4 | 1 | 4.4  | 1020.58 | 640 |  |  |  |
| 641 | CDC5L_HUMAN | Cell division cycle 5-like protein OS=Homo sapiens OX=9606 GN=CDC5L PE=1 SV=2                                  | 92.2  | 8.2  | 15.4 | 1 | 1.1  | 42.96   | 641 |  |  |  |
| 642 | PDPR_HUMAN  | Pyruvate dehydrogenase phosphatase regulatory subunit, mitochondrial OS=Homo sapiens OX=9606 GN=PDPR PE=1 SV=2 | 99.3  | 5.9  | 15.4 | 1 | 1.4  | 33.71   | 642 |  |  |  |
| 643 | TSAP1_HUMAN | tRNA selenocysteine 1-associated protein 1 OS=Homo sapiens OX=9606 GN=TRNAU1AP PE=1 SV=1                       | 32.5  | 4.6  | 15.4 | 1 | 4.5  | 35.65   | 643 |  |  |  |
| 644 | TNS2_HUMAN  | Tensin-2 OS=Homo sapiens OX=9606 GN=TNS2 PE=1 SV=2                                                             | 152.5 | 8.7  | 15.4 | 1 | 0.5  | 1244.99 | 644 |  |  |  |
| 645 | RREB1_HUMAN | Ras-responsive element-binding protein 1 OS=Homo sapiens OX=9606 GN=RREB1 PE=1 SV=3                            | 181.3 | 6.5  | 15.4 | 1 | 0.7  | 840.34  | 645 |  |  |  |
| 646 | KAD9_HUMAN  | Adenylate kinase 9 OS=Homo sapiens OX=9606 GN=AK9 PE=1 SV=2                                                    | 221.3 | 5.0  | 15.4 | 1 | 0.4  | 69.34   | 646 |  |  |  |
| 647 | PKHD1_HUMAN | Fibrocystin OS=Homo sapiens OX=9606 GN=PKHD1 PE=1 SV=1                                                         | 446.4 | 6.1  | 15.4 | 1 | 0.3  | 746.36  | 647 |  |  |  |
| 648 | RM52_HUMAN  | 39S ribosomal protein L52, mitochondrial OS=Homo sapiens OX=9606 GN=MRPL52 PE=1 SV=2                           | 13.7  | 10.3 | 15.3 | 1 | 7.3  | 883.71  | 648 |  |  |  |
| 649 | ZN100_HUMAN | Zinc finger protein 100 OS=Homo sapiens OX=9606 GN=ZNF100 PE=2 SV=2                                            | 62.7  | 9.2  | 15.3 | 1 | 3.1  | 589.26  | 649 |  |  |  |
| 650 | IL36G_HUMAN | Interleukin-36 gamma OS=Homo sapiens OX=9606 GN=IL36G PE=1 SV=1                                                | 18.7  | 5.0  | 15.3 | 1 | 5.3  | 21.81   | 650 |  |  |  |
| 651 | CN37_HUMAN  | 2',3'-cyclic-nucleotide 3'-phosphodiesterase OS=Homo sapiens OX=9606 GN=CNP PE=1 SV=2                          | 47.5  | 9.2  | 15.3 | 1 | 3.3  | 584.60  | 651 |  |  |  |
| 652 | CSCL1_HUMAN | CSC1-like protein 1 OS=Homo sapiens OX=9606 GN=TMEM63A PE=1 SV=3                                               | 92.1  | 7.0  | 15.3 | 1 | 2.2  | 437.16  | 652 |  |  |  |
| 653 | RAB17_HUMAN | Ras-related protein Rab-17 OS=Homo sapiens OX=9606 GN=RAB17 PE=1 SV=2                                          | 23.5  | 7.7  | 15.3 | 1 | 4.7  | 47.57   | 653 |  |  |  |
| 654 | CHPF2_HUMAN | Chondroitin sulfate glucuronyltransferase OS=Homo sapiens OX=9606 GN=CHPF2 PE=2 SV=2                           | 85.9  | 7.9  | 15.3 | 1 | 1.3  | 949.80  | 654 |  |  |  |
| 655 | PATL1_HUMAN | Protein PAT1 homolog 1 OS=Homo sapiens OX=9606 GN=PATL1 PE=1 SV=2                                              | 86.8  | 6.2  | 15.3 | 1 | 1.4  | 25.19   | 655 |  |  |  |
| 656 | LV151_HUMAN | Immunoglobulin lambda variable 1-51 OS=Homo sapiens OX=9606 GN=IGLV1-51 PE=1 SV=2                              | 12.2  | 6.5  | 15.3 | 1 | 13.7 | 41.76   | 656 |  |  |  |



|     |              |                                                                                                          |       |     |      |   |     |         |     |  |  |
|-----|--------------|----------------------------------------------------------------------------------------------------------|-------|-----|------|---|-----|---------|-----|--|--|
| 657 | F1711_HUMAN  | Protein FAM171A1 OS=Homo sapiens<br>OX=9606 GN=FAM171A1 PE=1 SV=1                                        | 97.8  | 6.1 | 15.3 | 1 | 1.0 | 22.90   | 657 |  |  |
| 658 | PRCC_HUMAN   | Proline-rich protein PRCC OS=Homo sapiens<br>OX=9606 GN=PRCC PE=1 SV=1                                   | 52.4  | 5.0 | 15.3 | 1 | 4.1 | 449.39  | 658 |  |  |
| 659 | RAD9B_HUMAN  | Cell cycle checkpoint control protein<br>RAD9B OS=Homo sapiens OX=9606<br>GN=RAD9B PE=1 SV=2             | 47.8  | 6.5 | 15.2 | 1 | 3.1 | 630.28  | 659 |  |  |
| 660 | SAXO1_HUMAN  | Stabilizer of axonemal microtubules 1<br>OS=Homo sapiens OX=9606 GN=SAXO1<br>PE=1 SV=2                   | 54.6  | 8.7 | 15.2 | 1 | 2.7 | 46.64   | 660 |  |  |
| 661 | YDJC_HUMAN   | Carbohydrate deacetylase OS=Homo sapiens<br>OX=9606 GN=YDJC PE=1 SV=1                                    | 34.4  | 6.0 | 15.2 | 1 | 4.0 | 12.96   | 661 |  |  |
| 662 | T3HPD_HUMAN  | Trans-3-hydroxy-L-proline dehydratase<br>OS=Homo sapiens OX=9606<br>GN=L3HYPDH PE=1 SV=2                 | 38.1  | 6.2 | 15.2 | 1 | 2.3 | 1.97    | 662 |  |  |
| 663 | DIAP1_HUMAN  | Protein diaphanous homolog 1<br>OS=Homo sapiens OX=9606<br>GN=DIAPH1 PE=1 SV=2                           | 141.3 | 5.3 | 15.2 | 1 | 0.6 | 1068.41 | 663 |  |  |
| 664 | UCKL1_HUMAN  | Uridine-cytidine kinase-like 1 OS=Homo sapiens<br>OX=9606 GN=UCKL1 PE=1 SV=2                             | 61.1  | 6.9 | 15.2 | 1 | 1.5 | 90.47   | 664 |  |  |
| 665 | MRP6_HUMAN   | Multidrug resistance-associated protein 6<br>OS=Homo sapiens OX=9606<br>GN=ABCC6 PE=1 SV=2               | 164.8 | 8.8 | 15.2 | 1 | 0.7 | 791.11  | 665 |  |  |
| 666 | LEG2_HUMAN   | Galectin-2 OS=Homo sapiens OX=9606<br>GN=LGALS2 PE=1 SV=3                                                | 14.6  | 5.9 | 15.2 | 1 | 8.3 | 764.38  | 666 |  |  |
| 667 | SI1L2_HUMAN  | Signal-induced proliferation-associated 1-like protein 2<br>OS=Homo sapiens OX=9606 GN=SIPA1L2 PE=1 SV=2 | 190.3 | 6.3 | 15.2 | 1 | 1.0 | 474.09  | 667 |  |  |
| 668 | B3GT2_HUMAN  | Beta-1,3-galactosyltransferase 2<br>OS=Homo sapiens OX=9606<br>GN=B3GALT2 PE=1 SV=1                      | 49.2  | 9.5 | 15.2 | 1 | 2.8 | 607.33  | 668 |  |  |
| 669 | FBH1_HUMAN   | F-box DNA helicase 1 OS=Homo sapiens<br>OX=9606 GN=FBH1 PE=1 SV=2                                        | 117.6 | 8.6 | 15.2 | 1 | 0.8 | 1102.33 | 669 |  |  |
| 670 | ROCK2_HUMAN  | Rho-associated protein kinase 2<br>OS=Homo sapiens OX=9606 GN=ROCK2<br>PE=1 SV=4                         | 160.8 | 5.8 | 15.2 | 1 | 0.7 | 68.90   | 670 |  |  |
| 671 | MEGF6_HUMAN  | Multiple epidermal growth factor-like domains protein 6<br>OS=Homo sapiens OX=9606 GN=MEGF6 PE=1 SV=4    | 161.1 | 5.9 | 15.2 | 1 | 0.9 | 2.29    | 671 |  |  |
| 672 | ZNF608_HUMAN | Zinc finger protein 608 OS=Homo sapiens<br>OX=9606 GN=ZNF608 PE=1 SV=4                                   | 162.1 | 8.9 | 15.2 | 1 | 1.0 | 17.35   | 672 |  |  |
| 673 | ZDH15_HUMAN  | Palmitoyltransferase ZDHHC15<br>OS=Homo sapiens OX=9606<br>GN=ZDHHC15 PE=1 SV=1                          | 39.3  | 8.4 | 15.2 | 1 | 3.3 | 804.18  | 673 |  |  |

|     |             |                                                                                                            |       |      |      |   |     |         |     |  |  |
|-----|-------------|------------------------------------------------------------------------------------------------------------|-------|------|------|---|-----|---------|-----|--|--|
| 674 | NR2E3_HUMAN | Photoreceptor-specific nuclear receptor OS=Homo sapiens OX=9606 GN=NR2E3 PE=1 SV=1                         | 44.7  | 8.2  | 15.2 | 1 | 2.2 | 977.89  | 674 |  |  |
| 675 | LRC34_HUMAN | Leucine-rich repeat-containing protein 34 OS=Homo sapiens OX=9606 GN=LRR34 PE=2 SV=3                       | 51.2  | 6.3  | 15.2 | 1 | 2.6 | 717.57  | 675 |  |  |
| 676 | HUNK_HUMAN  | Hormonally up-regulated neu tumor-associated kinase OS=Homo sapiens OX=9606 GN=HUNK PE=1 SV=1              | 79.6  | 9.2  | 15.2 | 1 | 1.3 | 877.61  | 676 |  |  |
| 677 | ZN806_HUMAN | Zinc finger protein 806 OS=Homo sapiens OX=9606 GN=ZNF806 PE=3 SV=1                                        | 67.8  | 8.8  | 15.2 | 1 | 1.5 | 55.64   | 677 |  |  |
| 678 | EXOC1_HUMAN | Exocyst complex component 1 OS=Homo sapiens OX=9606 GN=EXOC1 PE=1 SV=4                                     | 101.9 | 6.2  | 15.2 | 1 | 1.2 | 727.65  | 678 |  |  |
| 679 | SYVM_HUMAN  | Valine--tRNA ligase, mitochondrial OS=Homo sapiens OX=9606 GN=VAR52 PE=1 SV=2                              | 118.4 | 6.6  | 15.2 | 1 | 1.6 | 614.02  | 679 |  |  |
| 680 | MND1_HUMAN  | Meiotic nuclear division protein 1 homolog OS=Homo sapiens OX=9606 GN=MND1 PE=1 SV=1                       | 23.7  | 8.3  | 15.2 | 1 | 3.9 | 1055.14 | 680 |  |  |
| 681 | LYPA2_HUMAN | Acyl-protein thioesterase 2 OS=Homo sapiens OX=9606 GN=LYPLA2 PE=1 SV=1                                    | 24.7  | 6.7  | 15.2 | 1 | 3.5 | 41.23   | 681 |  |  |
| 682 | CLUS_HUMAN  | Clusterin OS=Homo sapiens OX=9606 GN=CLU PE=1 SV=1                                                         | 52.5  | 5.9  | 15.2 | 1 | 2.4 | 39.84   | 682 |  |  |
| 683 | TOP1M_HUMAN | DNA topoisomerase I, mitochondrial OS=Homo sapiens OX=9606 GN=TOP1MT PE=1 SV=1                             | 69.8  | 9.5  | 15.2 | 1 | 2.3 | 22.65   | 683 |  |  |
| 684 | MOBP_HUMAN  | Myelin-associated oligodendrocyte basic protein OS=Homo sapiens OX=9606 GN=MOBP PE=1 SV=2                  | 20.9  | 11.3 | 15.1 | 1 | 6.0 | 959.59  | 684 |  |  |
| 685 | PAAT_HUMAN  | ATPase PAAT OS=Homo sapiens OX=9606 GN=PAAT PE=1 SV=2                                                      | 49.2  | 5.9  | 15.1 | 1 | 3.6 | 9.38    | 685 |  |  |
| 686 | ASXL1_HUMAN | Polycomb group protein ASXL1 OS=Homo sapiens OX=9606 GN=ASXL1 PE=1 SV=4                                    | 165.3 | 5.8  | 15.1 | 1 | 0.5 | 13.23   | 686 |  |  |
| 687 | CSN7A_HUMAN | COP9 signalosome complex subunit 7a OS=Homo sapiens OX=9606 GN=COPS7A PE=1 SV=1                            | 30.3  | 8.3  | 15.1 | 1 | 8.0 | 27.49   | 687 |  |  |
| 688 | AT7L2_HUMAN | Ataxin-7-like protein 2 OS=Homo sapiens OX=9606 GN=ATXN7L2 PE=1 SV=1                                       | 77.1  | 9.4  | 15.1 | 1 | 2.5 | 515.49  | 688 |  |  |
| 689 | ARVC_HUMAN  | Armadillo repeat protein deleted in velo-cardio-facial syndrome OS=Homo sapiens OX=9606 GN=ARVCF PE=1 SV=1 | 104.6 | 6.4  | 15.1 | 1 | 0.9 | 15.17   | 689 |  |  |

|     |             |                                                                                                               |       |     |      |   |      |         |     |  |  |
|-----|-------------|---------------------------------------------------------------------------------------------------------------|-------|-----|------|---|------|---------|-----|--|--|
| 690 | SAMD7_HUMAN | Sterile alpha motif domain-containing protein 7 OS=Homo sapiens OX=9606 GN=SAMD7 PE=1 SV=1                    | 49.1  | 6.3 | 15.1 | 1 | 2.7  | 9.15    | 690 |  |  |
| 691 | FAD1_HUMAN  | FAD synthase OS=Homo sapiens OX=9606 GN=FLAD1 PE=1 SV=1                                                       | 65.2  | 6.5 | 15.1 | 1 | 1.5  | 11.62   | 691 |  |  |
| 692 | NEBL_HUMAN  | Nebulette OS=Homo sapiens OX=9606 GN=NEBL PE=1 SV=1                                                           | 116.4 | 7.9 | 15.1 | 1 | 1.3  | 13.30   | 692 |  |  |
| 693 | TAF2_HUMAN  | Transcription initiation factor TFIID subunit 2 OS=Homo sapiens OX=9606 GN=TAF2 PE=1 SV=3                     | 136.9 | 8.5 | 15.1 | 1 | 1.0  | 36.51   | 693 |  |  |
| 694 | AT5L2_HUMAN | Putative ATP synthase subunit g 2, mitochondrial OS=Homo sapiens OX=9606 GN=ATP5MGL PE=5 SV=1                 | 11.0  | 9.9 | 15.1 | 1 | 10.0 | 63.34   | 694 |  |  |
| 695 | ZHANG_HUMAN | CREB/ATF bZIP transcription factor OS=Homo sapiens OX=9606 GN=CREBZF PE=1 SV=2                                | 37.1  | 5.1 | 15.1 | 1 | 2.8  | 60.42   | 695 |  |  |
| 696 | AGAP2_HUMAN | Arf-GAP with GTPase, ANK repeat and PH domain-containing protein 2 OS=Homo sapiens OX=9606 GN=AGAP2 PE=1 SV=2 | 124.6 | 9.9 | 15.1 | 1 | 1.1  | 52.26   | 696 |  |  |
| 697 | CHIN_HUMAN  | N-chimaerin OS=Homo sapiens OX=9606 GN=CHN1 PE=1 SV=3                                                         | 53.1  | 6.5 | 15.1 | 1 | 3.5  | 498.33  | 697 |  |  |
| 698 | SRARP_HUMAN | Steroid receptor-associated and regulated protein OS=Homo sapiens OX=9606 GN=SRARP PE=1 SV=1                  | 17.6  | 9.2 | 15.1 | 1 | 4.7  | 12.35   | 698 |  |  |
| 699 | ENAM_HUMAN  | Enamelin OS=Homo sapiens OX=9606 GN=ENAM PE=1 SV=3                                                            | 128.7 | 6.4 | 15.1 | 1 | 0.8  | 50.94   | 699 |  |  |
| 700 | RFX5_HUMAN  | DNA-binding protein RFX5 OS=Homo sapiens OX=9606 GN=RFX5 PE=1 SV=1                                            | 65.3  | 9.4 | 15.1 | 1 | 1.5  | 855.10  | 700 |  |  |
| 701 | APOC2_HUMAN | Apolipoprotein C-II OS=Homo sapiens OX=9606 GN=APOC2 PE=1 SV=1                                                | 11.3  | 4.6 | 15.0 | 1 | 10.9 | 51.56   | 701 |  |  |
| 702 | PTHD3_HUMAN | Patched domain-containing protein 3 OS=Homo sapiens OX=9606 GN=PTCHD3 PE=1 SV=3                               | 86.8  | 5.8 | 15.0 | 1 | 1.2  | 38.64   | 702 |  |  |
| 703 | VP13B_HUMAN | Vacuolar protein sorting-associated protein 13B OS=Homo sapiens OX=9606 GN=VPS13B PE=1 SV=2                   | 448.4 | 6.0 | 15.0 | 1 | 0.3  | 990.61  | 703 |  |  |
| 704 | RUXF_HUMAN  | Small nuclear ribonucleoprotein F OS=Homo sapiens OX=9606 GN=SNRPF PE=1 SV=1                                  | 9.7   | 4.6 | 15.0 | 1 | 9.3  | 944.18  | 704 |  |  |
| 705 | CLPT1_HUMAN | Cleft lip and palate transmembrane protein 1 OS=Homo sapiens OX=9606 GN=CLPTM1 PE=1 SV=1                      | 76.0  | 5.9 | 15.0 | 1 | 1.2  | 1184.03 | 705 |  |  |
| 706 | ACO11_HUMAN | Acyl-coenzyme A thioesterase 11 OS=Homo sapiens OX=9606 GN=ACOT11 PE=1 SV=1                                   | 68.4  | 8.7 | 15.0 | 1 | 1.3  | 81.57   | 706 |  |  |

|     |            |                                                                                                          |       |     |      |   |     |        |     |
|-----|------------|----------------------------------------------------------------------------------------------------------|-------|-----|------|---|-----|--------|-----|
| 707 | SYLM_HUMAN | Probable leucine--tRNA ligase, mitochondrial OS=Homo sapiens OX=9606 GN=LARS2 PE=1 SV=2                  | 101.9 | 8.5 | 15.0 | 1 | 1.1 | 853.49 | 707 |
| 708 | RIN2_HUMAN | Ras and Rab interactor 2 OS=Homo sapiens OX=9606 GN=RIN2 PE=1 SV=1                                       | 100.1 | 6.2 | 15.0 | 1 | 1.5 | 14.01  | 708 |
| 709 | NOD2_HUMAN | Nucleotide-binding oligomerization domain-containing protein 2 OS=Homo sapiens OX=9606 GN=NOD2 PE=1 SV=1 | 115.2 | 6.3 | 15.0 | 1 | 1.1 | 50.52  | 709 |

MW=Molecular Weight, PI= Isoelectric Point, SC=Sequence Coverage, LVEF=Left Ventricular Ejection Fraction, CV= coefficients of variation.

**Table S2.** GO classification for the 16 significant differentially expressed proteins in both groups (LVEF $\geq$ 45 vs LVEF<45)

| Biological process                            |       |                                                                                                                                                              |
|-----------------------------------------------|-------|--------------------------------------------------------------------------------------------------------------------------------------------------------------|
| GO-term                                       | #Seqs | Sequence Names                                                                                                                                               |
| localization                                  | 4     | sp Q9ULD2 MTUS1_HUMAN, sp P02787 TRFE_HUMAN, sp Q9BZF3 OSBL6_HUMAN, sp P06727 APOA4_HUMAN                                                                    |
| cellular component organization or biogenesis | 1     | sp O43189 PHF1_HUMAN                                                                                                                                         |
| signaling                                     | 2     | sp Q8TEJ3 SH3R3_HUMAN, sp Q17R89 RHG44_HUMAN                                                                                                                 |
| cellular process                              | 7     | sp Q9ULD2 MTUS1_HUMAN, sp P02787 TRFE_HUMAN, sp O43189 PHF1_HUMAN, sp Q13421 MSLN_HUMAN, sp Q8TEJ3 SH3R3_HUMAN, sp Q9BZF3 OSBL6_HUMAN, sp Q17R89 RHG44_HUMAN |
| developmental process                         | 1     | sp Q13421 MSLN_HUMAN                                                                                                                                         |
| locomotion                                    | 1     | sp Q9ULD2 MTUS1_HUMAN                                                                                                                                        |
| metabolic process                             | 5     | sp O43189 PHF1_HUMAN, sp Q13421 MSLN_HUMAN, sp Q8TEJ3 SH3R3_HUMAN, sp Q9BZF3 OSBL6_HUMAN, sp P06727 APOA4_HUMAN                                              |
| biological regulation                         | 6     | sp Q9ULD2 MTUS1_HUMAN, sp P02787 TRFE_HUMAN, sp O43189 PHF1_HUMAN, sp Q8TEJ3 SH3R3_HUMAN, sp Q9BZF3 OSBL6_HUMAN, sp Q17R89 RHG44_HUMAN                       |
| biological adhesion                           | 1     | sp Q13421 MSLN_HUMAN                                                                                                                                         |
| regulation of biological process              | 5     | sp Q9ULD2 MTUS1_HUMAN, sp O43189 PHF1_HUMAN, sp Q8TEJ3 SH3R3_HUMAN, sp Q9BZF3 OSBL6_HUMAN, sp Q17R89 RHG44_HUMAN                                             |

|                                  |    |                                                                                                                                                                                                                                                                                                       |
|----------------------------------|----|-------------------------------------------------------------------------------------------------------------------------------------------------------------------------------------------------------------------------------------------------------------------------------------------------------|
| response to stimulus             | 4  | sp Q9ULD2 MTUS1_HUMAN, sp O43189 PHF1_HUMAN, sp Q8TEJ3 SH3R3_HUMAN, sp Q17R89 RHG44_HUMAN                                                                                                                                                                                                             |
| immune system process            | 1  | sp Q9ULD2 MTUS1_HUMAN                                                                                                                                                                                                                                                                                 |
| multicellular organismal process | 1  | sp Q13421 MSLN_HUMAN                                                                                                                                                                                                                                                                                  |
| Molecular function               |    |                                                                                                                                                                                                                                                                                                       |
| transporter activity             | 2  | sp P02787 TRFE_HUMAN, sp Q9BZF3 OSBL6_HUMAN                                                                                                                                                                                                                                                           |
| catalytic activity               | 1  | sp Q96QV1 HHIP_HUMAN                                                                                                                                                                                                                                                                                  |
| binding                          | 13 | sp Q9ULD2 MTUS1_HUMAN, sp O43189 PHF1_HUMAN, sp Q13421 MSLN_HUMAN, sp Q9BSW2 EFC4B_HUMAN, sp P10070 GLI2_HUMAN, sp Q17R89 RHG44_HUMAN, sp P02787 TRFE_HUMAN, sp Q12772 SRBP2_HUMAN, sp P29374 ARI4A_HUMAN, sp Q8TEJ3 SH3R3_HUMAN, sp Q9BZF3 OSBL6_HUMAN, sp P06727 APOA4_HUMAN, sp Q5JPB2 ZN831_HUMAN |
| cellular component               |    |                                                                                                                                                                                                                                                                                                       |
| cell part                        | 5  | sp Q9ULD2 MTUS1_HUMAN, sp Q13421 MSLN_HUMAN, sp Q92621 NU205_HUMAN, sp Q9BZF3 OSBL6_HUMAN, sp Q17R89 RHG44_HUMAN                                                                                                                                                                                      |
| organelle part                   | 4  | sp Q9ULD2 MTUS1_HUMAN, sp Q13421 MSLN_HUMAN, sp Q92621 NU205_HUMAN, sp Q9BZF3 OSBL6_HUMAN                                                                                                                                                                                                             |
| membrane                         | 3  | sp Q9ULD2 MTUS1_HUMAN, sp Q13421 MSLN_HUMAN, sp Q9BZF3 OSBL6_HUMAN                                                                                                                                                                                                                                    |
| organelle                        | 4  | sp Q9ULD2 MTUS1_HUMAN, sp Q13421 MSLN_HUMAN, sp Q92621 NU205_HUMAN, sp Q9BZF3 OSBL6_HUMAN                                                                                                                                                                                                             |
| supramolecular complex           | 1  | sp Q9ULD2 MTUS1_HUMAN                                                                                                                                                                                                                                                                                 |
| membrane part                    | 2  | sp Q13421 MSLN_HUMAN, sp Q9BZF3 OSBL6_HUMAN                                                                                                                                                                                                                                                           |
| extracellular region             | 4  | sp P02787 TRFE_HUMAN, sp Q13421 MSLN_HUMAN, sp P06727 APOA4_HUMAN, sp P02768 ALBU_HUMAN                                                                                                                                                                                                               |
| extracellular region part        | 3  | sp P02787 TRFE_HUMAN, sp Q13421 MSLN_HUMAN, sp P02768 ALBU_HUMAN                                                                                                                                                                                                                                      |
| protein-containing complex       | 1  | sp Q92621 NU205_HUMAN                                                                                                                                                                                                                                                                                 |
| cell                             | 5  | sp Q9ULD2 MTUS1_HUMAN, sp Q13421 MSLN_HUMAN, sp Q92621 NU205_HUMAN, sp Q9BZF3 OSBL6_HUMAN, sp Q17R89 RHG44_HUMAN                                                                                                                                                                                      |
| membrane-enclosed lumen          | 2  | sp Q9ULD2 MTUS1_HUMAN, sp Q13421 MSLN_HUMAN                                                                                                                                                                                                                                                           |
